# Supplementary material for: Phylogenomic analysis provides insights into MADS-box and TCP gene diversification and floral development of the Asteraceae, supported by de novo genome and transcriptome sequences from dandelion (Taraxacum officinale)
Source: Front Plant Sci. 2023 Jun 21;14:1198909. doi: 10.3389/fpls.2023.1198909 (PMC10338227; doi:10.3389/fpls.2023.1198909)
Supplement: Supplementary file 2 [file Table_1.xlsx]

## Sheet: Table_S5. Species List
	Supplementary Table S5. Species and sequences used for Synteny analysis
	Code	Prefix	Species	Clade	Order	Family	Sub-family	Common name	Genome version	Source	No. scaffold / chromosome	No. genes	BUSCO % of proteome	link
	1	Ha	Helianthus annuus	Asterid II	Asterales	Asteraceae	Asteroideae	Sunflower	v2	Sunflower Genome Database	371	45008	0.938091	https://sunflowergenome.org/
	2	mm	Mikania micrantha					Bitter vine	v1	NCBI	1539	46329	0.857696	https://www.ncbi.nlm.nih.gov/assembly/GCA_009363875.1
	3	eb	Erigeron breviscapus					Fleabane	v2	CoGe	537	43514	0.791488	https://genomevolution.org/coge/GenomeInfo.pl?gid=56884
	4	cc	Conyza canadensis					Horseweed	v1	CoGe	334	45483	0.919604	https://genomevolution.org/coge/GenomeInfo.pl?gid=56884
	5	lt	Lactuca sativa				Cichorioideae	Lettuce (crop)	v8	CoGe	10	38910	0.94626	https://genomevolution.org/coge/GenomeInfo.pl?gid=37106
	6	ll	Lactuca saligna					Lettuce (wild)	v4	CoGe	10	48186	0.892949	https://genomevolution.org/coge/GenomeInfo.pl?gid=56462
	7	lv	Lactuca virosa					Lettuce (wild)	v4	Coge	3896	39887	0.901118	https://genomevolution.org/coge/GenomeInfo.pl?gid=62664
	8	Tof	Taraxacum officinale					Dandelion	v1	de novo sequenced	4059	60810	0.904557	https://www.ebi.ac.uk/ena/browser/text-search?query=PRJEB58885
	9	Tmo	Taraxacum mongolicum					Dandelion	draft	CNCB-GWH	9	38214	0.688736	https://ngdc.cncb.ac.cn/search/?dbId=gwh&q=GWHBCHG00000000
	10	Tks	Taraxacum kok-saghyz					Dandelion	draft	CNCB-GWH	9	38517	0.735168	https://ngdc.cncb.ac.cn/search/?dbId=gwh&q=GWHBCHF00000000
	11	Cd	Cynara cardunculus				Carduoideae	Cardoon (Artichoke)	CcrdV1	NCBI	17	23394	0.906277	https://www.ncbi.nlm.nih.gov/assembly/GCF_001531365.1,GCF_001531365.1/?&utm_source=gquery
	12	Ct	Carthamus tinctorius					Safflower	v1	The Genome Database of Carthamus tinctorius	12	33343	0.849957	https://safflower.scuec.edu.cn/index.html
	13	Ag	Apium graveolens		Apiales	Apiaceae	Apioideae	Celery	-	Celery genome database (CGD)	671	31326	0.923044	http://celerydb.bio2db.com/
	14	Cs	Coriandrum sativum					Coriander	-	Coriander Genome Database	1529	40747	0.89123	http://cgdb.bio2db.com/Download/
	15	dc	Daucus carota					Carrot	v2.0	Coriander Genome Database	399	32113	0.842218	http://cgdb.bio2db.com/Download/
	16	Lj	Lonicera japonica		Dipsacales	Caprifoliaceae	-	Japanese honeysuckle	-	CNCB-GWH	125	33939	0.801806	https://ngdc.cncb.ac.cn/search/?dbId=gwh&q=GWHAAZE00000000&page=1
	17	sp	Solanum pennellii	Asterid I	Solanales	Solanaceae	Solanoideae	Tomato (wild)	v2.0	Sol Genomics	13	48923	0.969905	https://solgenomics.net/
	18	sl	Solanum lycopersicum					Tomato (crop)	iTAGv2.3	Phytozome	13	34727	0.923904	https://phytozome-next.jgi.doe.gov/
	19	st	Solanum tuberosum					Potato	v3.4	Phytozome	12	35119	0.752365	https://phytozome-next.jgi.doe.gov/
	20	ca	Capsicum annuum					Pepper (red)	Zunla-1_v2.0	CNGBdb/CNSA	13	35336	0.840499	https://ftp.cngb.org/pub/CNSA/data2/CNPhis0000547/pepper/
	21	pa	Petunia axillaris				Petunioideae	Petunia	v1.62	Sol Genomics	1880	32928	0.917885	https://solgenomics.net/
	22	In	Ipomoea nil			Convolvulaceae	-	Japanese Mmorning Glory	Asagao_1.1	NCBI	696	35151	0.981943	https://www.ncbi.nlm.nih.gov/data-hub/genome/GCF_001879475.1/
	23	ug	Utricularia gibba		Lamiales	Lentibulariaceae	-	Humped bladderwort	CoGe_ID:25895	CoGe	1083	28494	0.816423	https://genomevolution.org/coge/GenomeInfo.pl?gid=25895
	24	mg	Mimulus guttatus			Phrymaceae	-	Spotted monkey flower	v2.0	Phytozome	421	28140	0.965176	https://phytozome-next.jgi.doe.gov/
	25	si	Sesamum indicum			Pedaliaceae	-	Sesame	v1.0	ensemblgenomes	512	27148	0.836629	http://ftp.ensemblgenomes.org/pub/plants/release-51/fasta/sesamum_indicum/
	26	co	Coffea canephora		Gentianales	Rubiaceae	Ixoroideae	Robusta coffee	v1	CoGe	12	25574	0.928203	https://genomevolution.org/coge/GenomeInfo.pl?gid=54651
	27	ac	Actinidia chinensis	Asterids	Ericales	Actinidiaceae (Basal Asterid)	-	Kiwifruit	AHRD	CoGe	30	39040	0.650903	https://genomevolution.org/coge/GenomeInfo.pl?gid=20457
	28	Cq	Chenopodium quinoa		Caryophyllales	Amaranthaceae (Basal Asterid)	-	Quinoa	v1.0	Phytozome	957	44776	0.926913	https://phytozome-next.jgi.doe.gov/
	29	Ah	Amaranthus hypochondriacus				-	Grain Amaranth	v2.1	Phytozome	74	23843	0.77515	https://phytozome-next.jgi.doe.gov/
	30	Bv	Beta vulgaris				Betoideae	Common beet	RefBeet-1.2	bvseq.molgen.mpg.de	3414	26921	0.960877	https://bvseq.boku.ac.at/Genome/Download/RefBeet-1.2/
	31	mo	Arabidopsis thaliana	Rosids	Brassicales	Brassicaceae		Cress	Araport11	TAIR	7	27655	0.99785	https://www.arabidopsis.org/download/index.jsp
	32	vv	Vitis vinifera		Vitales	Vitaceae (Basal Rosid)	-	Wine grape	Genoscope.12X	Phytozome	33	26346	0.871883	https://phytozome-next.jgi.doe.gov/
	33	at	Amborella trichopoda	Spermatophyta	Amborellales	Amborellaceae (Basal Angiosperm)	-	Amborella	v1.0	Phytozome	1210	26846	0.852537	https://phytozome-next.jgi.doe.gov/

## Sheet: Table_S6. MADSbox,TCP Reference
	Supplementary Table S6. Reference genes for MADS-box and TCP genes used in this study
	Gene family	Identifier	Species	Type	Sub-group	Other name	Code
	MADS-box	AT1G47760	Arabidopsis thaliana	Type I	Mα		AGL102
	MADS-box	AT3G04100	Arabidopsis thaliana	Type I	Mα		AGL57
	MADS-box	AT1G54760	Arabidopsis thaliana	Type I	Mα		AGL85
	MADS-box	AT1G29962	Arabidopsis thaliana	Type I	Mα		AGL64
	MADS-box	AT1G28450	Arabidopsis thaliana	Type I	Mα		AGL58
	MADS-box	AT1G28460	Arabidopsis thaliana	Type I	Mα		AGL59
	MADS-box	AT1G17310	Arabidopsis thaliana	Type I	Mα		AGL100
	MADS-box	AT1G72350	Arabidopsis thaliana	Type I	Mα		AGL60
	MADS-box	AT2G34440	Arabidopsis thaliana	Type I	Mα		AGL29
	MADS-box	AT3G66656	Arabidopsis thaliana	Type I	Mα		AGL91
	MADS-box	AT1G65360	Arabidopsis thaliana	Type I	Mα		AGL23
	MADS-box	AT1G01530	Arabidopsis thaliana	Type I	Mα		AGL28
	MADS-box	AT4G36590	Arabidopsis thaliana	Type I	Mα		AGL40
	MADS-box	AT5G60440	Arabidopsis thaliana	Type I	Mα		AGL62
	MADS-box	AT2G24840	Arabidopsis thaliana	Type I	Mα		AGL61
	MADS-box	AT5G27130	Arabidopsis thaliana	Type I	Mα		AGL39
	MADS-box	AT1G48150	Arabidopsis thaliana	Type I	Mα		AGL74
	MADS-box	AT5G49490	Arabidopsis thaliana	Type I	Mα		AGL83
	MADS-box	AT5G38620	Arabidopsis thaliana	Type I	Mα		AGL73
	MADS-box	AT5G49420	Arabidopsis thaliana	Type I	Mα		AGL84
	MADS-box	AT1G60880	Arabidopsis thaliana	Type I	Mα		AGL56
	MADS-box	AT1G60920	Arabidopsis thaliana	Type I	Mα		AGL55
	MADS-box	AT1G46408	Arabidopsis thaliana	Type I	Mα		AGL97
	MADS-box	AT5G04640	Arabidopsis thaliana	Type I	Mα		AGL99
	MADS-box	AT5G55690	Arabidopsis thaliana	Type I	Mβ		AGL47
	MADS-box	AT5G58890	Arabidopsis thaliana	Type I	Mβ		AGL82
	MADS-box	AT1G60040	Arabidopsis thaliana	Type I	Mβ		AGL49
	MADS-box	AT1G59810	Arabidopsis thaliana	Type I	Mβ		AGL50
	MADS-box	AT3G18650	Arabidopsis thaliana	Type I	Mβ		AGL103
	MADS-box	AT5G27050	Arabidopsis thaliana	Type I	Mβ		AGL101
	MADS-box	AT5G26880	Arabidopsis thaliana	Type I	Mβ		AGL26
	MADS-box	AT5G27580	Arabidopsis thaliana	Type I	Mβ		AGL89
	MADS-box	AT5G27090	Arabidopsis thaliana	Type I	Mβ		AGL54
	MADS-box	AT5G27070	Arabidopsis thaliana	Type I	Mβ		AGL53
	MADS-box	AT5G26950	Arabidopsis thaliana	Type I	Mβ		AGL93
	MADS-box	AT4G02235	Arabidopsis thaliana	Type I	Mβ		AGL51
	MADS-box	AT4G11250	Arabidopsis thaliana	Type I	Mβ		AGL52
	MADS-box	AT5G65330	Arabidopsis thaliana	Type I	Mβ		AGL78
	MADS-box	AT5G37415	Arabidopsis thaliana	Type I	Mβ		AGL105
	MADS-box	AT5G39750	Arabidopsis thaliana	Type I	Mβ		AGL81
	MADS-box	AT5G39810	Arabidopsis thaliana	Type I	Mβ		AGL98
	MADS-box	AT5G38740	Arabidopsis thaliana	Type I	Mβ		AGL77
	MADS-box	AT5G40120	Arabidopsis thaliana	Type I	Mβ		AGL76
	MADS-box	AT5G40220	Arabidopsis thaliana	Type I	Mβ		AGL43
	MADS-box	AT5G41200	Arabidopsis thaliana	Type I	Mβ		AGL75
	MADS-box	AT1G22590	Arabidopsis thaliana	Type I	Mγ		AGL87
	MADS-box	AT5G06500	Arabidopsis thaliana	Type I	Mγ		AGL96
	MADS-box	AT2G40210	Arabidopsis thaliana	Type I	Mγ		AGL48
	MADS-box	AT2G15660	Arabidopsis thaliana	Type I	Mγ		AGL95
	MADS-box	AT1G31640	Arabidopsis thaliana	Type I	Mγ		AGL92
	MADS-box	AT1G31630	Arabidopsis thaliana	Type I	Mγ		AGL86
	MADS-box	AT1G65300	Arabidopsis thaliana	Type I	Mγ		AGL38
	MADS-box	AT1G65330	Arabidopsis thaliana	Type I	Mγ	PHE1	AGL37
	MADS-box	AT5G26580	Arabidopsis thaliana	Type I	Mγ		AGL34
	MADS-box	AT5G27960	Arabidopsis thaliana	Type I	Mγ		AGL90
	MADS-box	AT5G26650	Arabidopsis thaliana	Type I	Mγ		AGL36
	MADS-box	AT3G05860	Arabidopsis thaliana	Type I	Mγ		AGL45
	MADS-box	AT2G28700	Arabidopsis thaliana	Type I	Mγ		AGL46
	MADS-box	AT5G26630	Arabidopsis thaliana	Type I	Mγ		AGL35
	MADS-box	AT5G27810	Arabidopsis thaliana	Type I	Mγ		AGL106
	MADS-box	AT5G48670	Arabidopsis thaliana	Type I	Mγ		AGL80
	MADS-box	AT1G31140	Arabidopsis thaliana	Type II	BS	GOA/GGM13	AGL63
	MADS-box	AT5G23260	Arabidopsis thaliana	Type II	BS	TT16	AGL32
	MADS-box	AT4G09960	Arabidopsis thaliana	Type II	AG	STK	AGL11
	MADS-box	AT2G42830	Arabidopsis thaliana	Type II	AG	SHP2	AGL5
	MADS-box	AT3G58780	Arabidopsis thaliana	Type II	AG	SHP1	AGL1
	MADS-box	AT4G18960	Arabidopsis thaliana	Type II	AG		AG
	MADS-box	AT5G51860	Arabidopsis thaliana	Type II	SOC1		AGL72
	MADS-box	AT5G51870	Arabidopsis thaliana	Type II	SOC1		AGL71
	MADS-box	AT5G62165	Arabidopsis thaliana	Type II	SOC1		AGL42
	MADS-box	AT4G22950	Arabidopsis thaliana	Type II	SOC1/TM3-like		AGL19
	MADS-box	AT4G11880	Arabidopsis thaliana	Type II	SOC1		AGL14
	MADS-box	AT2G45660	Arabidopsis thaliana	Type II	SOC1	SOC1	AGL20
	MADS-box	AT1G71692	Arabidopsis thaliana	Type II	AGL12		AGL12
	MADS-box	AT3G61120	Arabidopsis thaliana	Type II	AGL6		AGL13
	MADS-box	AT2G45650	Arabidopsis thaliana	Type II	AGL6		AGL6
	MADS-box	AT2G03710	Arabidopsis thaliana	Type II	SEP	SEP4	AGL3
	MADS-box	AT3G02310	Arabidopsis thaliana	Type II	SEP	SEP2	AGL4
	MADS-box	AT5G15800	Arabidopsis thaliana	Type II	SEP	SEP1	AGL2
	MADS-box	AT1G24260	Arabidopsis thaliana	Type II	SEP	SEP3	AGL9
	MADS-box	AT3G30260	Arabidopsis thaliana	Type II	AP1/FUL		AGL79
	MADS-box	AT1G69120	Arabidopsis thaliana	Type II	AP1/FUL	AP1	AGL7
	MADS-box	AT1G26310	Arabidopsis thaliana	Type II	AP1/FUL	CAL	AGL10
	MADS-box	AT5G60910	Arabidopsis thaliana	Type II	AP1/FUL	FUL	AGL8
	MADS-box	AT5G13790	Arabidopsis thaliana	Type II	AGL15		AGL15
	MADS-box	AT5G10140	Arabidopsis thaliana	Type II	FLC	FLC/FLF	AGL25
	MADS-box	AT5G65080	Arabidopsis thaliana	Type II	FLC	MAF5	AGL68
	MADS-box	AT5G65070	Arabidopsis thaliana	Type II	FLC	MAF4	AGL69
	MADS-box	AT1G77080	Arabidopsis thaliana	Type II	FLC	MAF1	AGL27
	MADS-box	AT5G65060	Arabidopsis thaliana	Type II	FLC	MAF3	AGL70
	MADS-box	AT5G65050	Arabidopsis thaliana	Type II	FLC	MAF2	AGL31
	MADS-box	AT3G57390	Arabidopsis thaliana	Type II	AGL18		AGL18
	MADS-box	AT2G14210	Arabidopsis thaliana	Type II	AGL17		AGL44
	MADS-box	AT3G57230	Arabidopsis thaliana	Type II	AGL17		AGL16
	MADS-box	AT2G22630	Arabidopsis thaliana	Type II	AGL17		AGL17
	MADS-box	AT4G37940	Arabidopsis thaliana	Type II	AGL17		AGL21
	MADS-box	AT3G54340	Arabidopsis thaliana	Type II	AP3		AP3
	MADS-box	AT5G20240	Arabidopsis thaliana	Type II	PI		PI
	MADS-box	AT2G22540	Arabidopsis thaliana	Type II	SVP	SVP	AGL22
	MADS-box	AT4G24540	Arabidopsis thaliana	Type II	SVP		AGL24
	MADS-box	AT2G26320	Arabidopsis thaliana	Type II	MIKC*		AGL33
	MADS-box	AT1G18750	Arabidopsis thaliana	Type II	MIKC*		AGL65
	MADS-box	AT1G69540	Arabidopsis thaliana	Type II	MIKC*		AGL94
	MADS-box	AT2G03060	Arabidopsis thaliana	Type II	MIKC*		AGL30
	MADS-box	AT1G77950	Arabidopsis thaliana	Type II	MIKC*		AGL67
	MADS-box	AT1G77980	Arabidopsis thaliana	Type II	MIKC*		AGL66
	MADS-box	AT1G22130	Arabidopsis thaliana	Type II	MIKC*		AGL104
	MADS-box	NP_001234105	Solanum lycopersicum	Type II	TM8	TM8	TM8
	MADS-box	Lsat_1_v5_gn_2_93321	Lactuca sativa	Type II	AS-MADS		LsMADS16
	MADS-box	A0A5J6E2Y7	Petunia hybrida	Type II	AP1/FUL	CAL	EuAP1
	MADS-box	D1MBJ9	Petunia hybrida	Type II	SVP		PMADS20
	MADS-box	Q03489	Petunia hybrida	Type II	SEP	SEP3	FBP2,SEP3
	MADS-box	Q08711	Petunia hybrida	Type II	AG		fbp6
	MADS-box	Q40882	Petunia hybrida	Type II	AG	STK	fbp11
	MADS-box	Q40883	Petunia hybrida	Type II	PI		fbp3
	MADS-box	Q40885	Petunia hybrida	Type II	AG		AG1,pMADS3
	MADS-box	Q43616	Petunia hybrida	Type II	AG	STK	fbp7
	MADS-box	Q6QNL4	Petunia hybrida	Type II	PI		FBP1,GLO1
	MADS-box	Q03488	Petunia hybrida	Type II	PI		FBP1
	MADS-box	Q6UGQ6	Petunia hybrida	Type II	FLC	MAF2	PMADS15
	MADS-box	Q6UGQ7	Petunia hybrida	Type II	AGL17	AGL21	PMADS14
	MADS-box	Q6UGQ8	Petunia hybrida	Type II	SEP	SEP1	PMADS12
	MADS-box	Q6UGQ9	Petunia hybrida	Type II	AGL15		PMADS9
	MADS-box	Q6UGR6	Petunia hybrida	Type II	AP3		DEF
	MADS-box	Q7XBK4	Petunia hybrida	Type II	AP1/FUL		PhFUL
	MADS-box	Q7XBK6	Petunia hybrida	Type II	AP1/FUL		PhFL
	MADS-box	Q9ATE2	Petunia hybrida	Type II	AP1/FUL		FBP29
	MADS-box	Q9ATE3	Petunia hybrida	Type II	SOC1		FBP28
	MADS-box	Q9ATE4	Petunia hybrida	Type II	SVP		FBP25
	MADS-box	Q9ATE5	Petunia hybrida	Type II	BS	TT16	FBP24
	MADS-box	Q9ATE6	Petunia hybrida	Type II	SEP	SEP1	FBP23
	MADS-box	Q9ATE7	Petunia hybrida	Type II	SOC1		FBP22
	MADS-box	Q9ATE8	Petunia hybrida	Type II	SOC1		FBP21
	MADS-box	Q9ATE9	Petunia hybrida	Type II	SOC1		FBP20
	MADS-box	Q9ATF0	Petunia hybrida	Type II	SVP		FBP13
	MADS-box	Q9ATF1	Petunia hybrida	Type II	SEP	SEP1	FBP9
	MADS-box	Q9ATF2	Petunia hybrida	Type II	SEP	SEP1	FBP5
	MADS-box	Q9ATF3	Petunia hybrida	Type II	SEP	SEP1	FBP4
	MADS-box	Q9LLA1	Petunia hybrida	Type II	TM6		TM6
	MADS-box	Q9MB91	Petunia hybrida	Type II	AGL6	AGL13	pMADS4
	MADS-box	Q9SBQ1	Petunia hybrida	Type II	AP1/FUL		PFG
	MADS-box	Q9ZS25	Gerbera hybrida	Type II	AP1/FUL		gsqua1
	MADS-box	D2T2G0	Gerbera hybrida	Type II	AP1/FUL		gsqua2
	MADS-box	D2T2G1	Gerbera hybrida	Type II	AP1/FUL		gsqua3
	MADS-box	D2T2G2	Gerbera hybrida	Type II	AP1/FUL		gsqua5
	MADS-box	D2T2G3	Gerbera hybrida	Type II	AP1/FUL		gsqua6
	MADS-box	Q9ZS28	Gerbera hybrida	Type II	AP3		gdef1
	MADS-box	Q9ZS27	Gerbera hybrida	Type II	AP3		gdef2
	MADS-box	C8YUW0	Gerbera hybrida	Type II	AP3		gdef3
	MADS-box	Q9ZS26	Gerbera hybrida	Type II	PI		gglo1
	MADS-box	Q9ZS30	Gerbera hybrida	Type II	AG		gaga1
	MADS-box	Q9ZS29	Gerbera hybrida	Type II	AG		gaga2
	MADS-box	Q9FST1	Gerbera hybrida	Type II	SEP	SEP3	grcd1
	MADS-box	Q6EUV7	Gerbera hybrida	Type II	SEP	SEP2	grcd2
	MADS-box	Q6EUV6	Gerbera hybrida	Type II	AGL6		grcd3
	MADS-box	D2T2F8	Gerbera hybrida	Type II	SEP	SEP2	grcd4
	MADS-box	D2T2F9	Gerbera hybrida	Type II	SEP	SEP3	grcd5
	MADS-box	A0A222FZL5	Gerbera hybrida	Type II	SEP	SEP2	grcd6
	MADS-box	A0A222FZK8	Gerbera hybrida	Type II	SEP	SEP2	grcd7
	MADS-box	A0A222FZL1	Gerbera hybrida	Type II	SEP	SEP3	grcd8
	MADS-box	F8K8W3	Gerbera hybrida	Type II	SOC1		gsoc1
	MADS-box	F4NAR8	Gerbera hybrida	Type II	SOC1		gsoc2
	TCP	AT1G67260	Arabidopsis thaliana	Class II	CYC/TB1		AtTCP1
	TCP	AT4G18390	Arabidopsis thaliana	Class II	CIN		AtTCP2
	TCP	AT1G53230	Arabidopsis thaliana	Class II	CIN		AtTCP3
	TCP	AT3G15030	Arabidopsis thaliana	Class II	CIN	MEE35	AtTCP4
	TCP	AT5G60970	Arabidopsis thaliana	Class II	CIN		AtTCP5
	TCP	AT5G41030	Arabidopsis thaliana	Class I	PCF		AtTCP6
	TCP	AT5G23280	Arabidopsis thaliana	Class I	PCF		AtTCP7
	TCP	AT1G58100	Arabidopsis thaliana	Class I	PCF		AtTCP8
	TCP	AT2G45680	Arabidopsis thaliana	Class I	PCF		AtTCP9
	TCP	AT2G31070	Arabidopsis thaliana	Class I	PCF		AtTCP10
	TCP	AT2G37000	Arabidopsis thaliana	Class II	CIN		AtTCP11
	TCP	AT1G68800	Arabidopsis thaliana	Class II	CYC/TB1	BRC2	AtTCP12
	TCP	AT3G02150	Arabidopsis thaliana	Class II	CIN	PTF1, TCP10	AtTCP13
	TCP	AT3G47620	Arabidopsis thaliana	Class I	PCF		AtTCP14
	TCP	AT1G69690	Arabidopsis thaliana	Class I	PCF		AtTCP15
	TCP	AT3G45150	Arabidopsis thaliana	Class I	PCF		AtTCP16
	TCP	AT5G08070	Arabidopsis thaliana	Class II	CIN		AtTCP17
	TCP	AT3G18550	Arabidopsis thaliana	Class II	CYC/TB1	BRC1, TBL1	AtTCP18
	TCP	AT5G51910	Arabidopsis thaliana	Class I	PCF		AtTCP19
	TCP	AT3G27010	Arabidopsis thaliana	Class I	PCF		AtTCP20
	TCP	AT5G08330	Arabidopsis thaliana	Class I	PCF	CHE	AtTCP21
	TCP	AT1G72010	Arabidopsis thaliana	Class I	PCF		AtTCP22
	TCP	AT1G35560	Arabidopsis thaliana	Class I	PCF		AtTCP23
	TCP	AT1G30210	Arabidopsis thaliana	Class II	CIN		AtTCP24
	TCP	Os04g11830	Oryza sativa	Class I	PCF	OsTCP15	PCF1
	TCP	Os08g43160	Oryza sativa	Class I	PCF	OsTCP23	PCF2
	TCP	Os11g07460	Oryza sativa	Class I	PCF	OsTCP19, OsTCP26	PCF3
	TCP	Os01g11550	Oryza sativa	Class II	CIN	OsTCP1	PCF5
	TCP	Os03g57190	Oryza sativa	Class II	CIN	OsTCP8, OsTCP14	PCF6
	TCP	Os01g55100	Oryza sativa	Class II	CIN	OsTCP4	PCF7
	TCP	Os12g42190	Oryza sativa	Class II	CIN	OsTCP22, OsTCP29	PCF8
	TCP	Os03g49880	Oryza sativa	Class II	CYC/TB1	OsTCP13	OsTB1
	TCP	Os01g41130	Oryza sativa	Class I	PCF		OsTCP3
	TCP	Os01g55750	Oryza sativa	Class II	CIN	OsTCP2	OsTCP5
	TCP	Os01g69980	Oryza sativa	Class I	PCF	OsTCP3	OsTCP6
	TCP	Os02g42380	Oryza sativa	Class I	PCF	OsTCP4	OsTCP7
	TCP	Os02g51280	Oryza sativa	Class I	PCF	OsTCP5	OsTCP9
	TCP	Os02g51310	Oryza sativa	Class II	CIN	OsTCP6	OsTCP10
	TCP	Os02g58180	Oryza sativa	Class I	PCF		OsTCP11
	TCP	Os03g30880	Oryza sativa	Class I	PCF		OsTCP12
	TCP	Os04g44440	Oryza sativa	Class I	PCF	OsTCP10	OsTCP17
	TCP	Os05g43760	Oryza sativa	Class II	CIN	OsTCP11	OsTCP18
	TCP	Os06g12230	Oryza sativa	Class I	PCF	OsTCP12	OsTCP19
	TCP	Os07g04510	Oryza sativa	Class II	CIN	OsTCP13	OsTCP20
	TCP	Os07g05720	Oryza sativa	Class II	CIN	OsTCP14	OsTCP21
	TCP	Os08g33530	Oryza sativa	Class II	CYC/TB1	OsTCP15	OsTCP22
	TCP	Os09g24480	Oryza sativa	Class II	CYC/TB1	OsTCP17, REP1	OsTCP24
	TCP	Os09g34950	Oryza sativa	Class I	PCF	OsTCP18	OsTCP25
	TCP	Os12g02090	Oryza sativa	Class II	CIN	OsTCP20	OsTCP27
	TCP	Os12g07480	Oryza sativa	Class I	PCF	OsTCP21	OsTCP28
	TCP	Am08g22680	Antirrhinum majus	Class II	CYC/TB1		CYC
	TCP	Am03g11310	Antirrhinum majus	Class II	CIN		CIN
	TCP	Zm00001d033673	Zea mays	Class II	CYC/TB1		tb1

## Sheet: Table_S7. MADSbox,TCP Summary
	Supplementary Table S7. MADS-box and TCP gene identification and classification*
	Taxonomic groups				MADS-box				TCP					Summary statistics of identified MADS-box and TCP genes
	Code	Prefix	Species	Family	Type I	Type II (MIKC*)	Type II (MIKCc)	Total	Class I-PCF	Class II-CIN	Class II-CYC/TB1	Total			MADS-box	TCP
	1	Ha	Helianthus annuus	Asteraceae	25	2	59	86	14	10	17	41		Total	2525	1019
	2	mm	Mikania micrantha		14	1	41	56	11	13	14	38		Average all	76.5152	30.8788
	3	eb	Erigeron breviscapus		6	5	38	49	0	1	4	5		Average Asteraceae	67.1667	32.75
	4	cc	Conyza canadensis		23	4	39	66	10	8	9	27		Average Cichorioideae	69.5	36
	5	lt	Lactuca sativa		25	2	58	85	16	14	10	40		Average Taraxacum	63	32.6667
	6	ll	Lactuca saligna		22	2	48	72	17	10	13	40
	7	lv	Lactuca virosa		19	2	50	71	14	14	10	38
	8	Tof	Taraxacum officinale		20	2	56	78	15	10	8	33	**
	9	Tmo	Taraxacum mongolicum		17	2	35	54	14	8	9	31
	10	Tks	Taraxacum kok-saghyz		11	2	44	57	16	8	10	34
	11	Cd	Cynara cardunculus		20	2	41	63	14	8	11	33
	12	Ct	Carthamus tinctorius		20	8	41	69	9	11	13	33
	13	Ag	Apium graveolens	Apiaceae	12	2	31	45	10	12	10	32
	14	Cs	Coriandrum sativum		44	4	58	106	27	10	8	45
	15	dc	Daucus carota		19	1	6	26	36	7	7	50
	16	Lj	Lonicera japonica	Caprifoliaceae	20	1	5	26	10	6	4	20
	17	sp	Solanum pennellii	Solanaceae	65	17	46	128	14	21	8	43
	18	sl	Solanum lycopersicum		60	9	39	108	12	18	9	39
	19	st	Solanum tuberosum		105	9	30	144	14	11	5	30
	20	ca	Capsicum annuum		64	8	28	100	12	12	7	31
	21	pa	Petunia axillaris		80	12	43	135	10	11	7	28
	22	In	Ipomoea nil	Convolvulaceae	73	1	49	123	14	9	5	28
	23	ug	Utricularia gibba	Lentibulariaceae	24	3	52	79	14	20	10	44
	24	mg	Mimulus guttatus	Phrymaceae	42	7	47	96	12	9	5	26
	25	si	Sesamum indicum	Pedaliaceae	25	4	29	58	14	10	5	29
	26	co	Coffea canephora	Rubiaceae	22	3	31	56	11	5	2	18
	27	ac	Actinidia chinensis	Actinidiaceae (Basal Asterid)	37	7	48	92	22	13	8	43
	28	Cq	Chenopodium quinoa	Amaranthaceae (Basal Asterid)	39	12	53	104	17	10	5	32
	30	Ah	Amaranthus hypochondriacus		20	3	28	51	7	6	3	16
	29	Bv	Beta vulgaris		12	4	28	44	8	5	3	16
	31	mo	Arabidopsis thaliana	Brassicaceae	62	7	41	110	13	8	3	24
	32	vv	Vitis vinifera	Vitaceae (Basal Rosid)	11	7	36	54	6	6	4	16
	33	at	Amborella trichopoda	Amborellaceae (Basal Angiosperm)	12	2	20	34	0	9	7	16
	Average			Asteraceae	18.5	2.8	45.8	67.2	12.5	9.6	10.7	32.8
				Other Dicots	41.8	6.1	36.4	84.3	14.2	10.5	5.9	30.5
				Solanaceae	74.8	11.0	37.2	123.0	12.4	14.6	7.2	34.2
	Ratio			Ratio Solanaceae/Asteraceae	4.0	3.9	0.8	1.8	1.0	1.5	0.7	1.0
	*Scaled data visualized in Figure 2
	**T. officinale has 26 of the 91 MADS-box genes and 10 of the 38 TCP genes that were in separately assembled haplocontigs and interpreted as being alleles. These have been merged to 13 (4 Type I and 9 Type II MIKCc) and 5 (2 PCF, 2 CIN and 1 CYC/TB1) genes, respectively

## Sheet: Table_S8. RNAseq Statistics
	Supplementary Table S8. Read and mapping statistics of transcriptomes of floral tissues at different stages of T. officinale plant FCh72
	Subject	Sample ID	Tissue samples		RNA				Raw reads generated			Reads used for mapping
			Tissues*	Stage**	RNA (ng/uL)	A260/ A280	5 µg RNA / 25 µl (µl)	Send for Sequencing	Number of pairs	Yield (Mbp)	Average quality***	Total number	Mapped in pairs	Mapped as singles	Total mapped (%)
	RNA for annotation	RNA Overall	Buds	2-10					99508341	24877	na	60000000	54169990	5286980	99.1
			flower	12-13
			leaf	-
			root	-
	RNA for expression study of floral tissues and developmental stages	F0S0-1	3 very young, whole buds	2-3	1188.75	2.076	4.20609	25 M	39552737	11794	35.74	60000000	48841802	10370101	98.7
		F0S0-2		2-3	2451.77	2.087	2.03934	25 M	34878243	10371	35.78	60000000	49734234	9468630	98.7
		F0S0-3		2-3	3446.24	2.093	1.45086	25 M	38186365	11347	35.66	60000000	49930644	9229593	98.6
		F1-1	4/5th of 1 closed, mature bud, upper part of ~120 florets	10-11	1165.7	2.116	4.28928	20 M	30347025	9041	35.73	60620890	50229050	9662658	98.8
		F1-2		10-11	1386.43	2.112	3.60639	20 M	31406976	9371	35.75	62740698	51096226	10931778	98.9
		F1-3		10-11	1600.12	2.14	3.12476	20 M	31071008	9269	35.7	62083320	51374424	9959913	98.8
		F2-1	4/5th of 1 open flower head, upper part of ~120 florets	12-13	727.425	2.17	6.87356	20 M	38973279	11609	35.7	60000000	49856244	9472009	98.9
		F2-2		12-13	909.769	2.133	5.4959	20 M	29572958	8802	35.73	59075058	48836900	9587497	98.9
		F2-3		12-13	392.985	2.104	12.7231	20 M	31964151	9536	35.69	63814564	52197202	10537349	98.3
		F3-1	4/5th of 1 head 3 DAP, upper part of ~120 florets	14	235.3	1.84	21.2495	20 M	35447498	10552	35.74	60000000	47046146	9754558	94.7
		F3-2		14	320.9	1.68	15.5812	20 M	35778738	10642	35.73	60000000	45403968	9041413	90.7
		F7-1	4/5th of 1 head 7 DAP, pappus of ~120 florets	15	611.14	1.92	8.18143	20 M	35153894	10478	35.77	60000000	49570214	9731242	98.8
		F7-2		15	114.8	1.93	43.554	20 M	24126473	7128	35.87	48165902	42121824	5436903	98.7
		S1-1	4/5th of 1 closed, mature bud, lower part of ~120 florets / young ovaries	10-11	1205.38	2.055	4.14805	25M	40072204	11901	35.81	60000000	50125972	9134754	98.8
		S1-2		10-11	1186.61	2.055	4.2137	25M	42762946	12692	35.78	60000000	50106470	9132582	98.7
		S1-3		10-11	491.3	2.019	10.1771	25M	38114817	11341	35.72	60000000	49904054	9325419	98.7
		S2-1	4/5th of 1 open flower head, lower part of ~120 florets / maturing ovaries	12-13	2225.95	2.112	2.24623	20 M	28353651	8456	35.8	56622360	46576342	9326108	98.7
		S2-2		12-13	821.495	2.032	6.08646	20 M	31950471	9513	35.8	63803350	52682092	10305063	98.7
		S2-3		12-13	6778.55	2.104	0.737621	20 M	28284815	8419	35.75	56451014	46165204	9515194	98.6
		S3-1	4/5th of 1 head 3 DAP, lower part of ~120 florets / young seeds	14	396.7	1.94	12.604	20 M	31355443	9329	35.7	62591712	51551158	9822438	98.1
		S3-2		14	564	2.04	8.86525	20 M	33990269	10137	35.77	60000000	48984588	9418760	97.3
		S7-1	4/5th of 1 head 7 DAP, lower parts of ~120 florets / maturing seeds	15	1185.97	2.057	4.21595	20 M	33411880	9932	35.67	60000000	49837002	9427591	98.8
		S7-2		15	513.9	1.93	9.72952	20 M	30920666	9229	35.64	61717386	50026718	10878972	98.7
		LF-1	5x leaf part without veins, 0.5x0.5cm	-	559.948	2.072	8.9294	20 M	36971786	11011	35.85	60000000	48885746	10445435	98.9
		LF-2		-	504.478	2.008	9.91123	20 M	32603644	9710	35.84	65115110	53126412	10625717	98.1
	*Upper and lower parts of the florets were separated through the beak							Average	33810077
	**Vijverberg et al. 2021							Min	24126473
	***Read quality excellent; >99.9 reads retained after trimming; average length >149 nt (RNA-overall >124 nt)							Max	42762946

## Sheet: Table_S9a-c. Tissue Expression
	Supplementary Table S9. Overall patterns in T. officinale plant FCh72 floral transcriptomes
	A.				B.									C.
	Summary of tissue/stage specific expression				Summary of overall expression									Highest expressed genes
	Block number and accompanying tissue types*	Total Number of Genes	Percentage of Genes		Heigth	Definition**	Count	%	TER > 10 UGR	TER >> 100 UGR	UGR > 10 TER	UGR >> 100 TER		Gene_ID	Description	SUM TER (TPM)	SUM UGR (TPM)
	1_F0S0	3393	6,5		True Zero	SUM TER + UGR < 0,155	23360	28,7	0	0	0	0		Toff_WURv1_g65381	XP_023770424.1major pollen allergen Art v 1-like	315474	187085
	2_F0S0,S1,S2	9573	18,4		Very Low	TER and UGR < 1	8827	10,9	1	0	0	0		Toff_WURv1_g65382	XP_023770424.1major pollen allergen Art v 1-like	111774	67117
	3_F1	6957	13,4		Low	TER and/or UGR > 1- 10	8789	10,8	325	0	2662	0		Toff_WURv1_g22438	XP_023747539.1anther-specific protein SF18-like	90721	51104
	4_F1,F2	3433	6,6		Medium	TER and/or UGR > 10 - 100	12494	15,4	169	203	1471	843		Toff_WURv1_g54232	GFA92516.1hypothetical protein	83387	57001
	5_F1-3	790	1,5		High	TER and/or UGR > 100 - 1000	21379	26,3	188	171	1651	624		Toff_WURv1_g7766	QQH14902.1elongation factor 1-alpha	71240	59704
	6_F2	1424	2,7		Very High	TER and/or UGR > 1000	6053	7,4	53	70	250	135		Toff_WURv1_g69863	WP_039311726.1MULTISPECIES: histone H3	62627	37529
	7_F2,F3	4048	7,8		Extreme High	TER and/or UGR > 10000	387	0,5	2	6	21	9		Toff_WURv1_g65612	XP_023752395.1copper transport protein ATX1 isoform X2	60480	38813
	8_F2-7	936	1,8		TOTAL		81287	100	738	450	6055	1611		Toff_WURv1_g74399	XP_023736750.1dormancy-associated protein 1-like	55050	35638
	9_F3	569	1,1			Expressed	49102	60,4						Toff_WURv1_g68447	MBD4017447.1acyl-CoA-binding protein	53720	30017
	10_F3,F7	5435	10,5			Unexpressed	32190	39,6						Toff_WURv1_g11199	XP_008350368.2 polyubiquitin	41151	80317
	11_S1,S2	811	1,6											Toff_WURv1_g23137	XP_023737908.1dehydrin ERD14-like	36117	60218
	12_S3,S7	836	1,6											Toff_WURv1_g46129	GEX10205.1RNA-directed DNA polymerase	32653	225049
														Toff_WURv1_g50634	ADD64906.1heat shock protein-like protein	2246	116498
														Toff_WURv1_g50840	XP_023768019.1protein SRC1	4803	111952
														Toff_WURv1_g79259	KAF5773419.1putative bifunctional inhibitor/plant lipid transfer protein/seed storage helical	4594	57293
					**TER = Total Exon Reads per Gene; UGR = Unique Gene Reads; Summary of Supplementary Data_S4b, Columns BU-BX
	*See Heatmap in Supplementary Figure S6 for manually defined expression blocks, and stages and tissues analyzed in Figure 1C

## Sheet: Table_S10. MADS,TCP Expression
	Supplementary Table S10. MADS-box and TCP gene expression in floral tissues at different stages in T. officinale, averaged per replicate (extracted from Supplementary Data S4c)																								MIN, MAX floral tissue only (=LF excluded)														MIN, MAX floral tissue only (=LF excluded)				Expression values on which the heatmaps are based
	Gene_ID	Flower Development Genes						Alleles	Synteny Cluster (Original)	Synteny Cluster (New)	Heatmap Groups		Summary of Expression		Gene Expression,Total Exon Reads (TER) - Transcript Per Kilobase 10 Milion (TP10M)														Gene Expression, Unique Gene Reads (UGR) - Transcript Per Kilobase 10 Milion (TP10M)														Gene Expression,Total Exon Reads (TER) - LOG2[Transcript Per Kilobase 10 Milion +1 (TP10M)]
		Type	P/Kbox* Type	Class	Sub_Class	Selected genes	Label				Number	Tissue Type	Heigth	TER vs UGR	FS0_1-3	F1_1-3	F2_1-3	F3_1-2	F7_1-2	S1_1-3	S2_1-3	S3_1-2	S7_1-2	LF_1-2	MAX	MIN	MAX-MIN	MAX/MIN	FS0_1-3	F1_1-3	F2_1-3	F3_1-2	F7_1-2	S1_1-3	S2_1-3	S3_1-2	S7_1-2	LF_1-2	MAX	MIN	MAX-MIN	MAX/MIN	FS0_1-3	F1_1-3	F2_1-3	F3_1-2	F7_1-2	S1_1-3	S2_1-3
	Toff_WURv1_g37220	MADS	Type I	Mα	AGL29		Mα_AGL29_Tof-g37220		30				Very Low	similar	0	0	0	0	0	0	0	0	1	0	1	1	0	1	0	0	0	0	0	0	0	1	3	0	3	1	2	3	0	0	0	0	0	0	0
	Toff_WURv1_g11476/g37222*	MADS	Type I/II	Mα	AGL29		Mα_AGL29_Tof-g11476/g37222	a	23				High	similar	28	17	15	5	15	32	29	45	235	10	235	5	230	47	59	41	28	12	25	64	72	87	431	21	431	12	419	35.9167	4.85798	4.16993	4	2.58496	4	5.04439	4.90689
	Toff_WURv1_g39059	MADS	Type I	Mα	AGL40		Mα_AGL40_Tof-g39059				11	S1 S2	Medium	similar	2	1	1	1	3	6	12	1	4	0	12	1	11	12	2	2	2	0	3	10	21	3	6	0	21	2	19	10.5	1.58496	1	1	1	2	2.80735	3.70044
	Toff_WURv1_g77247	MADS	Type I	Mα	AGL40		Mα_AGL40_Tof-g77247						Low	UGR>TER	0	0	0	0	0	0	0	0	0	0	-	-	-	-	2	4	4	0	1	2	3	2	15	1	15	1	14	15	0	0	0	0	0	0	0
	Toff_WURv1_g40387/g40775*	MADS	Type I	Mα	AGL61		Mα_AGL61_Tof-g40387/g40775	i			1	F0 S0	Medium	similar	16	7	4	5	5	12	4	2	5	0	16	2	14	8	13	10	4	5	7	14	4	4	3	0	14	3	11	4.66667	4.08746	3	2.32193	2.58496	2.58496	3.70044	2.32193
	Toff_WURv1_g40380/g40384*	MADS	Type I	Mα	AGL62		Mα_AGL62_Tof-g40380/g40384	g	121		11	S1 S2	Medium	similar	7	11	5	11	9	75	71	45	59	10	75	5	70	15	4	6	3	6	5	36	33	23	28	5	36	3	33	12	3	3.58496	2.58496	3.58496	3.32193	6.24793	6.16993
	Toff_WURv1_g40385/g40774*	MADS	Type I	Mα	AGL62		Mα_AGL62_Tof-g40385/g40774	h	20		4	F1 F2	Low	similar	6	2	0	8	2	7	2	0	1	0	8	1	7	8	0	2	0	0	0	0	0	0	0	0	2	2	0	1	2.80735	1.58496	0	3.16993	1.58496	3	1.58496
	Toff_WURv1_g31594	MADS	Type I	Mα	AGL62		Mα_AGL62_Tof-g31594		16		3	F1	Low	similar	3	0	0	0	1	1	0	8	2	0	8	1	7	8	3	0	0	0	1	1	0	8	4	0	8	1	7	8	2	0	0	0	1	1	0
	Toff_WURv1_g31595	MADS	Type I	Mα	AGL62		Mα_AGL62_Tof-g31595				1	F0 S0	High	similar	114	34	23	23	15	68	35	37	32	9	114	15	99	7.6	138	42	28	25	15	73	46	34	38	11	138	15	123	9.2	6.84549	5.12928	4.58496	4.58496	4	6.10852	5.16993
	Toff_WURv1_g35034	MADS	Type I	Mα	AGL62		Mα_AGL62_Tof-g35034		144		3	F1	High	similar	148	99	54	46	96	82	46	40	59	67	148	40	108	3.7	117	88	43	38	70	65	36	29	47	59	117	29	88	4.03448	7.21917	6.64386	5.78136	5.55459	6.59991	6.37504	5.55459
	Toff_WURv1_g37537	MADS	Type I	Mα	AGL62		Mα_AGL62_Tof-g37537		46		1	F0 S0	Low	similar	5	1	2	2	0	4	3	5	1	0	5	1	4	5	6	1	2	2	0	3	4	4	2	0	6	1	5	6	2.58496	1	1.58496	1.58496	0	2.32193	2
	Toff_WURv1_g37538	MADS	Type I	Mα	AGL62		Mα_AGL62_Tof-g37538						Very Low	similar	0	0	0	0	0	0	0	0	1	0	1	1	0	1	0	0	0	0	0	0	0	0	4	0	4	4	0	1	0	0	0	0	0	0	0
	Toff_WURv1_g17380	MADS	Type I	Mβ	AGL47		Mβ_AGL47_Tof-g17380		41		1	F0 S0	Medium	similar	89	0	0	0	0	0	0	0	0	0	89	89	0	1	117	0	0	0	0	0	0	0	0	0	117	117	0	1	6.49185	0	0	0	0	0	0
	Toff_WURv1_g37903	MADS	Type I	Mβ	AGL47		Mβ_AGL47_Tof-g37903		18		1	F0 S0	Medium	similar	46	1	1	1	0	0	1	0	0	0	46	1	45	46	33	0	0	1	0	0	1	1	1	0	33	1	32	33	5.55459	1	1	1	0	0	1
	Toff_WURv1_g21518	MADS	Type I	Mγ	AGL38		Mγ_AGL38_Tof-g21518		26				Low	similar	1	1	0	0	0	1	0	0	2	0	2	1	1	2	0	1	0	0	0	0	0	0	4	0	4	1	3	4	1	1	0	0	0	1	0
	Toff_WURv1_g57693	MADS	Type I	Mγ	AGL45		Mγ_AGL45_Tof-g57693		35				Low	similar	0	0	2	0	0	0	0	2	13	0	13	2	11	6.5	0	1	2	0	0	0	0	3	22	0	22	1	21	22	0	0	1.58496	0	0	0	0
	Toff_WURv1_g32612	MADS	Type I	Mγ	AGL80		Mγ_AGL80_Tof-g32612		40		1	F0 S0	Medium	similar	8	2	2	2	0	3	1	7	20	0	20	1	19	20	10	2	1	1	0	2	3	9	28	1	28	1	27	28	3.16993	1.58496	1.58496	1.58496	0	2	1
	Toff_WURv1_g32613	MADS	Type I	Mγ	AGL80		Mγ_AGL80_Tof-g32613				2	F0 S0 S1 S2	Low	similar	0	0	0	0	0	2	0	0	0	0	2	2	0	1	0	0	0	0	0	3	2	3	1	0	3	1	2	3	0	0	0	0	0	1.58496	0
	Toff_WURv1_g82829	MADS	Type I	Mγ	AGL90		Mγ_AGL90_Tof-g82829				3	F1	High	similar	60	42	31	22	68	96	121	61	97	43	121	22	99	5.5	59	41	30	35	83	101	123	76	81	51	123	30	93	4.1	5.93074	5.42626	5	4.52356	6.10852	6.59991	6.93074
	Toff_WURv1_g14799	MADS	Type II	AP1/FUL	AGL7		A1_AP1_Tof-g14799_Ls55		1		10	F3 F7	Very High	similar	549	234	349	1338	4693	1626	2140	3173	2729	1	4693	234	4459	20.0556	484	290	296	959	3850	1346	1704	2632	2148	1	3850	290	3560	13.2759	9.10329	7.87652	8.45121	10.3869	12.1966	10.668	11.0641
	Toff_WURv1_g10436	MADS	Type II	AP1/FUL	AGL7		A2_AP1/FUL_Tof-g10436		1				High	similar	155	12	19	97	206	387	284	276	283	0	387	12	375	32.25	207	17	26	111	251	471	359	339	366	0	471	17	454	27.7059	7.2854	3.70044	4.32193	6.61471	7.69349	8.59991	8.15482
	Toff_WURv1_g40602/g40612*	MADS	Type II	AP1/FUL	AGL8		A2_AP1/FUL_Tof-g40602/g40612	j	1		2	F0 S0 S1 S2	High	similar	273	54	97	63	204	430	240	185	225	10	430	54	376	7.96296	152	33	55	39	133	246	133	100	119	8	246	33	213	7.45455	8.09803	5.78136	6.61471	6	7.67948	8.75154	7.91289
	Toff_WURv1_g48081	MADS	Type II/I	AP1/FUL	AGL8		A2_AP1/FUL_Tof-g48081		1				High	UGR>TER	4	2	3	1	21	37	22	10	6	0	37	1	36	37	76	34	23	36	192	355	226	125	86	0	355	23	332	15.4348	2.32193	1.58496	2	1	4.45943	5.24793	4.52356
	Toff_WURv1_g12885	MADS	Type II	AP1/FUL	AGL8		A3_AP1/FUL_Tof-g12885		1		4	F1 F2	High	similar	191	254	539	58	49	224	237	64	128	206	539	49	490	11	164	211	449	43	42	199	192	53	95	180	449	42	407	10.6905	7.58496	7.99435	9.07682	5.88264	5.64386	7.81378	7.89482
	Toff_WURv1_g25593	MADS	Type II	AP1/FUL	AGL8		A3_AP1/FUL_Tof-g25593		1		1	F0 S0	High	similar	136	22	9	2	13	146	82	18	65	42	146	2	144	73	213	63	18	4	15	258	125	30	86	62	258	4	254	64.5	7.09803	4.52356	3.32193	1.58496	3.80735	7.19967	6.37504
	Toff_WURv1_g12873	MADS	Type II	AS-MADS	LsMADS16	To_ASMADS_1	A4_ASMADS_Tof-g12873_Ls16		1		1	F0 S0	High	similar	377	9	7	1	3	152	26	12	28	0	377	1	376	377	309	9	15	7	4	96	20	6	17	4	309	4	305	77.25	8.56224	3.32193	3	1	2	7.25739	4.75489
	Toff_WURv1_g75347	MADS	Type II/I	AS-MADS	LsMADS16	***	A4_ASMADS_Tof-g75347_Ls16		2	6	1	F0 S0	Medium	UGR>TER	0	0	1	0	0	0	0	0	1	0	1	1	0	1	3	1	5	0	0	0	5	0	2	50	5	1	4	5	0	0	1	0	0	0	0
	Toff_WURv1_g8985/g40264*	MADS	Type II	PI	PI		B1_PI_Tof-g08985/g40264_Ls03	m	10		3	F1	High	similar	1386	928	439	49	1	7	1	0	1	0	1386	1	1385	1386	836	495	272	29	0	4	1	0	0	0	836	1	835	836	10.4378	9.85953	8.78136	5.64386	1	3	1
	Toff_WURv1_g9004	MADS	Type II	PI	PI		B1_PI_Tof-g09004		10		4	F1 F2	Very High	similar	7340	12275	11376	1007	0	392	5	0	2	2	12275	2	12273	6137.5	5111	8278	7682	726	0	260	3	0	1	1	8278	1	8277	8278	12.8418	13.5836	13.4738	9.97728	0	8.61839	2.58496
	Toff_WURv1_g23268	MADS	Type II	AP3	AP3		B2_AP3_Tof-g23268__Ls30		5		6	F2	Very High	similar	240	1252	1411	747	1854	166	128	450	421	3	1854	128	1726	14.4844	230	1400	1539	781	1908	173	132	436	400	3	1908	132	1776	14.4545	7.91289	10.2912	10.4635	9.54689	10.8572	7.3837	7.01123
	Toff_WURv1_g25644	MADS	Type II	AP3	AP3		B3_AP3_Tof-g25644		5		3	F1	Very High	similar	876	1687	1240	253	758	123	38	70	92	0	1687	38	1649	44.3947	934	1936	1338	250	937	131	40	82	106	0	1936	40	1896	48.4	9.77643	10.7211	10.2773	7.98868	9.56796	6.9542	5.2854
	Toff_WURv1_g12790	MADS	Type II	AP3	AP3/TM6		B3_TM6_Tof-g12790_Ls51		5		3	F1	Very High	similar	2070	1441	1742	219	45	530	410	267	290	3	2070	45	2025	46	1944	1306	1510	167	40	531	402	249	262	3	1944	40	1904	48.6	11.0161	10.4939	10.7674	7.78136	5.52356	9.05257	8.68299
	Toff_WURv1_g16439	MADS	Type II	AG	AG	To_AG_CL1	C1_AG_Tof-g16439_Ls69		9	1	3	F1	Very High	similar	693	704	386	236	412	799	586	300	346	1	799	236	563	3.38559	538	653	358	208	447	764	590	303	359	2	764	208	556	3.67308	9.43879	9.46148	8.59619	7.88874	8.69	9.64386	9.19722
	Toff_WURv1_g11491	MADS	Type II	AG	AG	To_AG_CL1	C2_AG_Tof-g11491_Ls44		9	1	3	F1	Very High	similar	1430	1244	1422	302	701	2203	1181	483	718	0	2203	302	1901	7.2947	1197	1113	1236	242	620	1861	1024	399	630	0	1861	242	1619	7.69008	10.4828	10.2819	10.4747	8.24317	9.45533	11.1059	10.207
	Toff_WURv1_g1625	MADS	Type II	AG	AGL11/STK	To_STK_CL4	D1_AGL11_Tof-g01625		29	4	11	S1 S2	Very High	similar	103	200	332	31	13	3056	2556	1225	1473	1	3056	13	3043	235.077	75	145	219	21	10	2118	1700	768	955	0	2118	10	2108	211.8	6.70044	7.65105	8.37938	5	3.80735	11.5779	11.3202
	Toff_WURv1_g47577/g72631*	MADS	Type II	AG	AGL11	To_STK_UN	D2_AGL11_g47577/g72631	l	5		6		High	UGR>TER	53	72	72	26	134	128	87	58	57	0	134	26	108	5.15385	167	482	408	244	641	514	450	267	315	3	641	167	474	3.83832	5.75489	6.18982	6.18982	4.75489	7.07682	7.01123	6.45943
	Toff_WURv1_g17003/g64139*	MADS	Type II	AG	AGL11	To_STK_CL5	D3_AGL11_g17003/g64139	e	143	5	11	S1 S2	Very High	similar	58	24	57	35	53	1891	1856	996	1254	1	1891	24	1867	78.7917	35	16	37	17	27	1104	1029	520	680	0	1104	16	1088	69	5.88264	4.64386	5.85798	5.16993	5.75489	10.8857	10.8588
	Toff_WURv1_g23621	MADS	Type II	SEP	AGL9	To_SEP3_CL7	E1_SEP3_Tof-g23621		28	7	3	F1	Very High	similar	1366	1169	329	154	491	936	483	172	214	4	1366	154	1212	8.87013	974	804	211	115	329	674	333	105	137	3	974	105	869	9.27619	10.4168	10.1923	8.36632	7.27612	8.94251	9.87191	8.91886
	Toff_WURv1_g15439/g39646*	MADS	Type II	SEP	AGL4		E2_SEP2_g15439/g39646	c	1		10	F3 F7	Very High	similar	564	253	386	791	1678	1495	2265	1107	987	0	2265	253	2012	8.95257	464	213	327	655	1484	1229	1848	885	781	0	1848	213	1635	8.67606	9.14211	7.98868	8.59619	9.62936	10.7134	10.5469	11.1459
	Toff_WURv1_g40941/g42125*	MADS	Type II	SEP	AGL4		E2_SEP2_Tof-g40941/g42125	k			6	F2	Very High	similar	1018	836	2126	826	1943	1568	1390	1635	1648	61	2126	826	1300	2.57385	441	374	877	287	722	637	592	681	718	21	877	287	590	3.05575	9.99294	9.70908	11.0546	9.69174	10.9248	10.6156	10.4419
	Toff_WURv1_g2224	MADS	Type II	SEP	AGL4		E3_SEP2_Tof-g02224_Ls14		1		3	F1	Very High	similar	1429	1248	1992	401	116	1225	973	1248	1068	0	1992	116	1876	17.1724	1582	1407	2012	429	131	1308	1074	1230	1152	1	2012	131	1881	15.3588	10.4818	10.2866	10.9607	8.65105	6.87036	10.2597	9.92778
	Toff_WURv1_g7936	MADS	Type II/I	SEP	AGL3		E4_SEP4_Tof-g07936		57		7	F2 F3	Low	similar	0	1	2	1	0	0	3	4	1	1	4	1	3	4	0	1	2	1	0	1	2	3	1	1	3	1	2	3	0	1	1.58496	1	0	0	2
	Toff_WURv1_g56832	MADS	Type II/I	SEP	AGL3		E4_SEP4_Tof-g56832		34				High	similar	7	6	5	6	21	28	22	29	13	117	29	5	24	5.8	33	29	34	34	112	138	133	82	82	649	138	29	109	4.75862	3	2.80735	2.58496	2.80735	4.45943	4.85798	4.52356
	Toff_WURv1_g12509	MADS	Type II	FLC	AGL70	To_FLC_5	E4_FLC_Tof-g12509				3	F1	Low	similar	1	9	0	0	0	0	3	0	3	0	9	1	8	9	0	10	1	0	0	1	2	1	3	0	10	1	9	10	1	3.32193	0	0	0	0	2
	Toff_WURv1_g16963	MADS	Type II	AGL6	AGL6		E5_AGL6_Tof-g16963		4		10	F3 F7	Very High	similar	2331	691	1113	1097	3413	9921	7553	3758	4337	3	9921	691	9230	14.3575	1415	446	677	626	2115	5991	4601	2129	2522	2	5991	446	5545	13.4327	11.1874	9.43463	10.1215	10.1007	11.7372	13.2764	12.883
	Toff_WURv1_g34565	MADS	Type II	SEP	AGL9	To_SEP3_CL6	E5_SEP3_Tof-g34565		2	6	3	F1	Very High	similar	1089	685	513	78	212	1388	1470	582	596	2	1470	78	1392	18.8462	1132	731	483	79	205	1666	1532	510	538	1	1666	79	1587	21.0886	10.0901	9.42206	9.00562	6.30378	7.73471	10.4398	10.5226
	Toff_WURv1_g15985/g72653*	MADS	Type II	AGL12	AGL12		M_AGL12_g15985/g72653	d			2	F0 S0 S1 S2	Medium	similar	8	12	5	1	1	85	83	3	2	0	85	1	84	85	8	7	3	0	0	64	53	2	2	0	64	2	62	32	3.16993	3.70044	2.58496	1	1	6.42626	6.39232
	Toff_WURv1_g31755/g31756*	MADS	Type II	AGL15	AGL15		M_AGL15_g31755/g31756	f	12		2	F0 S0 S1 S2	High	similar	491	439	190	52	145	538	668	801	1345	0	1345	52	1293	25.8654	326	300	127	32	86	339	428	477	828	0	828	32	796	25.875	8.94251	8.78136	7.57743	5.72792	7.18982	9.07414	9.38586
	Toff_WURv1_g19016	MADS	Type II	AGL15	AGL15		M_AGL15_Tof-g19016						Medium	similar	71	21	14	12	16	40	31	23	93	0	93	12	81	7.75	54	14	9	8	14	27	22	18	64	0	64	8	56	8	6.16993	4.45943	3.90689	3.70044	4.08746	5.35755	5
	Toff_WURv1_g32934	MADS	Type II	AGL17	AGL16		M_AGL17_Tof-g32934		6		3	F1	High	UGR>TER	1	5	1	0	1	3	2	2	1	3	5	1	4	5	94	40	66	35	67	96	120	74	78	20	120	35	85	3.42857	1	2.58496	1	0	1	2	1.58496
	Toff_WURv1_g41628	MADS	Type II	AGL17	AGL16		M_AGL17_Tof-g41628						Low	similar	0	0	1	3	1	2	1	0	0	0	3	1	2	3	0	0	1	3	2	2	1	1	1	0	3	1	2	3	0	0	1	2	1	1.58496	1
	Toff_WURv1_g14087/g30672*	MADS	Type II	AGL17	AGL21		M_AGL17_g14087/g30672	b	13		4	F1 F2	High	similar	72	100	75	68	24	46	36	59	42	15	100	24	76	4.16667	170	135	93	68	36	119	108	101	69	50	170	36	134	4.72222	6.18982	6.65821	6.24793	6.10852	4.64386	5.55459	5.20945
	Toff_WURv1_g25135	MADS	Type II	AGL17	AGL21		M_AGL17_Tof-g25135		6		3	F1	Low	similar	0	1	1	2	1	1	1	2	0	0	2	1	1	2	0	2	2	1	0	1	1	1	2	0	2	1	1	2	0	1	1	1.58496	1	1	1
	Toff_WURv1_g26695	MADS	Type II	AGL17	AGL21		M_AGL17_Tof-g26695		6		7	F2 F3	Medium	similar	3	5	11	26	71	7	17	7	18	0	71	3	68	23.6667	1	3	9	18	48	5	12	5	14	0	48	1	47	48	2	2.58496	3.58496	4.75489	6.16993	3	4.16993
	Toff_WURv1_g36065	MADS	Type II	BS	AGL32		M_AGL32_Tof-g36065		10		11	S1 S2	High	similar	0	2	0	1	6	607	242	206	195	0	607	1	606	607	1	1	0	1	5	467	194	147	141	0	467	1	466	467	0	1.58496	0	1	2.80735	9.24793	7.92481
	Toff_WURv1_g12391	MADS	Type II	AS-MADS	LsMADS16	To_FLC_1	M_ASMADS_Tof-g12391_Ls16		110		10	F3 F7	High	similar	12	38	13	93	26	35	15	79	23	68	93	12	81	7.75	74	67	41	123	53	128	73	109	56	87	128	41	87	3.12195	3.70044	5.2854	3.80735	6.55459	4.75489	5.16993	4
	Toff_WURv1_g12392	MADS	Type II	AS-MADS	LsMADS16	To_FLC_2	M_ASMADS_Tof-g12392_Ls16				10	F3 F7	High	similar	11	76	36	209	68	25	11	145	35	125	209	11	198	19	82	130	105	244	90	127	93	184	77	149	244	77	167	3.16883	3.58496	6.26679	5.20945	7.71425	6.10852	4.70044	3.58496
	Toff_WURv1_g12393	MADS	Type II	AS-MADS	LsMADS16	To_FLC_3	M_ASMADS_Tof-g12393_Ls16						High	similar	34	11	16	8	2	7	5	2	0	432	34	2	32	17	76	67	63	56	65	64	70	54	46	466	76	46	30	1.65217	5.12928	3.58496	4.08746	3.16993	1.58496	3	2.58496
	Toff_WURv1_g12508	MADS	Type II/I	AS-MADS	LsMADS16	***	M_ASMADS_Tof-g12508_Ls16		34				Low	UGR>TER	0	0	0	0	0	0	0	0	0	0	-	-	-	-	0	1	2	0	0	1	0	2	1	9	2	1	1	2	0	0	0	0	0	0	0
	Toff_WURv1_g15806	MADS	Type II	AS-MADS	LsMADS16	To_FLC_7	M_ASMADS_Tof-g15806_Ls16		56		6	F2	Medium	similar	5	2	4	1	8	8	8	0	3	7	8	1	7	8	36	19	32	17	34	38	29	9	26	33	38	9	29	4.22222	2.58496	1.58496	2.32193	1	3.16993	3.16993	3.16993
	Toff_WURv1_g75350	MADS	Type II/I	AS-MADS	LsMADS16	***	M_ASMADS_Tof-g75350_Ls16				1	F0 S0	High	UGR>TER	33	7	4	0	1	7	3	6	8	5	33	1	32	33	215	95	125	15	12	73	128	18	57	137	215	12	203	17.9167	5.08746	3	2.32193	0	1	3	2
	Toff_WURv1_g56982	MADS	Type II/I	FLC	AGL25	***	M_FLC_Tof-g56982		2	6			true zero	similar	0	0	0	0	0	0	0	0	0	0	-	-	-	-	0	0	0	0	0	0	0	0	0	0	-	-	-	-	0	0	0	0	0	0	0
	Toff_WURv1_g12394	MADS	Type II	FLC	AGL31	To_FLC_4	M_FLC_Tof-g12394				8	F2 F3 F7	High	similar	138	110	149	47	150	100	115	98	75	79	150	47	103	3.19149	200	177	244	77	246	171	179	154	126	229	246	77	169	3.19481	7.11894	6.79442	7.22882	5.58496	7.2384	6.65821	6.85798
	Toff_WURv1_g15710	MADS	Type II	FLC	AGL70	To_FLC_6	M_FLC_Tof-g15710				3	F1	High	similar	77	108	62	65	90	170	175	52	66	81	175	52	123	3.36538	184	134	72	59	98	221	183	58	64	87	221	58	163	3.81034	6.2854	6.76818	5.97728	6.04439	6.50779	7.41785	7.45943
	Toff_WURv1_g25399	MADS	Type II	FLC	AGL70	To_FLC_8	M_FLC_Tof-g25399				9	F3	Medium	similar	46	3	4	8	1	2	5	12	8	31	46	1	45	46	167	7	9	35	16	15	18	25	18	44	167	7	160	23.8571	5.55459	2	2.32193	3.16993	1	1.58496	2.58496
	Toff_WURv1_g40335	MADS	Type II	FLC	AGL70	To_FLC_9	M_FLC_Tof-g40335		109				High	similar	244	126	163	180	378	322	381	314	326	131	381	126	255	3.02381	274	110	180	132	336	285	343	248	263	143	343	110	233	3.11818	7.93664	6.98868	7.35755	7.49985	8.56605	8.33539	8.57743
	Toff_WURv1_g6951	MADS	Type II	SOC1	AGL20		M_SOC1_Tof-g06951		4		3	F1	High	similar	53	157	43	1	40	10	3	2	6	174	157	1	156	157	44	133	34	1	35	7	4	1	6	160	133	1	132	133	5.75489	7.30378	5.45943	1	5.35755	3.45943	2
	Toff_WURv1_g11816	MADS	Type II	SOC1	AGL20		M_SOC1_Tof-g11816		4		4	F1 F2	Medium	similar	4	132	49	15	9	4	5	21	10	4	132	4	128	33	6	152	59	21	13	4	5	24	9	5	152	4	148	38	2.32193	7.05528	5.64386	4	3.32193	2.32193	2.58496
	Toff_WURv1_g72928	MADS	Type II/I	SOC1	AGL20		M_SOC1_Tof-g72928		7		10	F3 F7	High	similar	2	4	7	8	45	8	10	7	5	5	45	2	43	22.5	38	19	71	90	209	100	93	76	68	17	209	19	190	11	1.58496	2.32193	3	3.16993	5.52356	3.16993	3.45943
	Toff_WURv1_g34755	MADS	Type II	SOC1	AGL42		M_SOC1_Tof-g34755		7		2	F0 S0 S1 S2	Medium	similar	27	8	16	3	6	40	21	13	13	46	40	3	37	13.3333	45	19	25	7	9	60	37	20	22	85	60	7	53	8.57143	4.80735	3.16993	4.08746	2	2.80735	5.35755	4.45943
	Toff_WURv1_g21751	MADS	Type II	SVP	AGL22		M_SVP_Tof-g21751		3		3	F1	High	similar	40	1433	40	0	1	32	42	44	73	35	1433	1	1432	1433	28	1044	26	0	1	21	28	25	48	26	1044	1	1043	1044	5.35755	10.4858	5.35755	0	1	5.04439	5.42626
	Toff_WURv1_g21753	MADS	Type II	SVP	AGL22		M_SVP_Tof-g21753				2	F0 S0 S1 S2	High	similar	39	60	1	0	1	105	89	71	111	51	111	1	110	111	87	153	1	0	1	201	144	146	234	132	234	1	233	234	5.32193	5.93074	1	0	1	6.72792	6.49185
	Toff_WURv1_g26592	MADS	Type II	SVP	AGL22		M_SVP_Tof-g26592		3		3	F1	High	similar	18	117	97	27	22	329	182	39	43	0	329	18	311	18.2778	18	73	56	14	13	217	112	25	33	1	217	13	204	16.6923	4.24793	6.88264	6.61471	4.80735	4.52356	8.36632	7.5157
	Toff_WURv1_g29211	MADS	Type II	SVP	AGL22		M_SVP_Tof-g29211		3				Very High	similar	11	23	21	3	43	3	4	4	19	6478	43	3	40	14.3333	7	13	12	2	28	2	2	3	11	4008	28	2	26	14	3.58496	4.58496	4.45943	2	5.45943	2	2.32193
	Toff_WURv1_g16252	MADS	Type II	TM8	TM8		M_TM8_Tof-g16252		19		11	S1 S2	High	similar	16	0	1	7	9	305	26	32	88	1	305	1	304	305	9	0	1	4	5	171	14	17	48	0	171	1	170	171	4.08746	0	1	3	3.32193	8.25739	4.75489
	Toff_WURv1_g3989	MADS	Type II	MIKC*	AGL104		M*_Tof-g03989		32		4	F1 F2	High	similar	6	283	73	0	0	0	0	0	0	0	283	6	277	47.1667	4	208	53	0	0	0	0	0	0	0	208	4	204	52	2.80735	8.14975	6.20945	0	0	0	0
	Toff_WURv1_g43144	MADS	Type II/I	MIKC*	AGL65		M*_Tof-g43144		11		4	F1 F2	High	similar	60	300	520	64	83	30	39	49	42	12	520	30	490	17.3333	35	185	296	38	47	18	23	27	25	9	296	18	278	16.4444	5.93074	8.23362	9.02514	6.02237	6.39232	4.9542	5.32193
	Toff_WURv1_g36098	MADS	Type II	MIKC*	AGL67		M*_Tof-g36098		33		12	S3 S7	Medium	similar	1	0	0	0	0	8	0	43	166	0	166	1	165	166	1	0	0	0	0	5	0	26	110	0	110	1	109	110	1	0	0	0	0	3.16993	0
	Toff_WURv1_g29996/g78847**	REF		PP2A			REF_PP2A_Tof-g29996/g78847								400	370	398	604	404	478	496	443	356	316	604	356	248	1.69663	468	445	462	655	456	534	590	490	399	389	659	399	260	1.65163	8.64746	8.53528	8.64024	9.24079	8.66178	8.90388	8.9571
	Toff_WURv1_g17984/g20880**	REF		UBC9			REF_UBC_Tof-g17984/g20880								1006	1224	1605	1782	1626	1124	1313	1524	1679	811	1782	1006	776	1.77137	578	724	904	985	958	648	730	818	936	501	985	578	407	1.70415	9.97585	10.2586	10.6493	10.8001	10.668	10.1357	10.3597
	Toff_WURv1_g10321	TCP	Class I	PCF	TCP7-Like	To_PCF_CL12	PCF_TCP07L_Tof-g10321		11	12	2	F0 S0 S1 S2	Very High	similar	829	152	270	405	395	1020	840	321	273	451	1020	152	868	6.71053	846	165	262	438	390	951	776	321	284	473	951	165	786	5.76364	9.69697	7.25739	8.08215	8.66534	8.62936	9.99577	9.71596
	Toff_WURv1_g34652	TCP	Class I	PCF	TCP7-Like	To_PCF_CL15	PCF_TCP07L_Tof-g34652		15	15	2	F0 S0 S1 S2	High	similar	228	52	154	66	176	279	186	44	88	223	279	44	235	6.34091	367	95	202	119	254	397	273	65	130	327	397	65	332	6.10769	7.8392	5.72792	7.27612	6.06609	7.46761	8.12928	7.54689
	Toff_WURv1_g37899	TCP	Class I	PCF	TCP8-Like	To_PCF_CL11	PCF_TCP08L_Tof-g37899		12	11	2	F0 S0 S1 S2	Very High	similar	597	270	160	84	181	824	1043	179	122	397	1043	84	959	12.4167	442	197	119	66	139	632	803	135	98	316	803	66	737	12.1667	9.224	8.08215	7.33092	6.40939	7.50779	9.68825	10.0279
	Toff_WURv1_g6945	TCP	Class I	PCF	TCP8-Like	To_PCF_CL9	PCF_TCP08L_Tof-g06945		4	9	4	F1 F2	High	similar	44	60	61	10	24	38	18	11	10	7	61	10	51	6.1	63	93	90	15	31	66	30	10	14	15	93	10	83	9.3	5.49185	5.93074	5.9542	3.45943	4.64386	5.2854	4.24793
	Toff_WURv1_g12978	TCP	Class I	PCF	TCP14-Like	To_PCF_CL8	PCF_TCP14L_Tof-g12978		3	8	10	F3 F7	High	similar	103	14	37	73	68	99	75	57	52	82	103	14	89	7.35714	109	18	43	77	89	111	91	64	56	93	111	18	93	6.16667	6.70044	3.90689	5.24793	6.20945	6.10852	6.64386	6.24793
	Toff_WURv1_g28293	TCP	Class I	PCF	TCP14-Like		PCF_TCP14L_Tof-g28293						true zero	similar	0	0	0	0	0	0	0	0	0	0	-	-	-	-	0	0	0	0	0	0	0	0	0	0	-	-	-	-	0	0	0	0	0	0	0
	Toff_WURv1_g37792	TCP	Class I	PCF	TCP14-Like	To_PCF_CL8	PCF_TCP14L_Tof-g37792		3	8	3	F1	Medium	similar	67	32	43	34	8	57	21	10	6	79	67	6	61	11.1667	62	32	38	29	7	52	19	8	7	78	62	7	55	8.85714	6.08746	5.04439	5.45943	5.12928	3.16993	5.85798	4.45943
	Toff_WURv1_g41820	TCP	Class I	PCF	TCP14-Like		PCF_TCP14L_Tof-g41820				10	F3 F7	High	similar	28	22	39	100	80	149	105	63	29	74	149	22	127	6.77273	27	23	39	91	79	142	99	56	25	72	142	23	119	6.17391	4.85798	4.52356	5.32193	6.65821	6.33985	7.22882	6.72792
	Toff_WURv1_g35213/g45767*	TCP	Class I	PCF	TCP15-Like	To_PCF_CL8	PCF_TCP15L_Tof-g35213/g45767	r	3	8			Medium	similar	12	5	4	14	7	47	27	9	3	1	47	3	44	15.6667	8	3	2	9	4	23	16	5	2	1	23	2	21	11.5	3.70044	2.58496	2.32193	3.90689	3	5.58496	4.80735
	Toff_WURv1_g34756/g41357*	TCP	Class I	PCF	TCP18-Like	To_PCF_CL9	PCF_TCP18L_Tof-g34756/g41357	q	4	9	6	F2	High	similar	125	98	199	114	85	64	92	75	37	25	199	37	162	5.37838	125	92	157	89	67	58	82	64	32	19	157	32	125	4.90625	6.97728	6.62936	7.64386	6.84549	6.42626	6.02237	6.53916
	Toff_WURv1_g32216	TCP	Class I	PCF	TCP19-Like	To_PCF_CL9	PCF_TCP19L_Tof-g32216		4	9	6	F2	High	similar	68	124	69	34	13	20	25	14	17	2	124	13	111	9.53846	98	215	110	43	17	36	33	29	23	3	215	17	198	12.6471	6.10852	6.96578	6.12928	5.12928	3.80735	4.39232	4.70044
	Toff_WURv1_g37087	TCP	Class I	PCF	TCP19-Like	To_PCF_CL9	PCF_TCP19L_Tof-g37087		4	9	1	F0 S0	High	similar	901	99	115	142	111	41	36	68	62	38	901	36	865	25.0278	644	107	98	153	132	49	31	76	75	47	644	31	613	20.7742	9.81698	6.64386	6.85798	7.15987	6.80735	5.39232	5.20945
	Toff_WURv1_g22919	TCP	Class I	PCF	TCP20-Like	To_PCF_CL10	PCF_TCP20L_Tof-g22919		6	10	10	F3 F7	High	similar	77	14	106	193	161	106	57	162	44	90	193	14	179	13.7857	51	12	74	143	114	75	40	104	31	69	143	12	131	11.9167	6.2854	3.90689	6.74147	7.59991	7.33985	6.74147	5.85798
	Toff_WURv1_g34873	TCP	Class I	PCF	TCP20-Like	To_PCF_CL10	PCF_TCP20L_Tof-g34873		6	10	10	F3 F7	High	similar	96	2	55	64	67	28	20	53	67	108	96	2	94	48	87	3	46	58	56	21	21	47	60	98	87	3	84	29	6.59991	1.58496	5.80735	6.02237	6.08746	4.85798	4.39232
	Toff_WURv1_g8470	TCP	Class I	PCF		To_PCF_CL13	PCF_TCPLike_Tof-g08470		10	13	2	F0 S0 S1 S2	Low	similar	1	0	0	0	0	5	5	2	2	1	5	1	4	5	2	0	0	2	0	5	5	2	4	1	5	2	3	2.5	1	0	0	0	0	2.58496	2.58496
	Toff_WURv1_g12085/g26404*	TCP	Class II	CIN	TCP2-Like		CIN_TCP02L_Tof-g12085/g26404	o	9		1	F0 S0	High	similar	2018	254	252	470	755	600	464	281	334	1444	2018	252	1766	8.00794	2076	277	243	439	823	678	529	290	352	1355	2076	243	1833	8.54321	10.9794	7.99435	7.98299	8.87958	9.56224	9.23122	8.86109
	Toff_WURv1_g23422	TCP	Class II	CIN	TCP4-Like		CIN_TCP04L_Tof-g23422		1				Very High	similar	599	262	336	97	182	168	155	51	96	1055	599	51	548	11.7451	1217	553	717	164	333	359	378	109	196	2201	1217	109	1108	11.1651	9.22882	8.03892	8.3966	6.61471	7.5157	7.40088	7.2854
	Toff_WURv1_g33083	TCP	Class II	CIN	TCP4-Like		CIN_TCP04L_Tof-g33083		1		10	F3 F7	High	similar	566	158	128	312	407	113	64	51	82	437	566	51	515	11.098	405	120	95	206	283	81	48	38	62	333	405	38	367	10.6579	9.1472	7.31288	7.01123	8.29002	8.67243	6.83289	6.02237
	Toff_WURv1_g12894	TCP	Class II	CIN	TCP5-Like		CIN_TCP05L_Tof-g12894		2		10	F3 F7	High	similar	5	10	26	224	718	15	19	41	37	85	718	5	713	143.6	4	7	16	156	477	11	13	27	24	62	477	4	473	119.25	2.58496	3.45943	4.75489	7.81378	9.48985	4	4.32193
	Toff_WURv1_g42808	TCP	Class II	CIN	TCP6-Like		CIN_TCP06L_Tof-g42808		1		1	F0 S0	Medium	similar	183	2	0	1	0	11	6	2	10	15	183	1	182	183	200	2	1	0	0	14	9	2	17	26	200	1	199	200	7.52356	1.58496	0	1	0	3.58496	2.80735
	Toff_WURv1_g19601	TCP	Class II	CIN	TCP10-Like		CIN_TCP10L_Tof-g19601		16		2	F0 S0 S1 S2	Medium	similar	10	5	2	1	0	4	30	4	4	0	30	1	29	30	14	6	3	1	0	8	41	6	7	0	41	1	40	41	3.45943	2.58496	1.58496	1	0	2.32193	4.9542
	Toff_WURv1_g10404/g32550*	TCP	Class II	CIN	TCP13-Like		CIN_TCP13L_Tof-g10404/g32550	n	2				High	similar	202	131	259	219	475	30	23	38	41	90	475	23	452	20.6522	189	122	206	157	337	22	18	34	35	82	337	18	319	18.7222	7.66534	7.04439	8.02237	7.78136	8.89482	4.9542	4.58496
	Toff_WURv1_g37194	TCP	Class II	CIN	TCP17-Like		CIN_TCP17L_Tof-g37194		2		6	F2	High	similar	80	42	68	39	32	28	18	7	10	186	80	7	73	11.4286	62	34	54	33	23	20	13	7	9	152	62	7	55	8.85714	6.33985	5.42626	6.10852	5.32193	5.04439	4.85798	4.24793
	Toff_WURv1_g25570	TCP	Class II	CIN			CIN_TCPLike_Tof-g25570		2		6	F2	Low	similar	6	0	1	0	0	0	0	0	0	20	6	1	5	6	4	0	1	0	0	0	0	0	0	16	4	1	3	4	2.80735	0	1	0	0	0	0
	Toff_WURv1_g44836	TCP	Class II	CIN			CIN_TCPLike_Tof-g44836		2		6	F2	Medium	similar	14	0	4	0	0	0	0	0	1	41	14	1	13	14	8	0	2	0	0	0	0	0	1	25	8	1	7	8	3.90689	0	2.32193	0	0	0	0
	Toff_WURv1_g12302	TCP	Class II	CYC/TB1	TCP12-Like		CYC_TCP12L_Tof-g12302		7		2	F0 S0 S1 S2	Low	similar	7	4	2	0	0	9	6	1	2	1	9	1	8	9	8	3	2	0	0	6	5	1	1	1	8	1	7	8	3	2.32193	1.58496	0	0	3.32193	2.80735
	Toff_WURv1_g2202	TCP	Class II	CYC/TB1	TCP18-Like		CYC_TCP18L_Tof-g02202		5				Medium	similar	29	0	0	14	3	0	2	18	3	0	29	2	27	14.5	20	0	0	11	3	0	1	14	2	0	20	1	19	20	4.90689	0	0	3.90689	2	0	1.58496
	Toff_WURv1_g2203/g28306*	TCP	Class II	CYC/TB1	TCP18-Like		CYC_TCP18L_Tof-g02203/g28306	p			2	F0 S0 S1 S2	Low	similar	6	0	0	1	0	4	0	2	2	6	6	1	5	6	2	0	0	0	0	2	0	1	0	4	2	0	2	#DIV/0!	2.80735	0	0	1	0	2.32193	0
	Toff_WURv1_g12841	TCP	Class II	CYC/TB1	TCP18-Like		CYC_TCP18L_Tof-g12841		5				Medium	similar	12	1	1	4	18	2	1	3	6	1	18	1	17	18	14	0	2	4	19	2	1	3	7	2	19	1	18	19	3.70044	1	1	2.32193	4.24793	1.58496	1
	Toff_WURv1_g28305	TCP	Class II	CYC/TB1	TCP18-Like		CYC_TCP18L_Tof-g28305		5				Low	similar	8	1	0	1	0	0	3	11	0	2	11	1	10	11	6	1	0	1	1	0	2	7	0	2	7	1	6	7	3.16993	1	0	1	0	0	2
	Toff_WURv1_g24074	TCP	Class II	CYC/TB1			CYC_TCPLike_Tof-g24074						Low	UGR>TER	0	0	0	0	0	0	0	0	0	0	-	-	-	-	3	2	1	0	3	2	2	6	4	0	6	1	5	6	0	0	0	0	0	0	0
	Toff_WURv1_g37866	TCP	Class II/I	PCF/CYC/TB1			CYC_TCPLike_Tof-g37866						true zero	similar	0	0	0	0	0	0	0	0	0	0	0	0	0	-	0	0	0	0	0	0	0	0	0	0	-	-	-	-	0	0	0	0	0	0	0
	Toff_WURv1_g36520	TCP	Class II	CYC/TB1			CYC_Tof-TCPLike_g36520				3	F1	High	similar	26	20	10	3	6	26	19	8	12	13	26	3	23	8.66667	113	114	57	19	38	127	114	44	49	41	127	19	108	6.68421	4.75489	4.39232	3.45943	2	2.80735	4.75489	4.32193
	Toff_WURv1_g3253	TF		AP2			AP2_Tof-g03253				6	F2	Medium	similar	2	2	1	0	0	1	1	0	1	1	2	1	1	2	6	44	12	1	3	4	6	2	7	2	44	1	43	44	1.58496	1.58496	1	0	0	1	1
	Toff_WURv1_g17984	TF		AP2			AP2_Tof-g17984				10	F3 F7	High	similar	336	172	431	371	525	396	510	590	455	225	590	172	418	3.43023	350	177	450	336	499	390	529	564	439	233	564	177	387	3.18644	8.3966	7.43463	8.75489	8.53916	9.03892	8.633	8.99718
	Toff_WURv1_g20880	TF		AP2			AP2_Tof-g20880				4	F1 F2	High	similar	45	130	94	3	23	49	48	12	29	45	130	3	127	43.3333	29	96	67	4	15	34	30	8	18	33	96	4	92	24	5.52356	7.03342	6.56986	2	4.58496	5.64386	5.61471
	Toff_WURv1_g21085	TF		AP2			AP2_Tof-g21085				1	F0 S0	Medium	similar	52	1	4	2	1	2	0	4	5	15	52	1	51	52	35	1	4	2	1	2	0	3	3	12	35	1	34	35	5.72792	1	2.32193	1.58496	1	1.58496	0
	Toff_WURv1_g27799	TF		AP2			AP2_Tof-g27799				1	F0 S0	Medium	similar	123	5	7	6	0	5	2	17	8	13	123	2	121	61.5	78	4	5	4	1	5	1	13	8	11	78	1	77	78	6.9542	2.58496	3	2.80735	0	2.58496	1.58496
	Toff_WURv1_g36682	TF		AP2			AP2_Tof-g36682				2	F0 S0 S1 S2	Medium	similar	32	18	9	8	17	25	45	21	29	45	45	8	37	5.625	25	15	7	5	12	21	36	16	22	39	36	5	31	7.2	5.04439	4.24793	3.32193	3.16993	4.16993	4.70044	5.52356
	Toff_WURv1_g37523	TF		AP2			AP2_Tof-g37523				8	F2 F3 F7	High	similar	105	70	247	83	172	31	57	117	157	66	247	31	216	7.96774	63	48	165	58	116	21	36	73	103	47	165	21	144	7.85714	6.72792	6.14975	7.9542	6.39232	7.43463	5	5.85798
	*Alleles (see Column I) are merged into one gene (indicated with a double number in Column B) with expression values summed																																										0	0	0	0	0	0	0
	Toff_WURv1_g11476	MADS	Type I/II	Mα	AGL29		Mα_AGL29_Tof-g11476	a_1	23				High	similar	18	11	12	4	10	26	25	17	77	9	77	4	73	19.25	40	28	22	12	15	52	53	31	142	18	142	12	130	11.8333	4.24793	3.58496	3.70044	2.32193	3.45943	4.75489	4.70044
	Toff_WURv1_g37222	MADS	Type I/II	Mα	AGL29		Mα_AGL29_Tof-g37222	a_2					Medium	similar	10	6	3	1	5	6	4	28	158	1	158	1	157	158	19	13	6	0	10	12	19	56	289	3	289	6	283	48.1667	3.45943	2.80735	2	1	2.58496	2.80735	2.32193
	Toff_WURv1_g14087	MADS	Type II	AGL17	AGL21		M_AGL17_Tof-g14087	b_1	13		4	F1 F2	High	similar	51	73	52	34	15	34	26	32	30	11	73	15	58	4.86667	109	92	62	32	21	73	69	57	45	36	109	21	88	5.19048	5.70044	6.20945	5.72792	5.12928	4	5.12928	4.75489
	Toff_WURv1_g30672	MADS	Type II	AGL17	AGL21		M_AGL17_Tof-g30672	b_2			4	F1 F2	Medium	similar	21	27	23	34	9	12	10	27	12	4	34	9	25	3.77778	61	43	31	36	15	46	39	44	24	14	61	15	46	4.06667	4.45943	4.80735	4.58496	5.12928	3.32193	3.70044	3.45943
	Toff_WURv1_g39646	MADS	Type II	SEP	AGL4		E2_SEP2_Tof-g39646	c_1			10	F3 F7	Very High	similar	386	151	247	578	1129	1002	1621	799	669	0	1621	151	1470	10.7351	288	118	189	432	917	756	1229	584	475	0	1229	118	1111	10.4153	8.59619	7.24793	7.9542	9.17742	10.1421	9.97011	10.6636
	Toff_WURv1_g15439	MADS	Type II	SEP	AGL4		E2_SEP2_Tof-g15439	c_2	1		10	F3 F7	High	similar	178	102	139	213	549	493	644	308	318	0	644	102	542	6.31373	176	95	138	223	567	473	619	301	306	0	619	95	524	6.51579	7.48382	6.6865	7.12928	7.74147	9.10329	8.94837	9.33316
	Toff_WURv1_g15985	MADS	Type II	AGL12	AGL12		M_AGL12_Tof-g15985	d_1			2	F0 S0 S1 S2	Medium	similar	8	12	5	1	1	85	83	3	2	0	85	1	84	85	8	7	3	0	0	64	52	2	2	0	64	2	62	32	3.16993	3.70044	2.58496	1	1	6.42626	6.39232
	Toff_WURv1_g72653	MADS	Type II/I	AGL12	AGL12		M_AGL12_Tof-g72653	d_2					true zero	similar	0	0	0	0	0	0	0	0	0	0	0	0	0	-	0	0	0	0	0	0	1	0	0	0	1	1	0	1	0	0	0	0	0	0	0
	Toff_WURv1_g17003	MADS	Type II	AG	AGL11/STK		D3_AGL11_Tof-g17003	e_1	143	5	11	S1 S2	Very High	similar	54	23	54	32	51	1857	1837	980	1236	1	1857	23	1834	80.7391	32	14	35	17	27	1045	992	502	656	0	1045	14	1031	74.6429	5.78136	4.58496	5.78136	5.04439	5.70044	10.8595	10.8439
	Toff_WURv1_g64139	MADS	Type II/I	AG	AGL11/STK		D3_AGL11_Tof-g64139	e_2			11	S1 S2	Medium	similar	4	1	3	3	2	34	19	16	18	0	34	1	33	34	3	2	2	0	0	59	37	18	24	0	59	2	57	29.5	2.32193	1	2	2	1.58496	5.12928	4.32193
	Toff_WURv1_g31756	MADS	Type II	AGL15	AGL15		M_AGL15_Tof-g31756	f_1			2	F0 S0 S1 S2	High	similar	265	224	95	26	77	297	346	440	739	0	739	26	713	28.4231	168	146	63	17	48	183	219	260	439	0	439	17	422	25.8235	8.05528	7.81378	6.58496	4.75489	6.2854	8.21917	8.43879
	Toff_WURv1_g31755	MADS	Type II	AGL15	AGL15		M_AGL15_Tof-g31755	f_2	12		2	F0 S0 S1 S2	High	similar	226	215	95	26	68	241	322	361	606	0	606	26	580	23.3077	158	154	64	15	38	156	209	217	389	0	389	15	374	25.9333	7.82655	7.75489	6.58496	4.75489	6.10852	7.91886	8.33539
	Toff_WURv1_g40380	MADS	Type I	Mα	AGL62		Mα_AGL62_Tof-g40380	g_1	121		11	S1 S2	Medium	similar	7	11	5	11	9	75	71	45	59	10	75	5	70	15	4	6	3	6	5	36	33	23	28	5	36	3	33	12	3	3.58496	2.58496	3.58496	3.32193	6.24793	6.16993
	Toff_WURv1_g40384	MADS	Type I	Mα	AGL62		Mα_AGL62_Tof-g40384	g_2					true zero	similar	0	0	0	0	0	0	0	0	0	0	-	-	-	-	0	0	0	0	0	0	0	0	0	0	-	-	-	-	0	0	0	0	0	0	0
	Toff_WURv1_g40774	MADS	Type I	Mα	AGL62		Mα_AGL62_Tof-g40774	h_1			4	F1 F2	Low	similar	2	1	0	4	1	3	0	0	0	0	4	1	3	4	0	2	0	0	0	0	0	0	0	0	2	2	0	1	1.58496	1	0	2.32193	1	2	0
	Toff_WURv1_g40385	MADS	Type I	Mα	AGL62		Mα_AGL62_Tof-g40385	h_2	20				Low	TER>UGR	4	1	0	4	1	4	2	0	1	0	4	1	3	4	0	0	0	0	0	0	0	0	0	0	-	-	-	-	2.32193	1	0	2.32193	1	2.32193	1.58496
	Toff_WURv1_g40387	MADS	Type I	Mα	AGL61		Mα_AGL61_Tof-g40387	i_1			1	F0 S0	Medium	similar	10	5	3	3	3	7	2	1	4	0	10	1	9	10	8	5	2	2	3	8	2	2	2	0	8	2	6	4	3.45943	2.58496	2	2	2	3	1.58496
	Toff_WURv1_g40775	MADS	Type I	Mα	AGL61		Mα_AGL61_Tof-g40775	i_2			1	F0 S0	Low	similar	6	2	1	2	2	5	2	1	1	0	6	1	5	6	5	5	2	3	4	6	2	2	1	0	6	1	5	6	2.80735	1.58496	1	1.58496	1.58496	2.58496	1.58496
	Toff_WURv1_g40602	MADS	Type II	AP1/FUL	AGL8		A2_AP1/FUL_Tof-g40602	j_1	1		2	F0 S0 S1 S2	High	similar	152	29	56	32	122	210	121	88	106	8	210	29	181	7.24138	84	18	30	21	75	120	64	50	55	6	120	18	102	6.66667	7.25739	4.90689	5.83289	5.04439	6.94251	7.7211	6.93074
	Toff_WURv1_g40612	MADS	Type II	AP1/FUL	AGL7		A2_AP1/FUL_Tof-g40612	j_2			2	F0 S0 S1 S2	High	similar	121	25	41	31	82	220	119	97	119	2	220	25	195	8.8	68	15	25	18	58	126	69	50	64	2	126	15	111	8.4	6.93074	4.70044	5.39232	5	6.37504	7.7879	6.90689
	Toff_WURv1_g42125	MADS	Type II	SEP	AGL4		E3_SEP2_Tof-g42125	k_1			6	F2	Very High	similar	1018	836	2126	826	1943	1568	1390	1635	1648	61	2126	826	1300	2.57385	439	372	871	285	721	631	587	677	716	21	871	285	586	3.05614	9.99294	9.70908	11.0546	9.69174	10.9248	10.6156	10.4419
	Toff_WURv1_g40941	MADS	Type II	SEP	AGL4		E3_SEP2_Tof-g40941	k_2					Low	UGR>TER	0	0	0	0	0	0	0	0	0	0	-	-	-	-	2	2	6	2	1	6	5	4	2	0	6	1	5	6	0	0	0	0	0	0	0
	Toff_WURv1_g47577	MADS	Type II/I	AG	AGL11/STK		D2_AGL11_Tof-g47577	l_1	5		6	F2	High	UGR>TER	8	34	29	15	77	29	27	25	28	0	77	8	69	9.625	92	406	310	213	569	351	318	226	270	3	569	92	477	6.18478	3.16993	5.12928	4.90689	4	6.2854	4.90689	4.80735
	Toff_WURv1_g72631	MADS	Type II	AG	AGL11/STK		D2_AGL11_Tof-g72631	l_2			3	F1	High	similar	45	38	43	11	57	99	60	33	29	0	99	11	88	9	75	76	98	31	72	163	132	41	45	0	163	31	132	5.25806	5.52356	5.2854	5.45943	3.58496	5.85798	6.64386	5.93074
	Toff_WURv1_g40264	MADS	Type II	PI	PI		B1_PI_Tof-g40264_Ls03	m_1	10		3	F1	High	similar	792	585	336	44	1	4	1	0	1	0	792	1	791	792	524	332	212	23	0	3	1	0	0	0	524	1	523	524	9.63118	9.19476	8.3966	5.49185	1	2.32193	1
	Toff_WURv1_g8985	MADS	Type II	PI	PI		B1_PI_Tof-g08985_LS03	m_2	10		3	F1	High	similar	594	343	103	5	0	3	0	0	0	0	594	3	591	198	312	163	60	6	0	1	0	0	0	0	312	1	311	312	9.21675	8.42626	6.70044	2.58496	0	2	0
	Toff_WURv1_g10404	TCP	Class II	CIN	TCP13-Like		CIN_TCP13L_Tof-g10404	n_1	2				High	similar	132	78	148	108	186	27	22	20	24	60	186	20	166	9.3	109	70	108	69	118	16	15	16	18	50	118	15	103	7.86667	7.05528	6.30378	7.21917	6.76818	7.54689	4.80735	4.52356
	Toff_WURv1_g32550	TCP	Class II	CIN	TCP13-Like		CIN_TCP13L_Tof-g32550	n_2	2				High	similar	70	53	111	111	289	3	1	18	17	30	289	1	288	289	80	52	98	88	219	6	3	18	17	32	219	3	216	73	6.14975	5.75489	6.80735	6.80735	8.17991	2	1
	Toff_WURv1_g26404	TCP	Class II	CIN	TCP2-Like		CIN_TCP02L_Tof-g26404	o_1	9		1	F0 S0	High	similar	1054	140	115	143	302	383	297	125	142	399	1054	115	939	9.16522	1153	157	119	146	315	454	347	137	152	432	1153	119	1034	9.68908	10.043	7.13955	6.85798	7.16993	8.24317	8.58496	8.21917
	Toff_WURv1_g12085	TCP	Class II	CIN	TCP2-Like		CIN_TCP02L_Tof-g12085	o_2	9		2	F0 S0 S1 S2	High	similar	964	114	137	327	453	217	167	156	192	1045	964	114	850	8.45614	923	120	124	293	508	224	182	153	200	923	923	120	803	7.69167	9.91439	6.84549	7.10852	8.35755	8.82655	7.76818	7.39232
	Toff_WURv1_g28306	TCP	Class II	CYC/TB1	TCP18-Like		CYC_TCP18L_Tof-g28306	p_1			2	F0 S0 S1 S2	Low	similar	6	0	0	0	0	3	0	2	0	4	6	2	4	3	2	0	0	0	0	2	0	1	0	2	2	1	1	2	2.80735	0	0	0	0	2	0
	Toff_WURv1_g2203	TCP	Class II	CYC/TB1	TCP18-Like		CYC_TCP18L_Tof-g02203	p_2					Low	similar	0	0	0	1	0	1	0	0	2	2	2	1	1	2	0	0	0	0	0	0	0	0	0	2	-	-	-	-	0	0	0	1	0	1	0
	Toff_WURv1_g41357	TCP	Class I	PCF	TCP18-Like		PCF_TCP18L_Tof-g41357	q_1			6	F2	High	similar	67	55	120	69	47	32	50	50	23	18	120	23	97	5.21739	67	54	96	54	39	31	48	41	20	12	96	20	76	4.8	6.08746	5.80735	6.91886	6.12928	5.58496	5.04439	5.67243
	Toff_WURv1_g34756	TCP	Class I	PCF	TCP18-Like		PCF_TCP18L_Tof-g34756	q_2	4	9	6	F2	High	similar	58	43	79	45	38	32	42	25	14	7	79	14	65	5.64286	58	38	61	35	28	27	34	23	12	7	61	12	49	5.08333	5.88264	5.45943	6.32193	5.52356	5.2854	5.04439	5.42626
	Toff_WURv1_g35213	TCP	Class I	PCF	TCP15-Like		PCF_TCP15L_Tof-g35213	r_1	3	8			Medium	similar	7	2	2	8	4	30	20	6	2	0	30	2	28	15	4	2	1	5	2	15	11	3	1	0	15	1	14	15	3	1.58496	1.58496	3.16993	2.32193	4.9542	4.39232
	Toff_WURv1_g45767	TCP	Class I	PCF	TCP15-Like		PCF_TCP15L_Tof-g45767	r_2			5	F1 F2 F3	Medium	similar	5	3	2	6	3	17	7	3	1	1	17	1	16	17	4	1	1	4	2	8	5	2	1	1	8	1	7	8	2.58496	2	1.58496	2.80735	2	4.16993	3
	**Reference genes are taken together per type with expression values averaged																																										0	0	0	0	0	0	0
	Toff_WURv1_g12576	REF		PP2A			REF_PP2A_Tof-g12576				7	F2 F3	Very High	similar	392	300	394	611	420	502	571	478	320	328	611	300	311	2.03667	539	437	535	791	528	644	775	603	428	463	791	428	363	1.84813	8.61839	8.23362	8.62571	9.25739	8.71768	8.97441	9.15987
	Toff_WURv1_g38505	REF		PP2A			REF_PP2A_Tof-g38505				7	F2 F3	Very High	similar	408	439	402	596	387	453	421	407	391	304	596	387	209	1.54005	396	452	389	519	383	424	404	376	369	314	519	369	150	1.4065	8.67596	8.78136	8.65464	9.22159	8.59991	8.82655	8.7211
	Toff_WURv1_g29996	REF		UBC			REF_UBC_Tof-g29996				7	F2 F3	Very High	similar	1296	1582	2052	2091	1801	1373	1645	1999	2203	976	2203	1296	907	1.69985	726	912	1123	1118	1048	770	897	1038	1191	590	1191	726	465	1.6405	10.341	10.6284	11.0035	11.0307	10.8154	10.4242	10.6847
	Toff_WURv1_g78847	REF		UBC9			REF_UBC9_Tof-g78847				7	F2 F3	Very High	similar	716	866	1158	1473	1451	874	981	1048	1155	645	1473	716	757	2.05726	430	535	685	851	867	525	563	598	680	412	867	430	437	2.01628	9.48583	9.75989	10.1787	10.5255	10.5038	9.77314	9.93958
	*T. officinale has 26 of the 91 MADS-box genes and 10 of the 38 TCP genes that were in separately assembled haplocontigs and interpreted as being alleles. These have been merged to 13 and 5 genes, respectively, and their expression Summed in this Expression Table
	**Two times two Reference genes were included in the analysis and their expression was Averaged in this Expression Table
	***These FLC-like genes were excluded from the phylogeny (Figure 1B) and expression visualization (Figure 5C) due to a lacking k-box domain.
[truncated: 13 more columns]

## Sheet: Table_S12 MADS,TCP_Gene Info
	Supplementary Table S12. MADS-box and TCP gene info
	Gene_ID	(Super)_ Scaffold	Region	Description	Flower_Development_Genes						Chromosome region start	Chromosome region end	Transcript_Variants			Gene_ Length	Number_of_Exons	Transcript_Length	Gene ID		Gene Sequence	Alleles	Synteny Cluster (Original)	Synteny Cluster (New)	Heatmap Groups
					Type	P/Kbox* Type	Class	Sub_Class	Selection	Label			Number	ID	ID_Org				Seq_Idem	Prot>99%					Number	Tissue Type
	Toff_WURv1_g37220	SS_2000008310	complement(55065..55631)	XP_024965069.1agamous-like MADS-box protein AGL29	MADS	Type I	Mα	AGL29		Mα_AGL29_Tof-g37220	55064	55631	1	t1	t1	567	1	567			ATGGCAAGATTACCAGGTGGAGGTGGTCGCAAAAGGACACAACTAAAAAGAATCGAAATTGAAAGGGAACGAGCGATTTCCTTCACAAAGCGACATGTTGGCTTATTAAAAAAAGCCAATGAGCTAGCCACATTATGTGGCATAGAGATTTCAATCAATCTCTTCTCCTTAAGTGGAAAGCCTCTTGCTTTTGGAACCCCTAATGTTCCTTATATCATAAACAAATTTCTCAACTCGAATCAAGTCAACAAACATCCAGATGATTTCGTCACAAGGTTTGATAAGTCTTCCAATGAATCCAAGGTTTATGAGCTCTGCCAAGAACTTGATGAAGTGAATGAGCAATTAGCAAATGAGAAGAAAAAGGGACAAATGTTACAAGAGCGGTTAAAGGCGTCA…		30
	Toff_WURv1_g11476/g37222*	SS_186/SS_2000008310	complement(4436750..4437349)/complement(92993..93592)	XP_024965069.1agamous-like MADS-box protein AGL29	MADS	Type I/II	Mα	AGL29		Mα_AGL29_Tof-g11476/g37222	4436749/92992	4437349/93592	1	t1	t1	600	1	600	Toff_WURv1_g11476/g37222*	Toff_WURv1_g37222.t1	see allele below	a	23
	Toff_WURv1_g39059	SS_200000100819	complement(60941..61630)	XP_023751584.1agamous-like MADS-box protein AGL29	MADS	Type I	Mα	AGL40		Mα_AGL40_Tof-g39059	60940	61630	1	t1	t1	690	1	690			ATGTCCGGCGTCAATTGCATGAAGAATAAGAGGTCGTCAGCAGGCCGGAGGAAGATTGAAATAAAGAAGATAGAAGAAGTAAACAACCGGCAAGTGACCTTCTCCAAACGCCGCCACGGCCTTTTCAAGAAAGCCGCCGAACTTTGCATCTTAACCGGAGCCCAGATCACCATCCTCGTCCACTCACCTGGCGGCCGTGTATTCGCATTCGGCCACCCCACCGTCGACGGCCTTGTCGACCGCTTCCTCAACAACGCATCAACGTCAGAAGGATCAACATCAACCACCGAAAAGCGACAACAAGACAAGGACTTCAACCAACACAACCAACACTATGTGGAGGTCTCGAAGGAGCTGGAGGCGGAGAAGAAACGGAGAGAGGTGATTCAGGAGTCCAAA…				11	S1 S2
	Toff_WURv1_g77247	SS_20000011830	join(1457982..1458152,1458279..1458338,1458394..1458525)	XP_023734691.1agamous-like MADS-box protein AGL62	MADS	Type I	Mα	AGL40		Mα_AGL40_Tof-g77247	1457981	1458525	1	t1	t1	544	3	363			ATGACTTCATCTAATCTTCCACAAATGCCTCCACTGACCAAAGGACGACAAAAGATTGAGATCAAGAGAATTGATGATCAACAACGATTGTTGGTTTCTTCCACAAAAATACATGCTGGTCTTTTCAAAAAGGCTAGTGAGATTTCCACCCATTATGGTATAGAGATGGCAGTAATTGTCTTCACTCCAACCAAAAAGCTACTGACGTTTGGACATCCATCTATATTTAGATGGTTCTAGATCTTTTCAGCAAAACTAAAACCCTCTTGAAGTTTAAGAACATCTGAACTTATGCAGCTCAGCAACTTGCTTGGTCAACTGGAAGCTGCAAAAAGGAACGATGAAGAATTTAAGAAGGTACAGAAAGCAAGGTAACAAATGTTTTTGTGGGATGTTCCT…
	Toff_WURv1_g40387/g40775*	SS_200000113693/s319_494470_512826	42296..42961/11219..11884	PWA81446.1Transcription factor	MADS	Type I	Mα	AGL61		Mα_AGL61_Tof-g40387/g40775	42295/11218	42961/11884	1	t1	t1	666	1	666	Toff_WURv1_g40387/g40775*		see allele below	i			1	F0 S0
	Toff_WURv1_g40380/g40384*	SS_200000113693/SS_200000113693	complement(join(1532..1585,1855..2466))/join(27842..28122,28179..28452,28722..28775)	XP_023763222.1agamous-like MADS-box protein AGL62	MADS	Type I	Mα	AGL62		Mα_AGL62_Tof-g40380/g40384	1531/27841	2466/28775	1	t1	t1	935	2	666	Toff_WURv1_g40380/g40384*		see allele below	g	121		11	S1 S2
	Toff_WURv1_g40385/g40774*	SS_200000113693/s319_494470_512826	36030..36695/8039..8704	XP_023763224.1agamous-like MADS-box protein AGL62	MADS	Type I	Mα	AGL62		Mα_AGL62_Tof-g40385/g40774	8038/36029	8704/36695	1	t1	t1	666	1	666	Toff_WURv1_g40385/g40774*		see allele below	h	20		4	F1 F2
	Toff_WURv1_g31594	SS_200000754	complement(652950..653636)	XP_023733250.1agamous-like MADS-box protein AGL62	MADS	Type I	Mα	AGL62		Mα_AGL62_Tof-g31594	652949	653636	1	t1	t1	687	1	687			ATGGTTATGTCTGATGTCGCCGGCGATAACAAGAAAACGACTAGAGGCAAGCAAAAGATTAAGATAAAGAAGATAGAAGATCCCAACAGCCGTCAAGTCACCTTCTCCAAACGCCGTACCGGACTTTTCAAGAAAGCTGCTGAGATCTGTGTCTTGACCGGAGCCCAAATCGCCATCCTCGTTAGTTCCCCTGGTGGTCAGGTCTATGCATTTCGCCACCCTAATTCCGACGTTCTGTTTGACCGCTATCTGAATAATGACAACAAAGTCGCCACCGCAACCAGCAACACGGAACCAGAGACGGCGACCACCAAAAACAATCAACCGCCGCTGCCCATAAGTGAGTTCAATCAGCATTACGTGGAGGTTTCACGGGAGGTGGAGGCTGAGAAGAAGCGG…		16		3	F1
	Toff_WURv1_g31595	SS_200000754	complement(657637..658323)	XP_023733250.1agamous-like MADS-box protein AGL62	MADS	Type I	Mα	AGL62		Mα_AGL62_Tof-g31595	657636	658323	1	t1	t1	687	1	687			ATGGTTATGTCTAATGTCGCCGGCAATAACAAGAAAAGGACTAAAGGCCAGCAAAAGATTGAGAAAAAGAAGATAGAAGATCCCAACAGCCGTCAAGTCACCTTCTCCAAACGCCGTACCGGACTATTCAAGAAAGCGGCTGAGATCTGTGTCTTGACCGGAGCCGAAATCGCCATCGTCGTTAGTTCCCCTGGTGGTCGGGTCTATGCATTTCGCCACCCTAATTCCGACGTTCTGTTTGATCGCTATCTGAATAATGACAACAAAGTCGCCACCGCCATCAGCAACACCGAACCAGAGACGGAGACCACCAAAAACAATCAACCGCCGCTGCCCGTACACGAGTTCAATCAACATTACGTAGAGCTTTCAAGGGCGGTGGAGGCTGAGAAGAAGCGG…				1	F0 S0
	Toff_WURv1_g35034	SS_2000004114	complement(join(545214..545235,545321..545979))	XP_023733250.1agamous-like MADS-box protein AGL62	MADS	Type I	Mα	AGL62		Mα_AGL62_Tof-g35034	545213	545979	1	t1	t1	766	2	681			ATGGTTATGTCTAATGTCGTCGGCAATAACAAGAAAAGGACTAAAGGCCAGCAAAAGATTGAGAAAAAGAAGATAGAAGATCCCAACAGCCGTCAAGTCACCTTCTCCAAACGCCGTACCGGACTTTTCAAGAAAGCGGCTGAGATCTGTGTCTTGACCGGAGCCCAAATCGCCATCCTCGTTAGTTCTCCAGGTGGCCGGGTCTATGCATTTCGCCACCCTAATTCCGACGTCCTGTTTGATCGCTATCTGAATAATGACAACAAAGTCGCCACCGCCATCAGCAACACCGAACCAGAGACGGCGACCACCAAAAACAATCAACCGCCGCTGCCCATAAACGAGTTCAATCAACATTACGTAGAGCTTTCAAGGGCGGTGGAGGTTGAGAAGAAGCGG…		144		3	F1
	Toff_WURv1_g37537	SS_20000011830	complement(1447848..1448405)	XP_023734691.1agamous-like MADS-box protein AGL62	MADS	Type I	Mα	AGL62		Mα_AGL62_Tof-g37537	1447847	1448405	1	t1	t1	558	1	558			ATGGCTTCATCATCCAATCCTCCACAACTCCCTAAACTGACAAAAGGACGGCAAAAGATTGAAATGAAGAAAATCGATGATGAGAAAAAACTGAAGGTTTGTTTCTCAAAAAGGCACACTGGTCTTTTTAAAAAGGCGAATGAGTTATGCACCCTTTGTGGTGTAGAGATGGCAATAATCCTATTCTCCCCAACCAATAAGCCATTTTCATTTGGCCATCCATCTCTTCAGACGGTCATACATCGCTTCTTTCAGAACCAAGATCCTCCAGCTGAAAGTTCAAGAACGTCTGAGCTGATGCAGCAATATCGCGATCACCGTGCCCTAGAACTCAACACGCAGTTTACCAACTTGCAGGGTCAACTGGAAGCTGCGAAAAAGACGGGTGAAGAACTTAAG…		46		1	F0 S0
	Toff_WURv1_g37538	SS_20000011830	complement(1477948..1478469)	XP_023734691.1agamous-like MADS-box protein AGL62	MADS	Type I	Mα	AGL62		Mα_AGL62_Tof-g37538	1477947	1478469	1	t1	t1	522	1	522			ATGCCTCGACTGCCCAAAGGAAGACAAAAGATTGAGATGAAAAGAATACCCAACAAGCAAAGCTTGTTGGTTTCTTTCTCAAAAAGATATCAAGGCGTCTTCAAAAAGGCCAGTGAGCTTTGCACCCTTTGTGGGGCGGAGATGGCAATCATAGTCTTCTCCCCAACTCACAAGGTGTGCGCATTTGGCCACCCATCTATTCAGATGGTTTTAGATCGATTCCTGAATCAAAATCGTCCTGAAACTTCGGTAACATCTCACCTTGTGCAACAGTATCGCAATAACACCATTAAAGAGCTGAACATGCTGCTCGCCAACTTGCTTGGTCAATTGGAAGCTGCAAAAAAGACCGGCCAGGAACTTACCCAGATAAGGAAAGCTAGAAATCAAGAGATTTTT…
	Toff_WURv1_g17380	SS_270	477532..478368	XP_024979035.1agamous-like MADS-box protein AGL82	MADS	Type I	Mβ	AGL47		Mβ_AGL47_Tof-g17380	477531	478368	1	t1	t1	837	1	837			ATGGGTCGTGCAAAGCTAGATATGAAATTCATAAAGAAAGAGAAGACCCGAAACACGACCTTCGAGAAAAGAAAAAATGGAATGTTAAAGAAAGCTGACGAATTCAAAACTCTTTGCGACGTTGACACGGCTGTGATCATATACCCTCCGAACTCCAAAACCCCGCAGATTTGGCCGCAAAACCCAGATGTAGTCAAGAACTCCATTGCGTCTTACAAAGCAAAATACGAAAACGGGAAGCGAAGTTATGGCGTCATAGATTACTTTGAGGAACGAAAGAAAAAGATGGAAGATGAGCTTGTGAAGGCGCGAAAAAGAAACATGGAAGCCAAGTACGCGACATGGTTTGACGAGCTTGATGGGTTATCTGAAGGGGAATTGAGACATTTCGCTATGGGT…		41		1	F0 S0
	Toff_WURv1_g37903	SS_20000015799	247837..248658	XP_023730235.1MADS-box transcription factor 56-like	MADS	Type I	Mβ	AGL47		Mβ_AGL47_Tof-g37903	247836	248658	1	t1	t1	822	1	822			ATGGGGAGGGCAAAGCTTAAAATGGAACTTATTACGAAAGAGAAGACGCGTTACACAACTTACCAGAAAAGAAAACAAGGAATAATCAAGAAAGCCAGCGAATTCACCATTCTTTGCGATGTCAACACTGTCATCATCATCTACCCTCCCAACTCCGACGAGCCGGAGATATGGCCGCAAAACCCTGATCAAATCAAGAAAACCATCGCCTCTTACAAAGCCAAAAAGAGCGATAACGGGAAGAGAAGTTACGACCTCAACGATTTCTTTGAAGATCGAAAGAAGAAGATCGAAGATGAGCTTCTCAAGGCTCGAAAAAGAAACATGGAAGCCAAGTACGCGACGTGGTTTGACGAGTTCGATGGTTTATCGGAAGGGGAATTGAGACAGTTCGCTATG…		18		1	F0 S0
	Toff_WURv1_g21518	SS_387	complement(489436..490134)	XP_024995319.1agamous-like MADS-box protein AGL80	MADS	Type I	Mγ	AGL38		Mγ_AGL38_Tof-g21518	489435	490134	1	t1	t1	699	1	699			ATGCCAAGGCACAAAGTGAAGCTTGCCTTCATTACCGAAACTTATGCAAGAAGGGCCTCTCTCAAGAAAAGGAAGGATAACTTGAAGAAGAAGTTGAACGAGATATGCACTTTGTGTGGTGTTGACGCATGTGCAATCATGTATAACAACTCCCACGAGTCTCGTCCTGATTTGTGGCCGAGTAGGAGGGGTGTTCAAAACGTGCTGGAGAAGTTAAACGACATTCCCGATATACAAAGGGGAAAAAAGATGTTTGATCATGATGAGTACATCAAGAAAAGGATCACAAAGATGGAGGACATGGTCATGAAGCAAATCAGGGAGAACAGGGAGATGGAGATGGCTAACAAGATGTCAGAATGCTTAAGTGGAGAAAGCTCATTGGCTATGCTAAGCACA…		26
	Toff_WURv1_g57693	SS_188	7717052..7717534	XP_023755414.1agamous-like MADS-box protein AGL80	MADS	Type I	Mγ	AGL45		Mγ_AGL45_Tof-g57693	7717051	7717534	1	t1	t1	483	1	483			ATGACTCGTTCGGTTGTGAAGTACCAATTTGTGGCTAATGAAAGAGCAAGGAACACAAGCTTACATAAGAGAAAAGCGAGTTTGTTTAAGAAGATTAATGAATTGAAGTGTTTGTGTGACATCGATGCTTGTCTTGTGATGTATGAGAAAGACGACTCTCCACCTGAAGTTTGGCCTTCGCCTTCTGAAGCACAACGTGTGATGCAAAAGTTTCAAAAATCAAGAGTCTTGGGATCAAGTGCTATGCTTGATCAGAAGGCTTTTCTCGAGAAAAACATAATGAAAACGAAGAAGCATTTGGAAAAGGAGAAAGAGAAGAATGCGAAACGTTCGATGTTAACATGCTTGTTTGATGAGAACAATCGAGAGAATTTTGAAGGATTGAAGAGTTGCATTGAA…		35
	Toff_WURv1_g32612	SS_200000912	complement(247524..248249)	XP_023736425.1agamous-like MADS-box protein AGL80	MADS	Type I	Mγ	AGL80		Mγ_AGL80_Tof-g32612	247523	248249	1	t1	t1	726	1	726			ATGACTAGGAAGAAAGTCAAGCTTGCCTTCATAACCAACGACTCATCAAGGAAAGCAACCTTCAAGAAAAGGAAGAAAGGTTTGATGAAGAAAGTGAACGAGTTGAGTACCTTATGTGGCATTGATGCATGCGCCATCATATACAGCCCATATGAAACTCAACCCGAGATCTGGCCCAACAACATCGGCGTCCAACATGTGCTTGCTCAATTTAAGAAGGTCTCTGAAATGGATCGAAGCAAGAACATGCTGAATCAGGAAAGTTTCATCAGGAAACAGATCGGAAAGGCGAATGAGCAGCTCAAGAAGCAGATGAAGGAGAATCGCGAGAAGGAGATGACGGAGGTCATGTACCAATGTTTGACCGGAAAAGGCTCGTTAGAGAATTTGAGTCTGGCC…		40		1	F0 S0
	Toff_WURv1_g32613	SS_200000912	join(274514..274886,274966..275210)	PWA71376.1transcription factor	MADS	Type I	Mγ	AGL80		Mγ_AGL80_Tof-g32613	274513	275210	1	t1	t1	697	2	618			ATGACTAGGAAGAAAGTGAAGCTAGCCTTCATAACCAACGACTCGGCAAGGAAAGCAACCTACAAGAAAAGGAAGAAAGGTTTGATGAAGAAAGTGAACGAGTTGAGTACCTTATGTGGCATTGATGCATGTGCCATCATATATAGCCCATATGAAACTCAACCCGAGGTATGGCCCGAAAATAACCGCTTCCAACATGTGCTTGCACAGTTTATGAGGGTGCCAGAAATGGAGAGAAGCAAGAACATGTTGACATTAGAGAGCTTCACTAGGAAAATGATCATTAAGACCAATGGTCAACTCAAGAAGCAAATGAAGGAGAATCGGGAGAAGGAAATGAAAGAGGTCATGTACCAGTGTTTGACTGGAAAAGGTTCGATAGAAAATTTGAGCCCTCAA…				2	F0 S0 S1 S2
	Toff_WURv1_g82829	s1514	complement(join(199498..199590,199664..199765,199877..199897,199964..200005,200090..200098))	XP_023749671.13-hydroxyisobutyryl-CoA hydrolase-like protein 3	MADS	Type I	Mγ	AGL90		Mγ_AGL90_Tof-g82829	199497	200098	1	t1	t1	601	5	267			ATGCATCAGGTAAGATAAGATAAAGCATTAAAGGGGCTGTTTCTTTTTCACTTAATTTCGACAGAATGACTTAATCCTATTTGTTATTGGCAGTTTCACAATGGGCAACAGATGCTCTTTTGGGGATTAAAAAAGGTGCTCCATTTTCTCTTTTTCCTTACACAAACATATTTCTCTAGAGTGGCATCTGCATGCAGAAAGAAGGAACATGAATTATCCACGGTGAGTTAGTTGTAAAATACTCCTATTATCTATTAAAGCGAAATTTGTTGAAATTTATATTGTTATATGTGCTGATTTTTGTTTTGTTGTATATAATAATAATAATAATAGTTAAATGGTGTTATGAAAATGGAATACCGGATTGCTGTAAGGTCTTGTTTAAGAAGTGATTTTGCT…				3	F1
	Toff_WURv1_g14799	SS_205	complement(join(158237..158354,158959..159080,159325..159366,159574..159615,159705..159804,159898..159962,160117..160192,174064..174248))	XP_024990846.1truncated transcription factor CAULIFLOWER A	MADS	Type II	AP1/FUL	AGL7		A1_AP1_Tof-g14799_Ls55	158236	174248	2	t1	t1	16012	9	711			ATGGGGAGAGGAAAGGTACAACTTCGGAGGATAGAGAACAAGATTAACAGGCAGGTGACTTTCTCGAAGAGGAGAGGCGGGCTGTTGAAGAAAGCTCATGAGATCTCGGTTCTCTGTGATGCCGAAGTTGCCTTAATTGTCTTCTCCAACAAAGGAAAACTCTTTGAGTTTTCCACCGACTCATGGTACCCCCTCCCCTAACTTCCTTTCCTCTTTTATACATATATTTTCTATATATATTTTTTCTACTAGGGTTCTAAATCTGTAACAGTTTTCAAGGCTTCTTTCCAAAAACACTCGCTCTACCATACAAACCTAAAACCAAAAAAATTAAAGTTATTTAATAATTTAAATCTCACCCACTTTTCGGATCGTAAAAAAATAATAAGATGAACCAAT…		1		10	F3 F7
	Toff_WURv1_g10436	SS_170	join(1672286..1672470,1674677..1674755,1675018..1675082,1678201..1678300,1678373..1678414,1678833..1678874,1679119..1679243,1679372..1679468)	XP_023729203.1truncated transcription factor CAULIFLOWER A-like	MADS	Type II	AP1/FUL	AGL7		A2_AP1/FUL_Tof-g10436	1672285	1679468	1	t1	t1	7183	8	735			ATGGGGAGAGGGAGGGTGCAGTTGAAGAGGATCGAAAACAAGATTAGCAGACAGGTGACTTTCTCCAAAAGAAGAACAGGATTGTTGAAGAAAGCTCATGAGATCTCTGTGTTGTGTGATGCTGATGTTGCTCTCATTGTTTTCTCTACAAAAGGCAAACTCTTTGAGTACTCCACTCACTCCAGGTTCATCCTTTTTCTATTTCTTTTTAACTTGTACTTTCTTGTTTATATACTGGTTAAACATAATCTTGGCTGCTGTTAAAAAAAAGAAAGAAAAAAAAAACATAATCTTGGCTGAATTAAAGTCTGTATACATATATAAGTAACACCCACCTCAAATCATTTCGTTAGATAGAAAAATAATTTGAACCCATGACTACAGATTGGAGTGTCTGTA…		1
	Toff_WURv1_g40602/g40612*	s2081/s2081	join(20107..20291,22290..22368,22627..22691,25402..25501,25592..25633,25796..25837,25987..26111,26184..26289)/complement(join(62351..62456,62528..62652,62802..62843,63007..63048,63139..63238,65910..65974,66233..66311,68312..68496))	XP_023771445.1truncated transcription factor CAULIFLOWER A-like	MADS	Type II	AP1/FUL	AGL8		A2_AP1/FUL_Tof-g40602/g40612	20106/62350	26289/68496	1	t1	t1	6183	8	744	Toff_WURv1_g40602/g40612*		see allele below	j	1		2	F0 S0 S1 S2
	Toff_WURv1_g48081	SS_18	join(123662..123846,126968..127172)	EXB77654.1Agamous-like MADS-box protein AGL8-like protein	MADS	Type II/I	AP1/FUL	AGL8		A2_AP1/FUL_Tof-g48081	123661	127172	1	t1	t1	3511	2	390			ATGGGAAGAGGGAGAGTGCAATTGAAGCGGATCGAGAACAAAATAAGTAGGCAAGTCACGTTCTCGAAACGAAGAACAGGATTATTGAAGAAAGCGCATGAGATCTCAGTTCTTTGTGATGCTCATGTTGCTCTCATCGTTTTCTCTTCAAGAGGAAAGCTGTTTGAATACTCTAATAACTCCAGGTATTCTTCGTCTTCTTCGATCTACTTCAATCTCCATATAATCTAAAGGCGTACGTCGTTTTTTCATTTCATGTTTTCTGTGTTAATTAATTAGTTGTTACTGCATGCTTTGATGTGTTCAAGGAACTTAAAATCGAGTTATGAATCGATTAAATGTTACTTGGAATAGAAATCACTGGTTCTTCCATTCATAACGAAAAGGTTTTTTTAGTAA…		1
	Toff_WURv1_g12885	SS_187	complement(join(1975954..1976056,1976137..1976267,1976800..1976841,1976947..1977046,1977132..1977196,1977288..1977366,1984276..1984460))	XP_023764283.1truncated transcription factor CAULIFLOWER A-like isoform X1	MADS	Type II	AP1/FUL	AGL8		A3_AP1/FUL_Tof-g12885	1975953	1984460	1	t1	t1	8507	7	705			ATGGGGAGAGGAAGGGTGACGTTGAAGAGGATAGAAAACAAAATCAATCGGCAGGTGACTTTTTCGAAACGGAGGTCGGGATTATTGAAGAAAGCTCATGAGATCTCCGTTCTCTGTGACACCGATGTCGCACTCATCGTCTTCTCTACTAAAGGAAAGCTCTGCGAGTACTCTACCGATTCCTCGTACGTTCTCCTTAATTCATCTCCGTTTCTTACTTTCTCAGATTTTCATCATTACATATCGTTGATTTTTTCCTCTCCGTTGAAATTAAAGTCTTTGTTTTGACATAAGATTGTTTTTTTTCCTTACTACGTACCAATACAAATTCATGGAATTCATGCACGCTTTTCTTCTACGAATCGAGTTCAATCACGATCTTTATACAACAGTCATTTC…		1		4	F1 F2
	Toff_WURv1_g25593	SS_200000216	join(541973..542157,555830..555908,555984..556048,556109..556208,556288..556329,556392..556433,556522..556610,556719..556809)	XP_024976378.1truncated transcription factor CAULIFLOWER A isoform X2	MADS	Type II	AP1/FUL	AGL8		A3_AP1/FUL_Tof-g25593	541972	556809	1	t1	t1	14837	8	693			ATGGGGAGAGGAAGGGTGACGCTGAAGCGGATCGAAAACAAGATCAATCGCCAGGTCACCTTCTCCAAACGAAGGTCTGGATTGTTGAAGAAAGCTCATGAGATCTCAGTTCTTTGTGATGCCGATGTCGCTCTCATCGTCTTCTCCACTAAAGGAAAGCTCTGCGAGTACGCTTCCGATGCTTCGTAAGTCCTCTATCTCTCTCTATCTCTCTCTATCTCTGTCTCTATATCTATCTCCCTAATTTTTCATCAGTTTATTGCTTCGGAAACGTTTAATTTGTTCAAATCGCTTTCTGTTAGTATTGTTTCGCTAAGTTAGATGAAGAACTAAATCATCAATATTAACTTCATCATCAAGTATGTTTGGGTTTATTTGGCGAATAAAGTCAACCATCGA…		1		1	F0 S0
	Toff_WURv1_g12873	SS_187	complement(join(1711280..1711342,1711418..1711459,1711806..1711847,1711945..1712044,1712128..1712192,1712276..1712348,1718121..1718305))	XP_023740833.1truncated transcription factor CAULIFLOWER A-like	MADS	Type II	AS-MADS	LsMADS16	To_ASMADS_1	A4_ASMADS_Tof-g12873_Ls16	1711279	1718305	1	t1	t1	7026	7	570			ATGGGGAGAGGGAAGGTGGAGCTCAAGCGGATCGAAGACAAGAGCAGCCGTCAAGTCTCCTTTTCTAAGCGACGGAATGGATTGATGAAGAAATCTCATGAGCTGACGGTGCTGTGCGACGTTGACGTTGCTCTTTTCATCTTCTCCGGCAAAGGCAGACTCTATGAGTTCTCCACTGGTGAAAGGTACACGCGATTTCGTCTGGGCATGGGAAATCATATTCGCTTCTCGTTTTTACTTATTTGTCATCACCGCTTTTTAAAATCGATATTTTTGTAAGATTCTCTGTTTCATATGTCACGGAGACTTCGATCTTCGGTGATAAAGTCACTATCCTTTTTAACCGGGAAGAGATTTTGCTTGTCGCTTCTCTTATACGTGAAGGCAGGGTTTAATTTT…		1		1	F0 S0
	Toff_WURv1_g75347	SS_2000004083	join(176834..177018,177313..177424)	KVI09231.1Transcription factor	MADS	Type II/I	AS-MADS	LsMADS16	***	A4_ASMADS_Tof-g75347_Ls16	176833	177424	2	t1	t1	591	2	297			ATGGGGAGAGGGAAGGTGGAGCTCAAGCGGATCGAAGACAAGAGCAGCCGTCAAGTCTCGTTCTCTAAGCGACGGAGTGGATTGATGAAGAAATCGCATGACCTCGGGGTGCTGTGCAACGTCGACGTCGCTCTTTTCGTCTTCTCCGGCAAAGGCAGGCTATATGAGTTCTCGACTGATGACAGGTACACGCGATTTTGTTTGGGATATGGAAATCATATTCACTTCTCCTTCTTATCAACATCATCAACCGATCATTGCCGTTTTTAAATTCGACCTTTCTATATGAGTACTCTTCGTGTCATATATATGTCACGGAGACTTCGATCTTCGGTGATGAAGTCCCTATTCTTCTCAACCGGGAAGTGATTTTGCTAGTTTATACGTGAAGGGAGGATT…		2	6	1	F0 S0
	Toff_WURv1_g8985/g40264*	SS_146/SS_200000104812	complement(join(32143..32241,32387..32431,32513..32542,33141..33240,33356..33417,34046..34112,34271..34458))/join(78251..78438,78600..78666,79301..79362,79487..79586,79681..79710,79791..79835,79981..80079)	XP_023762568.1floral homeotic protein PMADS 2-like	MADS	Type II	PI	PI		B1_PI_Tof-g08985/g40264_Ls03	78250/32142	80079/34458	1	t1	t1	1829	7	591	Toff_WURv1_g8985/g40264*	Toff_WURv1_g8985.t1	see allele below	m	10		3	F1
	Toff_WURv1_g9004	SS_146	join(398268..398455,398610..398676,399144..399205,399289..399388,399503..399532,399624..399668,399755..399853)	XP_023762568.1floral homeotic protein PMADS 2-like	MADS	Type II	PI	PI		B1_PI_Tof-g09004	398267	399853	1	t1	t1	1586	7	591			ATGGGGAGAGGAAAGATAGAGATCAAAAGGATAGAAAACACTAGCAACAGGCAAGTGACCTACTCAAAGAGAAAAAATGGAATCATCAAGAAAGCTAAAGAAATCACTGTTCTTTGTGATGCTAATGTCTCTCTTGTTATCTGCGGCTCTTCCGGAAAGATGTATGAATACTGTAGCCCCAAAACCAAGTATGTACCTCCAGAATTTCGCTTTTGTGTTTTAGGGTTTTCATTCTTTTGATCATAGCTTTTTTGTTTTTCCATGTTTAGCTCAAGTTTCTGTTTGTGGGTTGTTGCTAATTATATGTTTGTTTTCATTTTGTGTAACGATTTAAATTGGAAGCTTGATTGACATGCTGGATCGATACCAAAGGCTTTCTGGAAATAAGTTGTGGGATGC…		10		4	F1 F2
	Toff_WURv1_g23268	SS_20000095	complement(join(767103..767276,767525..767569,767920..767961,768715..768817,768921..768982,769053..769119,769246..769433))	XP_023749164.1floral homeotic protein DEFICIENS-like	MADS	Type II	AP3	AP3		B2_AP3_Tof-g23268__Ls30	767102	769433	1	t1	t1	2331	7	681			ATGGGTAGGGGGAAGATAGAGATAAGGAAGATAGAAAATAATACAAACAGACAGGTGACATACTCAAAGAGAAGAAATGGGATATTCAAGAAAGCTCATGAGCTTACTGTTCTCTGTGATGCCAAGGTTTCTCTTATTATGTTCTCCAATACTGGCAAGTTCCATGAGTATATCAGCCCTTCCACCACGTACGTATATATATATATATATACACTCCCTCCTGTATCTATATCTCTTTTACCACCCTTTTGCTTGCGTTTAAGAACTCGGTTTCATCTCTTCATATAATCTTGATTTTAGTGCAATTTAAACAGGACTAAAAAGATGTATGATATGTATCAAACAACTCTAGGTTTTGATCTCTGGAGCTCCCACTATGAGGTTCTTTTCTCTCTAATG…		5		6	F2
	Toff_WURv1_g25644	SS_200000216	complement(join(1057455..1057649,1057772..1057816,1057958..1057999,1058129..1058228,1058371..1058432,1061815..1061881,1061995..1062182))	PWA58724.1MADS-box transcription factor CDM19	MADS	Type II	AP3	AP3		B3_AP3_Tof-g25644	1057454	1062182	1	t1	t1	4728	7	699			ATGGCGAGAGGAAAGATCCAGATAAAGAAGATAGAGAACTCGACAAACAGGCAGGTGACGTATTCCAAGAGGAGGAACGGATTGTTTAAGAAGGCGAGTGAGCTCACTGTGTTGTGTGATGCTAAGGTGTCGATTATCATGGTCTCCTGTACTGATAAGCTTCACGAATACATCAGTCCTTCCATTACGTACGTATTAGATTTAGATCGAAGTTTCTGTAGTACACTAGTACTAGCTAATTACTAAATAATCAGTTCTTATTAATTTTGATTGTGCGCTTCTGGATGAATGTTCGGATCAGGATGAAGCAGTTTTTTGATCAGTATCAGAAGGTATCAGGAATCGATCTGTGGAACTCTCATTATCAGGTAAGTATTTTCATGATAGGCAAGTTCGCAA…		5		3	F1
	Toff_WURv1_g12790	SS_187	complement(join(30312..30491,30590..30634,30714..30755,31201..31300,31375..31436,33029..33095,33181..33368))	XP_023738353.1floral homeotic protein PMADS 1	MADS	Type II	AP3	AP3/TM6		B3_TM6_Tof-g12790_Ls51	30311	33368	1	t1	t1	3057	7	684			ATGGCGAGGGGAAAGATCCAGATCAAGAAGATAGAGAACTCAACCAACAGGCAGGTCACGTATTCCAAGAGGAGGAATGGATTGTTCAAGAAGGCGAGTGAACTCACGGTGTTGTGCGATGCTAAAGTCTCCATTATCATGGTCTCATGTACTGATAAGCTTCATGAGTACATAAGTCCTTCCATCACGTACGTTATCGTTATCTCTAGCTAGAAACCCTAACTTTAGGTTTGGTTATCAAGTTCTTACTGATTTTGATTGTGTTTACGGCAGGACGAAGCAGTTCTTCGATCAGTATCAGACGGCATCTGGAATTGACCTTTGGAACTCCCACTACGAGGTTCTTTTTCTTTGCAAATATCATTAATTGCTGTTCTTCGTCTCCCTGTTAGGGTTATA…		5		3	F1
	Toff_WURv1_g16439	SS_253	join(129931..129971,132727..132762,133280..133525,137582..137663,139977..140038,140122..140233,140347..140388,140629..140670,140807..140986)	XP_023732805.1floral homeotic protein AGAMOUS-like isoform X1	MADS	Type II	AG	AG	To_AG_CL1	C1_AG_Tof-g16439_Ls69	129930	140986	1	t1	t1	11056	9	843			ATGGTATCATGCCTACAACATGATCATGGTAGGCCTTCGAGGTTCTCAAATGTTGGTTTTCTGCATAACCAGGAAAGTCACATCTGAACCTAATCCATCTTTACTTTTGAGTTTCAAAATCAGTTTTATGTTTTTTATTCCAGTTTTTATTTACAAACAAAATCCCCATATAATGGTTGAAAAATATTTATACTTTTGTCATATTATATTTCACTAACTTTTCAAAACTTTTCCAAATATCATTTCTAATGATAACAATTACTGAATTTGAGAACACGAGAACAAATTTGGATAATTTATTGTTATTGAATCATATGCAGTTAAATATATAAAATTATATGTAATTATATATGTTGGGCGAACATCAACAATCAATACGAAGAATGTTGTGCGGCAAAA…		9	1	3	F1
	Toff_WURv1_g11491	SS_186	join(4608037..4608263,4612014..4612095,4612265..4612326,4612407..4612518,4612608..4612649,4613288..4613329,4613417..4613589,4613681..4613684)	XP_023738865.1floral homeotic protein AGAMOUS-like isoform X1	MADS	Type II	AG	AG	To_AG_CL1	C2_AG_Tof-g11491_Ls44	4608036	4613684	2	t1	t1	5648	8	732			ATGTCGTTTCCAAATGACGAAGGGGAGATGTCGCCTCAGAGAAAATTGGGGAGGGGAAAGATCGAAATCAAACGGATCGAAAACACAACAAATCGACAGGTCACCTTTTGTAAGCGTCGAAATGGTTTACTCAAGAAAGCGTATGAGTTATCTGTTCTTTGTGATGCTGAAGTTGCTCTTATCGTCTTCTCTAGCCGTGGTCGACTTTATGAATACGCAAATAACAGGTAAACTTTCTTGAATTTTGCTTCGATTTTCAAAGAAATCTTGAATCCCACTAAAGGTTGATTTCTGAATCTTCATCTTCATCTTTTTCTCCCGAAAATTGGTTCAAGATGGGAATAATTTGGATTTCTTGATGCCGCGCCTTCTGGGTGTGGAAATAGATGATTGAATGTT…		9	1	3	F1
	Toff_WURv1_g1625	SS_4	join(166278..166459,167889..167973,168071..168132,171782..171881,172214..172255,173532..173573,173810..173979,174414..174417)	XP_023760420.1agamous-like MADS-box protein AGL11	MADS	Type II	AG	AGL11/STK	To_STK_CL4	D1_AGL11_Tof-g01625	166277	174417	1	t1	t1	8140	8	687			ATGGGGAGAGGAAAGATCGAGATCAAGAGGATTGAGAACAACACAAATCGTCAGGTGACCTTCTGCAAAAGGAGAAATGGGCTTCTCAAGAAAGCTTACGAGCTTTCTGTTCTCTGTGATGCTGAGATCGCCTTGATTGTCTTCTCCACTCGTGGTCGACTCTATGAGTATGCCAATAACAAGTAATTTTCTGGATTTTTATGCAACTTTTACACAAGTCTATACATGGATTATGTTTAATTTTTTTTACCATCATCTCTTAATTTATTGGTTATAATATAAACCAACATTTGTACTTGTTAATATACGTAAACATAAACTCACAAAAATTAATTAGACTCTTAATTCCAAATATTTCTCAATGGTTGGTTTGCAAATAACTACAAAAACAAAATTTTG…		29	4	11	S1 S2
	Toff_WURv1_g47577/g72631*	SS_4/SS_200000791	join(2088848..2088890,2090439..2090467,2091001..2091075,2091124..2091203,2092640..2092724,2092826..2092944,2093296..2093308)/complement(join(31956..31968,32169..32230,32332..32416,33883..33962,34011..34085,34629..34657,35254..35257))	XP_023760420.1agamous-like MADS-box protein AGL11	MADS	Type II	AG	AGL11	To_STK_UN	D2_AGL11_g47577/g72631	2088847/31955	2093308/35257	1	t1	t1	4461	7	444	Toff_WURv1_g47577/g72631*		see allele below	l	5		6	F2
	Toff_WURv1_g17003/g64139*	SS_265/SS_370	join(579305..579486,581363..581444,582010..582071,587037..587136,587280..587321,587416..587457,587562..587722,587802..587805)/complement(join(225..285,739..920))	XP_024963778.1agamous-like MADS-box protein AGL11	MADS	Type II	AG	AGL11	To_STK_CL5	D3_AGL11_g17003/g64139	579304/224	587805/920	2	t1	t1	8501	8	681	Toff_WURv1_g17003/g64139*		see allele below	e	143	5	11	S1 S2
	Toff_WURv1_g23621	SS_200000103	join(1072418..1072602,1072717..1072798,1074693..1074760,1074853..1074952,1075158..1075199,1075291..1075332,1075740..1075912,1075984..1076056)	XP_023771535.1agamous-like MADS-box protein AGL9 homolog isoform X1	MADS	Type II	SEP	AGL9	To_SEP3_CL7	E1_SEP3_Tof-g23621	1072417	1076056	1	t1	t1	3639	8	765			ATGGGAAAAGGGAGGTTAGAGTTGAAGAGAATAGAGAACAAAATAAACAGGCAAGTCACATTTGCCAAGAGAAGAAATGGACTTCTCAAGAAAGCTTACGAGCTTTCGGTTCTCTGCGATGCTGAAGTTGCTCTCATCGTCTTCTCCACTCGCGGCAAGCTCTATGAGTTCTCCAGTACCTCAAGGTATAAACCCTAATCATCGTCTTCTTCAATTCCTGCAAATCTTCAGCTAAAAAACTTCGATTTCAATCGGATCACGAAACCCTAAACATCCTGTGTTATGTTTGAAATTGAAAGCATGTTGAAGACACTTGAGAGGTATGAGAAATGCAGTTTCGGTCCACCGGAGCAAAGAAAGCCGGCGAAGGAGGATCTTCAGGTATGTATGATCGGTTTT…		28	7	3	F1
	Toff_WURv1_g15439/g39646*	SS_219/SS_200000101520	join(611123..611307,612870..612948,613187..613248,613349..613448,613563..613604,613721..613762,613856..613992,614090..614192)/join(62041..62225,63806..63884,64121..64182,64283..64382,64497..64538,64657..64698,64794..64930,65024..65126)	XP_023762114.1MADS-box protein EJ2-like	MADS	Type II	SEP	AGL4		E2_SEP2_g15439/g39646	62040/611122	65126/614192	1	t1	t1	3086	8	750	Toff_WURv1_g15439/g39646*	Toff_WURv1_g15439.t1	see allele below	c	1		10	F3 F7
	Toff_WURv1_g40941/g42125*	s68_1540738_1585332/s3678	join(23755..23758,23848..23938,27358..27436,27506..27570,27662..27761,27862..27903,27965..28006,28100..28266,28351..28435)/join(23755..23758,23848..23938,27358..27436,27506..27570,27662..27761,27862..27903,27965..28006,28100..28266,28351..28435)	XP_023728966.1MADS-box protein CMB1-like isoform X2	MADS	Type II	SEP	AGL4		E2_SEP2_Tof-g40941/g42125	3812/23754	8499/28435	1	t1	t1	4687	8	765	Toff_WURv1_g40941/g42125*		see allele below	k			6	F2
	Toff_WURv1_g2224	SS_18	complement(join(33855..33939,36057..36211,36309..36350,36445..36486,36835..36934,37013..37077,37250..37328,38700..38884))	XP_023737701.1developmental protein SEPALLATA 1-like	MADS	Type II	SEP	AGL4		E3_SEP2_Tof-g02224_Ls14	33854	38884	1	t1	t1	5030	8	753			ATGGGGAGGGGAAGAGTGGAATTGAAGAGGATCGAAAATAAGATAAATCGGCAGGTGACTTTTGCTAAAAGAAGAAATGGCCTTCTTAAGAAAGCTTATGAACTCTCTGTTCTTTGTGATGCTGAAGTTGCTCTTATCATCTTCTCAAATCGTGGAAAGCTTTATGAGTTTTGCAGTACCTCCAAGTACACATCTTTACTCTGTTACTATGTTTGTCTCTATGTGTGTGTGTGTGTGTGTTTTCTTAGCAGATCTGATGGAGGTTATGAGTTTCTTGATCTAGGATAAGTGATTTAGATTATTTTAAGTTTTTCTAGACTAAATGGTTTGTGTTTTAGCAAGTTTAAGATTATTTTTTTACGAAAGTTATGAAATTAGGTTTAGTAATCCGGGACATGA…		1		3	F1
	Toff_WURv1_g7936	SS_131	624101..624736	XP_023756253.1floral homeotic protein DEFICIENS-like	MADS	Type II/I	SEP	AGL3		E4_SEP4_Tof-g07936	624100	624736	1	t1	t1	636	1	636			ATGGGACGAGCGAAGCAACACATGGAACCCATCCACAACCACAAGAAACGCAAATTCACATTCCTCAAACGGAAAGATGGCTTACTCAAGAAGGCTTTCGAACTCACAGAACTCTGCGACGTTAATGTCTCCATGACAATCAACATCAACAATCAACAACCCCAACGCTTCCCTCAAGACCCTTCAAAATTCAATGGTGTGATCGATCTTTACAAACGGCATAAGAATATGGAACCTAGGAAGATTCTACATTACAGTTTATCGGATTTCTTGAACGAGAGGAAGAAAAAGATCGTGGAAGAACTTGCTAAGGAGAAAAAGAAGAACATGGAAGCAAAGTACCCGACCTGGTTCGATTTCTTGAACAAGTACTTAGAAGTGGAATTAAGAGAATTCGCG…		57		7	F2 F3
	Toff_WURv1_g56832	SS_186	join(18847236..18847426,18847647..18847824)	XP_024989409.1agamous-like MADS-box protein AGL27 isoform X6	MADS	Type II/I	SEP	AGL3		E4_SEP4_Tof-g56832	18847235	18847824	2	t2	t1	589	2	369			ATGGGGCGGAGGAAAGTTGAAATTAAGCGGATCCAAGATAAGAGTAGCAGGGTAGTGACATTTTCAAAGAGGAGAGCAGGATTATTCAAGAAAGCGAGACAGATTTCTGTGCTCTGTGACGTTGATGTCGCCGTCATCGTATTCTCCGATCGCGGCAAGCTATACGAAGTCTGTAGCGGTCGTACTAACAGGTGCAATTCCTTGTTTCTTATATTATCCAGCAAATCTGTTTATTTCCGTTTTATGAAACTGCTCGTATATATGTGTTCTTTTATCTTTCTCTATAGATAAACTGTAAGGAATTTCTGAAATAATGGGTTTTTCTTTAACGTACTTAACAGTTAACACACAACAGTGATAACAGCATATGCTTAATGTCTATAGATTTTGCTGTTATAA…		34
	Toff_WURv1_g12509	SS_186	join(18804784..18804974,18807829..18807898,18807963..18808024,18808092..18808185,18808283..18808366,18808481..18808546)	XP_024989404.1truncated transcription factor CAULIFLOWER A-like isoform X1	MADS	Type II	FLC	AGL70	To_FLC_5	E4_FLC_Tof-g12509	18804783	18808546	1	t1	t1	3763	6	567			ATGGGGCGGAGGAAACTCGAAATTAAGCGGATCCAAGATAAGAGTAGCAGGGTAGTGACATTTTCAAAGAGGAGAGAAGGATTATTCAAGAAAGCCAGACAGATTTCTGAGCTCTGTGACGTTGATGTCGCCGCCATCGAATTTTCCGATCGCGGCAAGCTATACGAAGTCTGTAGCGGTCGTACGAACAGGTGCAATTCCTTGTTTCTTATATTATCCAGCAAGCTTTTCGATTTCCTTTTTAAGAAACTGTTCGTATATCTTTCTCAATACGGGTTAGATATATATATATATATAAACCGTAATTAAGAAATTTCTGAAATACACGATGAGATTACTACGACATGATTAAGAACTGGGTTTTTCTTTTTAACGTACTTAACACACAACACTGATAAC…				3	F1
	Toff_WURv1_g16963	SS_263	complement(join(152340..152424,152546..152685,152778..152840,152937..152978,153092..153191,153309..153370,153466..153541,156028..156243,156316..156386))	XP_023732929.1MADS-box transcription factor 6-like	MADS	Type II	AGL6	AGL6		E5_AGL6_Tof-g16963	152339	156386	1	t1	t1	4047	9	855			ATGTCGGATGTGAACCAAGAACCTTTAAATTACATCGAATCAACCTCCACCAACTTTGACACACTCCGTTTGTACGTCTTCTGCTCCATTTCTTTCTCCCCTTTTATACAACCGCACCATCTCTTACTTGCAGAGAATTCTAGAGAGAGAAAACACAGAAATACAGAATCCATTGTTATGGGGAGAGGAAGAGTGGAGCTCAAGAGAATCGAGAACAAAATCAACCGACAAGTTACCTTCTCAAAACGAAGAAATGGTCTGCTCAAAAAAGCTTACGAACTTTCCGTCCTCTGTGACGCCGAAGTCGGCCTGATAATCTTCTCCAGCCGTGATAAACTGTACGAGTTCGGCAGCGTCGGGTAAGCACCTCTTGATCACCGGCGATATTGTTGTTGTATG…		4		10	F3 F7
	Toff_WURv1_g34565	SS_2000004020	complement(join(553947..553979,554055..554096,554195..554294,554393..554460,556921..556999,558276..558479,558851..558969))	XP_023770720.1agamous-like MADS-box protein AGL9 homolog isoform X2	MADS	Type II	SEP	AGL9	To_SEP3_CL6	E5_SEP3_Tof-g34565	553946	558969	2	t1	t1	5023	7	648		Toff_WURv1_g34565.t2	ATGTGGCACTGCAACACAACACGCCCTTCGTGTGCATTATTGCGGAGTGACATCCCCGTAAAATCTTCTTCTTTTTACAACTGTCTTCCCCAAGCGAAATTCTCGTATATTATTATAAGGTTTGTATCTTTTAAGAAAATTAGTGTAAATTATTTGAATGATAGAGTGAAAGATAGAAGGGATGTGAAGTGAAAACGTATATATTTAATAAAACTGATATATATTACCTCAATCATAGCTAGCTAGTGTAATATTAAATCATAATTTATATAATTTTCATCATAAAGATATAATACTAGAAAATGAGATTGTAGTTGTGTACGATAAATAGCAAATAACACACTGGTTTCCATTAAGTTAATTAAAAGTTGATAACTGTATCTATATGTGTAAAAGAAG…		2	6	3	F1
	Toff_WURv1_g15985/g72653*	SS_243/SS_200000794	join(65192..65373,68599..68680,77996..78057,78155..78254,78592..78633,86264..86305,86473..86565)/261176..261385	XP_024962343.1agamous-like MADS-box protein AGL12	MADS	Type II	AGL12	AGL12		M_AGL12_g15985/g72653	65191/261175	86565/261385	1	t1	t1	21374	7	603	Toff_WURv1_g15985/g72653*		see allele below	d			2	F0 S0 S1 S2
	Toff_WURv1_g31755/g31756*	SS_200000782/SS_200000782	complement(join(216013..216073,216168..216295,216647..216688,217055..217096,217230..217329,218131..218195,218526..218601,219247..219527))/complement(join(205035..205095,205393..205520,205872..205913,206282..206323,206457..206556,207356..207420,207749..207824,208468..208748))	XP_023731673.1MADS-box transcription factor 23-like	MADS	Type II	AGL15	AGL15		M_AGL15_g31755/g31756	216012/205034	219527/208748	1	t1	t1	3515	8	795	Toff_WURv1_g31755/g31756*		see allele below	f	12		2	F0 S0 S1 S2
	Toff_WURv1_g19016	SS_317	join(59989..60170,61207..61276,61647..61711,61869..61968,62041..62082,62292..62333,62431..62615,62911..63007)	XP_023768196.1MADS-box transcription factor 23-like	MADS	Type II	AGL15	AGL15		M_AGL15_Tof-g19016	59988	63007	1	t1	t1	3019	8	783			ATGGGTAGAGGTAAAATTGAAATCAAGAAGATTGAGAATGTAAGTACCAGACAAGTAACGTTCTCAAAGAGACGTGCTGGTTTGCTCAAGAAAGCTCATGAACTTTCTGTTCTTTGCGATGCTGAAGTTGCTATTATCGTCTTCTCAAATACAGGTCGCCTTTACGAGTTCTCCAGTTCTAGGTATTATTCAAAACCCATTGCATGTGTTTTACGATTCGATTTTCTGTTTCTATTGAAGTTTGTTTTGACTTCGCGTTGTTTTCCTTGTGCGGATTTGAAGTTGCTGCTTGATTTGTCGAACTGATTGAGGGTTTATCTATTAATGAGGGTTATTGATTGATTTAATCTTCCACTGCTTTTTTTTTTTTGGGGGGATTTTTGATGGTTCAATTAAAGT…
	Toff_WURv1_g32934	SS_200000970	complement(join(104539..104554,104630..104805,104879..104962,105045..105086,105185..105284,106658..106719,110764..110846,111006..111090,114700..114775,127099..127288,127633..127671,132045..132199,132285..132475))	XP_023750504.1agamous-like MADS-box protein AGL16 isoform X1	MADS	Type II	AGL17	AGL16		M_AGL17_Tof-g32934	104538	132475	1	t1	t1	27937	13	1299			ATGTCTTCGATGGTGACCTGTTGTGCCGATGACGACGGGCTCGACGGGAATGCAGGGGCTGTCGAGGAAGAGAAGCAGCACCCGGAAGAGAAGCAGCGACCGCCGGAAAACTCGCGATGGGTTCGATGTCGACATCTGCTTCCTGCTCGTCGGCTCCGATTGCAGCGCTGGTTCGTCGGCTCCGATTGCAGGTTGTTGTTTCCTTGAAGCTGTCGCGTGAAGGAGACGAAGAAGAAAGGAGGTGGCGGCCTTCCTTTACCGTCGCATACTTAACAGATTCGGCCCTTCTGAATCGGTTCAGGTGGCGAGGGAAGGTGCGAAGCAGCGATCGATTCAGATGAGAGGTGGGACGGAGGAGAAGGCAGATCGATTCGGCCCTTCTCAATCGGAGGTCGCAGT…		6		3	F1
	Toff_WURv1_g41628	s2165	complement(join(27083..27206,27312..27341,27398..27465,27574..27615,28816..28857,28945..29044,29212..29273,30488..30566,31170..31351))	XP_023754290.1MADS-box transcription factor 23-like	MADS	Type II	AGL17	AGL16		M_AGL17_Tof-g41628	27082	31351	1	t1	t1	4269	9	729			ATGGGAAGAGGAAAGATTGCAATTAGGAGAATAGACAACTCAACCAGTAGGCAGGTGACATTTTCAAAGAGAAGAAATGGGTTACTGAAGAAAGCAAAAGAGTTGGCCATTTTGTGTGATGCTGAAGTTGGAGTCATCATCTTCTCCAGTACCAATAAGCTCTATGAATTCTCAAGTGCAAGGTGTAACATAAACTAATTAATTGAATGTTATTTTGTAATAGAATTTCATATTATTTTTCTTCTATAATCTATCTTCTAATTTTTACTAACTCCCTGATCTCCATTACAAGTAAACCAATTCCTAGCCATACATATAGATGTACATATAGATAGATAGATATTAGTTCGTTTTGATGAAGTCTAGCTTGTTGTTAAAAAACATATAAATAGATACACA…
	Toff_WURv1_g14087/g30672*	SS_193/SS_200000655	join(169939..170120,174632..174710,184294..184355,184496..184595,184712..184753,184827..184910,186307..186425,186513..186516)/complement(join(102512..102539,102620..102738,104115..104198,104272..104313,104430..104529,104669..104730,108184..108262,112319..112500))	XP_023764793.1MADS-box transcription factor 23-like	MADS	Type II	AGL17	AGL21		M_AGL17_g14087/g30672	169938/102511	186516/112500	3	t2	t1	16578	8	672	Toff_WURv1_g14087/g30672*		see allele below	b	13		4	F1 F2
	Toff_WURv1_g25135	SS_200000196	complement(join(341036..341179,341288..341329,343529..343570,343658..343757,343925..343986,345201..345279,345882..346063))	XP_023754290.1MADS-box transcription factor 23-like	MADS	Type II	AGL17	AGL21		M_AGL17_Tof-g25135	341035	346063	1	t1	t1	5028	7	651		Toff_WURv1_g41629	ATGGGAAGAGGAAAGATTGCAATTAGGAGAATAGACAACTCAACCAGTAGGCAGGTGACATTTTCAAAGAGAAGAAATGGGTTACTGAAGAAAGCAAAAGAGTTGGCCATTTTGTGTGATGCTGAAGTTGGAGTCATCATCTTCTCCAGTACCAATAAGCTCTATGAATTCTCAAGTGCAAGGTTTAACATAAACTAATTAATTGAATGTTATTTTGTAATAGATTTTCATATTATTTTTCTTCTATAATCTATCTTCTAATTTTTACTAACTCCCTGATCTCCATTACAAGTAAACCAATTCCTAGCCATACATATAGATGTACATATAGATAGATAGATATTAGTTCGTTTTGATGAAGTCTAGCTTGTTGTTAAAAAACATATAAATAGATACACA…		6		3	F1
	Toff_WURv1_g26695	SS_200000297	join(306758..306939,307527..307605,308783..308844,309016..309115,309203..309262,309828..309869,309989..310132)	XP_023754290.1MADS-box transcription factor 23-like	MADS	Type II	AGL17	AGL21		M_AGL17_Tof-g26695	306757	310132	1	t1	t1	3375	7	669			ATGGGAAGAGGAAAGATTGCAATCAGGAGAATAGACAACTCAACCAGTAGGCAGGTGACATTTTCAAAGAGAAGAAATGGGTTACTGAAGAAAGCAAAAGAGTTGGCCATTTTATGTGATGCGGAAGTTGGAGTCATCATCTTCTCCAGTACCAATAAGCTCTATGAATTCTCAAGTGCAAGGTTTAACATAAATTACTTAATTGAATGTCATTTTGTACTAGATTTTGATATTATTTTTCCTATATAGTCTATCTTCTAATTTTTACTAACTCTGTGATCTCCATTACAAGTAAACCAATTCGTGGCCATATATATAGATAGATAGATAGATACTAGTTCGTTTTGATGAAGTCTTGTCGTTAAAAAACATATAAATAGATAGACACAAACATAGATA…		6		7	F2 F3
	Toff_WURv1_g36065	SS_2000004473	join(565407..565594,565808..565874,565974..566138,566268..566309,566398..566439,566502..566754,567156..567160)	XP_024976188.1MADS-box protein defh21	MADS	Type II	BS	AGL32		M_AGL32_Tof-g36065	565406	567160	1	t1	t1	1754	7	762			ATGGGAAGAGGAAAGATCGAAGTGAAGAGAATTGAGAACAATACTAGTAGGCAAGTGACGTTTTCTAAGAGAAGAACTGGGCTTCTAAAGAAGACACATGAGCTCTCTGTTCTTTGTGATGCTCAAATTGGCCTCATTGTCTTCTCTAGCAAAGGGAAACTTTTTGAGTACGCAACTCAACCTCTCAGGTTCATATATTTTCTTCATTTGTTCTTCAGTTACCACTTTTTGAATACTCAAAAATAAATCTTCATGGTGATTTTAGTTTTGGTTTATATATATATACTCATGTTTTTCGGTTAGCTTTATTAGGGTTTCTTGAATTTGACCAGAGAATTTTCAATATATACATATATGTATCCAAATATATTGTTGTGTTCTTAACATGTGATATGTTAC…		10		11	S1 S2
	Toff_WURv1_g12391	SS_186	complement(join(16952671..16952790,16952997..16953038,16953365..16953406,16953520..16953619,16953699..16953760,16953886..16953955,16966671..16966864))	XP_023741821.1agamous-like MADS-box protein AGL27 isoform X1	MADS	Type II	AS-MADS	LsMADS16	To_FLC_1	M_ASMADS_Tof-g12391_Ls16	16952670	16966864	1	t1	t1	14194	7	630			ATGGGGAGGAGGAAGCTCGAAATAAAGCGGATCGAAGACAAGAGTAGCAGACTTGTGACGTTTTCGAAGCGGAGAACGGGCTTGATTAAGAAAGCACGGCACCTTTCCGTGCTCTGCGACGTCGACGTCGCCGTCATTGTATTCTCCGCTCGCGGCAAGCTGTATGAATTCTGCAGCGGCGATACGGCTAACAGGTGCCTTTCATTCTTTTGTTTTGTATGTTCGATTTCCTCTTTGAAGAACTGTTTCTAGCATTCCTCTCTCTCTCTCTCAGCTCTCTCTCTCTCTCTCTCTCTCTCTCTCTCTATATATATATATATATATATATATATATATATCACCACCTTTAGTTAAACTCTGTATGTGTCTGTTATGACAAAATGAGATTTTTAGGGCACA…		110		10	F3 F7
	Toff_WURv1_g12392	SS_186	complement(join(16980929..16981048,16981255..16981296,16981623..16981664,16981778..16981877,16981957..16982018,16982140..16982209,16989967..16990160))	XP_023741821.1agamous-like MADS-box protein AGL27 isoform X1	MADS	Type II	AS-MADS	LsMADS16	To_FLC_2	M_ASMADS_Tof-g12392_Ls16	16980928	16990160	1	t1	t1	9232	7	630			ATGGGGAGGAGGAAGCTCGAAATAAAGCGGATCGAAGACAAGAGTAGCAGACTTGTGACGTTTTCGAAGCGGAGAACGGGCTTGATTAAGAAAGCACGGCACCTTTCCGTGCTCTGCGACGTCGACGTCGCCGTCATTGTATTCTCCGCTCGCGGCAAGCTGTATGAATTCCGCAGCGGCGGTACGGCTAACAGGTGCCTTTCATTCTTTTGTTTTGTATGTTCGATTTTCTCTTTGAAGATCTGTTATATATATATATATATATATATATATGCTGACACCACCTTTAGTTAAACTCTGTATGTGTCTGTTATGACAAAATGAGATTTTTAGGGCACAAACAGATTATTTTATGTCTATAGCAATATATATAGCATGCATTTTTTTATAATTGGATAG…				10	F3 F7
	Toff_WURv1_g12393	SS_186	complement(join(16995589..16995708,16995893..16995934,16996221..16996262,16996335..16996434,16996558..16996619,16996745..16996814,17003910..17004103))	XP_023740659.1agamous-like MADS-box protein AGL27	MADS	Type II	AS-MADS	LsMADS16	To_FLC_3	M_ASMADS_Tof-g12393_Ls16	16995588	17004103	1	t1	t1	8515	7	630			ATGGGGCGGAGGAAGCTCGAAATAAAGCGGATCGAAGAAAAGAGTAGCAGACTGGTGACGTTTTCAAAGCGGAGAACGGGCTTGATTAAGAAAGCACGACAGCTTTCCGTGCTCTGCGACGTCGACGTCGCCGTCATTGTATTCTCCGCTCGCGGCAAGCTGTATGAATTCTGCAGCGGCGGTACGGCTAACAGGTGCCTTTCATTCTTTCGTATATTCGATTTTCTCTTTCAAAATCTGTTTATAGCATTCCTCTATATATACATGCTCTTGTTCTTTAGGGAGCACCACCACCAGCTTTAGTTATAAACTGTATCTGTAGGTTATATGACAAAATGAGATTTTTAGGGCACAAAAAGATTATTTTATGTCTAGGTATATATAGCATGCACTATTTTA…
	Toff_WURv1_g12508	SS_186	join(18795296..18795500,18801235..18801731,18802852..18802863)	PWA61853.1cytochrome P450	MADS	Type II/I	AS-MADS	LsMADS16	***	M_ASMADS_Tof-g12508_Ls16	18795295	18802863	1	t1	t1	7568	3	714			ATGGGGCGGAGGAAAGTCGAAATTACGCGGATCCAAGATAAGAGTAGCAGGGTAGTGACATTTTCAAAGAGGAGAGCAGGATTATTCAAGAAAGCGAGACAGATTTCTGTGCTCTGTGACGTTGATGTCGCCGTCATCGTATTCTCCGATCGCGGCAAGCTATACGAGGTCTGTAGCGGTCGTCGTACTAAGAGCATCCACAATGGTATAGCTTTTTTAGAGCTTTTTCATGCCAACATATTCATAATAAAAAGCTTCTTAAACTTCCACTATGGTAGAACTTTTTTATTAGAGTTTTTTTATAACACATTGATTATTTAATTATTTTATAACAATAAAAACCTTAATAAAATATAATAAATATAAAAAAAACTTGAATGAAAGACTTTTCTATAGAAA…		34
	Toff_WURv1_g15806	SS_233	join(800937..801127,817354..817435,817563..817612,817698..817803,817928..817969,818065..818106,818185..818319)	XP_023741806.1agamous-like MADS-box protein AGL27 isoform X1	MADS	Type II	AS-MADS	LsMADS16	To_FLC_7	M_ASMADS_Tof-g15806_Ls16	800936	818319	2	t1	t1	17383	7	642			ATGGGGCGGAGGAAACTCGAAATAAAGCGAATCGAAGATAAGAGTAGCAGGCGAGTGGCTTTTTCTAAGCGAAGAGCAGGATTAATCAAGAAAGCAAGGCATCTTTCGGTGGTCTGCGACGTTGATGTCGCCGTTCTTGTATTCTCTGCCACCGGCAAGCTCTATGAATACTGCAGCGGCGGTTCTAACAGGTAACCGTTCATAGCTTTATAGGTTTTCTATAATCTTTTGATTCTCTATTTCAAAACCTTGTTCATATGTTGTTGTTGTATACGTGTGTATGGAATTTGAGCATAACCTCTTAGCCTCTAGGTATTAAACAGTACGAAAGCCTTATCCCTGTTGTACAAATGGTGATTTCTAGGGCTTTAACGAGTGATTTTATGTGTAAGGAACTAA…		56		6	F2
	Toff_WURv1_g75350	SS_2000004083	join(184173..184357,184466..184538)	KVI09231.1Transcription factor	MADS	Type II/I	AS-MADS	LsMADS16	***	M_ASMADS_Tof-g75350_Ls16	184172	184538	1	t1	t1	366	2	258			ATGGGGAGAGGGAAGGTCGAGCTCAAGCGGATCGAAGACAAAAGCAGCCGTCAGGTGTCGTTCTCTAAGCGACGGAATGGATTGATGAAGAAATCTTATGAGCTATCGGTGCTGTGTGAAGTCGACGTCGCTCTTTTCATTTTCTCCGGCAAAGGCAGACTCTATGAGTTCTCGACTGATGAAAGGTACACCTGATTTTGTCTGGGAAATGGAAATCATGATATTCACTTCTCCTTCTTACCGTATTAGATTCATCAACTGATCGCCGTTTTTAAAATCGATATTTCTCTAAGATTCTCCGGTTCATGTGTCACGGAGACTTCGATCTTCGGTGATTCAGTCCTTATCCTTTCAACCGGGAAGTGA				1	F0 S0
	Toff_WURv1_g56982	SS_186	complement(join(21966178..21966199,21966299..21966489))	XP_023741822.1agamous-like MADS-box protein AGL27 isoform X2	MADS	Type II/I	FLC	AGL25	***	M_FLC_Tof-g56982	21966177	21966489	1	t1	t1	312	2	213			ATGGGTCGGAGAAAGCTCGAGATTAAGCGGATCGAAAACAAGAGTAGCAGACTGGTGGCGTTTTCGAAGCGTAGGACAGGATTAATAAAGAAAGCTTGGCATCTTTCCATGCTCTGCGATGTGGATGTCGCCGTCATCGTATTCTCCGCCCACGGGAAGCTATACGAATTCTGCAGCAGCGGTAGTAACAGGTGAGTGTCATATTGCTATATATTCGGCCTGAATTTACAATTTTCTCTTTGAATTGTTCGTATGTGCTCTCGTAATTCTCCGTACATGCTGTTCTGTAGGCAGGATTACCTTCAGTTATAA		2	6
	Toff_WURv1_g12394	SS_186	complement(join(17043769..17043780,17043881..17044236,17044297..17044407,17047300..17047351,17047466..17047513,17047712..17047753,17047924..17048008,17048089..17048150,17048226..17048292,17060063..17060253))	XP_023752455.1agamous-like MADS-box protein AGL27	MADS	Type II	FLC	AGL31	To_FLC_4	M_FLC_Tof-g12394	17043768	17060253	1	t1	t1	16485	10	1026			ATGGGGCGAAGGAAGCTGGAGATGAAACGAATCGAAGACAAGAATAGCAGACAAGTTACGTTTTCAAAGCGGAGATCAGGATTGATTAAGAAAGCACGGCACCTTTCCATTCTCTGTGATGTCGACGTCGCCCTCGTCGTCTTCTCCTCCCATGGCAAGCTCTATGAATACTGCAGCGGAGATGCCGACAGGTCAGTCAGTTCTATATCGTTTTTTGTATATGATTCAACATGGTTCTTTGATTTTACGCTTTCTGCTCTATATACATATGCGCTGTGTGAAATATATATGCTGTTATGTATGGAGCGATAATCTTCGTTTAGTCATAAAACTGTGAGATACCTCTGCAATCGGGATGAAGAATTCTAGGGCACAATAAGCGATTTTGGAAAGTGCATA…				8	F2 F3 F7
	Toff_WURv1_g15710	SS_230	complement(join(160728..160874,160951..161040,161136..161229,161291..161352,161411..161474,176736..176926))	XP_023732397.1agamous-like MADS-box protein AGL27 isoform X1	MADS	Type II	FLC	AGL70	To_FLC_6	M_FLC_Tof-g15710	160727	176926	1	t1	t1	16199	6	648			ATGGGGCGGAGGAAGCTCGAAATTAAGCGGATCAAAGATAAGAGCAGCCGGCTAGTCGCATTTTCAAAGCGGAGAACAGGATTATTCAAGAAAGCACGACAGCTTTCTGTGCTCTGTGATGTTGATGTCGCCGTCGTCGTATTCTCCGATAGCGGCAAGCTCTATGATTTCTGCAGCGGTGGAGCTAACAAGTAGGTGCTTTTCCTTGTTTTCTTATATTATCCAGAAAGTTTTTTTGATTTTCTTTTAAAAAAGTCTTGGTATTTGTTCTTGTATCTTTCTCGATAGATGGTAGCTAGCATCACCTTTAGATACAAACAGTATGGGATCTCTGAAATAGACGAAGGGATTTCTAGGGCATCTTGTTAAACACATGATTAAGCTATCTAGATTTTGCTG…				3	F1
	Toff_WURv1_g25399	SS_200000202	join(817229..817419,824955..825030,825090..825151,825221..825314,825411..825452,825553..825594,825660..825779)	XP_023752455.1agamous-like MADS-box protein AGL27	MADS	Type II	FLC	AGL70	To_FLC_8	M_FLC_Tof-g25399	817228	825779	2	t1	t1	8551	7	621			ATGGGCCGGAGGAAGTTGGAGATGAAGCGAATTGAAGATAAGAACAGCCGGCAAGTCACGTTTTCGAAGCGGAGGGCTGGATTGAACAAGAAAGCACGGCATCTTTCGATTCTCTGCGACGTCGACGTCGCCGTCGTTGTCTTCTCCTCCCGTGGCAAGCTCTATGAATATTGCAGCGGCAGTACGGACAGGTCAGCAATCGCTTTGTGCTTTGCTTAATACTCCGTATTGTATATATCTTTACGCTTTACGCTCTATACACGTGTCCGTATATGCTGTTATGCGTGGAAGCTGCATAATATGAATGGAATTGAAATGTATGTGTATTAGGTTAGTCATGCGAATCCTAGTCAGCGATTTTGGCATGATGAGTGCTGGACTGAAAATTTCCTCTATGTG…				9	F3
	Toff_WURv1_g40335	SS_200000106661	complement(join(207010..207114,207235..207318,207432..207525,207608..207672,207781..207865,219890..220080))	XP_023732397.1agamous-like MADS-box protein AGL27 isoform X1	MADS	Type II	FLC	AGL70	To_FLC_9	M_FLC_Tof-g40335	207009	220080	1	t1	t1	13071	6	624			ATGGGGCGGAGGAAACTCGAAATTAAGCGGATTCAGAATAAGAGTAGCAGGAAAGTGGCGTTTTCAAAGCGTAGATCAGGATTATTTAAGAAAGCACGACACCTTTCTGTGCTCTGTGATGTTGATGTCGCCGCCGTCGTTATCTCCGATAGCGGGAAGGTTTATGAGTTCTCCAGCGGTGATACTAACAGGTACTGAATTTCATTGTTTTTTGTATTACCCAGAAATTTTTTATATTTCTTTTTGAAAAACTGTTCGTATGTGTTGTATCTTTCTTCATAGCATCACCTTTAGATATATATAAACTGTATTGGATCTCAGAAGTCAGAATTACACGATGAGATTTCTAGGGTATTAACACTGATTATGTGTCAAGCTTGCTTAACACACAACGGCGAT…		109
	Toff_WURv1_g6951	SS_108	join(1804898..1805079,1807385..1807466,1807547..1807608,1808560..1808659,1808798..1808839,1808937..1808978,1809071..1809217)	XP_023764337.1MADS-box protein SOC1-like	MADS	Type II	SOC1	AGL20		M_SOC1_Tof-g06951	1804897	1809217	1	t1	t1	4320	7	657			ATGGTGAGAGGGAAGACTCAAATGCGAAGGATTGAAAATGCTACAAGTAGACAAGTGACCTTCTCCAAAAGAAGAAATGGTTTGTTGAAAAAAGCGTTCGAACTCTCTGTGCTTTGTGATGCTGAAGTTGCTTTGATAATCTTCTCTCCAAGAGGCAAACTTTATGAATTTGCAAGCTCAAGGTTCCATTTTTCTCACTCAATTATCATGTTTTCAAGATTCTAATTTCTGGGATTTTTTCATATTCTTGATCTTAATTCTGGGTTTCAAAATTATTTCATGTTTATGATTGCATACATACATATGCGTACACAATCACACACTATATATTAAACGGATCTGATTTTAAATAACATCAAAGAGAACATATGATCATTTAGTTTTTTTGTTGATTCTGAT…		4		3	F1
	Toff_WURv1_g11816	SS_186	complement(join(9359422..9359562,9359723..9359764,9360037..9360078,9360164..9360263,9360401..9360468,9360856..9360937,9362675..9362856))	XP_023730863.1MADS-box protein SOC1-like	MADS	Type II	SOC1	AGL20		M_SOC1_Tof-g11816	9359421	9362856	1	t1	t1	3435	7	657			ATGGTGAGAGGAAAGACCCAGATGAGGAGGATAGAGAATGCTACAAGTAGGCAAGTGACTTTCTCCAAAAGGAGAAATGGTCTATTGAAGAAAGCTTTTGAGCTTTCTGTGCTTTGTGATGCTGAAGTTGCTTTGATTATCTTCTCTCCAAGAGGCAAGCTCTGTGAATTTGCAAGCTCAAGGTGTCATCTTTTTCACTCATTTCTGATTCTTGATTTCTTCCAAAAAAATTCTTTCATGCATATATACCTATACAGACATACATACATATAATATATACAGATATACATATGTTGTATATATGTATGTTTTATGGGTGTTATGCTCTAGTTCTATGTTAATAACTTTAGGGTTTCTTCTTCTTCCCCTCCTCTCACACGCACAAAGAAAACATAGACA…		4		4	F1 F2
	Toff_WURv1_g72928	SS_200000839	complement(join(296064..296109,296206..296387))	XP_023755627.1MADS-box protein AGL42-like isoform X3	MADS	Type II/I	SOC1	AGL20		M_SOC1_Tof-g72928	296063	296387	1	t1	t1	324	2	228			ATGGTGAGAGGAAAAGTTCAGATGAAGAGAATAGAAAACGCAACAAGCAGGCACGTGACTTTTTCCAAGAGAAAACATGGACTTCTAAAAAAGGCGTGTGAGCTTTCGGTGCTTTGTGATGCTGAAGTTGCTTTGATTATCTTCTCTCAAAAAGGCGAACTCCATGAATTTTCTAGCTCGAAGTAAGTCTAATACTCTAATTCCTTTCATCTATCTTCATGCCATCAATTATTCAATTACATATACGCAATAAGATTTTCTTGATAAATTTTGTATAGAATGTGCAAGTCGCTTTACGTGTACAGTTGTAATCATCTTTTTTAA		7		10	F3 F7
	Toff_WURv1_g34755	SS_2000004053	complement(join(158215..158361,158435..158497,158567..158608,158709..158808,158927..158988,159079..159160,160245..160426))	XP_023753340.1MADS-box protein AGL42-like isoform X3	MADS	Type II	SOC1	AGL42		M_SOC1_Tof-g34755	158214	160426	1	t1	t1	2212	7	678			ATGGTGAGAGGAAAGGTTGAACTGAAAAGAATAGAGAACTCAACAAGCAGGCAAGTTACTTTCACGAAGAGGAGAACTGGGCTTTTAAAGAAGGCTTATGAGCTTTCAATTCTTTGCGATGCTGAAGTTTCTTTGATTATTTTCTCTCAAAAGGGAAAACTCTATGAGTTTTCAAGCTCCAAGTACGTGCTTTTAGTTCTTCTTCTTCTCTCTCTCTCTCTCTCTCTCTCTATATATATATATATATATATATATATATATATATTGGTTTCAATTAAGTATCTTCAAGAACTAGATGTGAAAGTACACAGATGTATAGTAGCTCTATCTATATCAAGTCGAAGTAACTAAAACAGCATGCTCCAGTTTTGGTTTAGTTTTTTAAATTTGCAAGATGTG…		7		2	F0 S0 S1 S2
	Toff_WURv1_g21751	SS_398	join(1074616..1074800,1076849..1076927,1077162..1077226,1077336..1077435,1077787..1077828,1078052..1078093,1078318..1078454,1078781..1078802)	XP_023735511.1MADS-box protein JOINTLESS-like isoform X2	MADS	Type II	SVP	AGL22		M_SVP_Tof-g21751	1074615	1078802	1	t1	t1	4187	8	672			ATGATGGCTAGGGAAAAAGTACCGATCAAAAAAATTGACAATGCCGCAGCAAGAAGGGTGACTTTCTCCAAGAGGAGAAGAGGGTTATTCAAGAAAGCCGAAGAGCTTTCTGTACTTTGCGATGCTGATGTTGCTATCATCATCTTCTCCTCTAATGATAAGCTCTTTCACTATTCGAGCTCAAGGTATCTAGTGTGTGTGTGTGTGTGTGTGTGTGTGTTTAAGTGTGTCAGATTGTGGTTTTATTGATATATGTATGTGGGGTTTTCATGATTCTTCTCGTATTCTCTTCTTTTTGGGTCGTAGGGTTAATATATCACTAATTCCACCAATTAGTGTTCTTTATGTAATTGTCTGAATTGTTTATGTGCTTTTGTGTCCTTAATTGGATTAAATTAA…		3		3	F1
	Toff_WURv1_g21753	SS_398	join(1087658..1087842,1088970..1089048,1089320..1089348,1089463..1089562,1089948..1089989,1090215..1090256,1090482..1090621,1090955..1090976)	XP_023735511.1MADS-box protein JOINTLESS-like isoform X2	MADS	Type II	SVP	AGL22		M_SVP_Tof-g21753	1087657	1090976	2	t2	t1	3319	8	639			ATGATGGCTAGGGAAAAAGTACCGATCAAAAAAATTGACAATGCTACAGCAAGAAGGGTTACCTTCTCCAAGAGGAGAAGAGGGTTATTCAAGAAAGCCGAAGAGCTTTCTGTACTTTGCGATGCTGATGTTGCTGTCATCATCTTCTCCTCTAATGATAAGCTCTTTCACTATTCGAGCTCAAGGTATCTAGGGTTATGTGTGTGTTTTTACGTGTGTCAGATTGTGGTTTTATTGATATATGTATGTGGGGTTTCATGATTCTTCTCGTATTTTTCCTTCTTTTTGGGTCGAAGGGTTTATATATCACTAATCCCAGCAATTAGTGTTCTCTATGTAATTGTCTGAATTGTTTATGTGCTTTTGTGTCCTTAATTGGATTAAATTAAACTTTTAATT…				2	F0 S0 S1 S2
	Toff_WURv1_g26592	SS_200000286	join(326558..326742,328050..328128,328651..328715,328803..328902,329108..329149,329267..329308,329396..329553,330190..330208)	XP_023770387.1MADS-box protein JOINTLESS-like isoform X2	MADS	Type II	SVP	AGL22		M_SVP_Tof-g26592	326557	330208	1	t1	t1	3651	8	690			ATGATGGCTAGGGAAAAAATAGAGATTAAAAAGATTGATAATGCTACTGCGAGACAGGTGACCTTCTCCAAAAGGAGGAGAGGGTTGTTCAAGAAAGCTGAAGAGCTCTCTGTACTTTGTGATGCTGACGTGGCTCTCGTCATATTCTCCGCTACTGGTAAACTGTTTCAGTATTCTAGCTCTAGGTAATCTTCGTTAGATCATGTATCTATGTATGTTTGTGTTTCAATATTTTGTTTTTCTTTTTGGGTGCTATGGCATTTCATAAGTAAGGGTTTGCTTTTTCTTACTTAGGGTTTAATTGTGAACTAAAGGGTTGTGTGATTATCAAAAACTATATATATAAAAGGATGATGACCCAACTGTGAAAATGTATATGTAAAAACAAACCCACCATTA…		3		3	F1
	Toff_WURv1_g29211	SS_200000501	join(51216..51232,51474..51535,51707..51899,54187..54268,54368..54429,54523..54622,55149..55190,55624..55665,55760..55938,56131..56146)	XP_023750478.1MADS-box protein AGL24-like isoform X1	MADS	Type II	SVP	AGL22		M_SVP_Tof-g29211	51215	56146	1	t1	t1	4931	10	795			ATGTCAAAAAGTCAAAAGTGATGATTAAAATTTTTATTTTTTAATTAAAGTAGATGTTTTTATATCGGATATTTTTAAAAATATCCCATTTTCTTTTGTCAAATGTGGTAAGCAGTTGAAGTTAAAGTAGATTAGTTTTGCTATTTAAAGGAAGGTTATAGTTTCCTTTTCCTGGAACCCACACACACCCAAACATATCTCCACACACTCACACACCACCCCTTTTCCTTTTCTCTTTCTTCTTTTATTGGCAACGAGACTATTCATCACTGTTATCTCCAAGAATCCACCCCAAATCCATCTTCTTCCTTCCAGAAAAGGTAAAGAAAAACCCACCAAAATCTAGCCCTTTAATTTGCGCAAAACACATGCCCTTATTTTCTGCATGATAATGAAGAT…		3
	Toff_WURv1_g16252	SS_248	join(2443118..2443299,2443409..2443487,2443588..2443649,2443743..2443842,2443950..2443991,2444320..2444361,2444463..2444536,2444645..2444711)	XP_023747202.1truncated transcription factor CAULIFLOWER D-like	MADS	Type II	TM8	TM8		M_TM8_Tof-g16252	2443117	2444711	2	t2	t1	1594	8	648			ATGGGAAGGGGAAAAGTAGAGCTAAAGAGAATAGAGAATCCAACAAACAGGCAAGTCACCTTCTCCAAGAGAAGAGATGGACTCCTCAAGAAAGCCATTGAACTCTCCATTCTCTGTGATGCTGAGGTGGCACTTCTTGTCTTCTCTCCTTCTGGCAAAGCTTATCACTTCTCCAGCCATGAGTACATATACTCTCTCTCTCTCTCTAGATATCTCTCTCTATATGTATATGTTAATATGTATATATATGTATATATTTATGTATGGTGATTAATTGATGGTATGTTGCAGCATGGATAGGACCATCAGGAGGTACAGAAACGAAAAGGGTCTGCATAAAATGAACAGCCATGGAGTTAGAACTATCGAGGTATGTTTAATATATCCCTTTAAATAGAT…		19		11	S1 S2
	Toff_WURv1_g3989	SS_66	complement(join(347676..347771,348412..348589,348674..348810,349182..349232,349323..349422,349675..349736,349830..349857,350189..350250,350761..350779,350865..350918,351044..351228))	XP_023735435.1agamous-like MADS-box protein AGL104	MADS	Type II	MIKC*	AGL104		M*_Tof-g03989	347675	351228	1	t1	t1	3553	11	972			ATGGGTCGCAATAAGCTTCCAATGAAAAGAATCGAGAACAACACAAGCAGATTGGTCACATTTTGCAAACGTAGAAATGGACTCATTAAGAAGGCTTATGAGCTCTCGGTTTTATGTGATATTGACATCGCTCTCATCATGTTTTCTCCCTCAGGCCGCCTTAACCACTTTTCCTGTAAACGAAGGTCTCATCCTAACCCTAACCCTAACCCTAATCTTGTTCTTTATGTTTCTGGACATTGTTTTCAACACAGATATGATGCACCATTTCCAATGTGGTTTTTTTAGCCATTGAAATTTCTTTTTACAGAACAGAAGACGTACTCAATCGATTCGTAAATCTCTCTGACTCTGATAGAGGAAGGTGCTTATATACAATCTATCTCTCTAGATTTCTTT…		32		4	F1 F2
	Toff_WURv1_g43144	s694_122562_237147	join(21388..21572,21655..21733,21820..21884,21970..21985,22086..22147,22234..22330,22428..22475,22575..22702,23070..23439,23577..23612)	XP_023761277.1agamous-like MADS-box protein AGL65 isoform X1	MADS	Type II/I	MIKC*	AGL65		M*_Tof-g43144	21387	23612	2	t1	t1	2225	10	1083		Toff_WURv1_g43144.t2	ATGGGGAGGGTGAAGCTGAAAATCAAGAGATTAGAGAACATTGGCAATCGTCAAGTAACGTTTTCCAAAAGAAGAAACGGAATCTTAAAAAAAGCCAAGGAATTATCTGTGTTATGTGATATCGACATCATCCTTCTTATGTTCTCTCCCACCGGAAAGCCCACATTATTCACCGGACAACGGAGGTCATCTCCTAATCATCCTCTAATCTCTTTCTACAAATTAATCCCAATTAACTAGTCCTTAACCTCATCTCTCTCCTTTCAGTAACATCGATGAGGTTATCGCAAAGTTTGCCAGATTAACACCACAAGAACGAGCAAAACGGAAATTGGAAAGCCTCGAAGTAAGTCAAACTTTTCAATTTACACCCTGCAACTATCTTCATTTAGTAATTTA…		11		4	F1 F2
	Toff_WURv1_g36098	SS_2000004473	join(989522..989706,989833..989886,990051..990066,990221..990288,990380..990413,990521..990582,990796..990895,991178..991228,991331..991458,991538..991662,991753..991829)	XP_024977146.1agamous-like MADS-box protein AGL104 isoform X1	MADS	Type II	MIKC*	AGL67		M*_Tof-g36098	989521	991829	1	t1	t1	2308	11	900			ATGGGGAGAGTAAAACTTCAGATCAAGAAAATAGAAAATACTACAAATAGGCAGGTGACTTTCTCAAAAAGAAGAAATGGATTGATCAAGAAAGCTTATGAACTATCCGTTCTATGTGATGTGGATGTTGCTCTCATCATGTTTTCCCCCTCAGGAAGAGCTAGCATTTTTTCTGGAAGTAGAAGGTAAAAATGATCAGTCTTTAATGCAACATAAACCCCCTTTTGAGCATTTATTTTGTATCATTTTGAAGCTTTATTCTAACCACCCACTGATTATTTTCCTAAAATTTTCATTTGGGCGTTTAATAGTATCGAAGAAATTATGGGACGATATATAAATCTTCCAGAGCATGAAAGAGGAAGGTATGCATTAATTGGTGTCAATGCTTCAATCATT…		33		12	S3 S7
	Toff_WURv1_g29996/g78847**	SS_200000576/SS_200000101236	join(291206..291208,291324..291440,291552..291643,291817..291887,292242..292369,292548..292652,292737..292880)		REF		PP2A			REF_PP2A_Tof-g29996/g78847											see genes below
	Toff_WURv1_g17984/g20880**	SS_286/SS_365	complement(join(181086..181307,181553..181711,181790..181911,182131..182222,182310..182354,183457..183602,183887..183974,184068..184098,184203..184228,184453..185018))/complement(join(276444..276574,276641..276732,276824..276868,276944..277089,277178..277265,277349..277379,277477..277502,277642..278108))		REF		UBC9			REF_UBC_Tof-g17984/g20880											see genes below
	Toff_WURv1_g10321	SS_166	complement(602848..603624)	XP_023736444.1transcription factor TCP7-like	TCP	Class I	PCF	TCP7-Like	To_PCF_CL12	PCF_TCP07L_Tof-g10321	602847	603624	1	t1	t1	777	1	777			ATGTCAACATCGGAAGGGGCTGCTAACGGCGTTCCAAACGCCGGAATTATTGATACCCAGAGGCAACAGCCTCCCGGCAACGGGGTTTTGACAGTGAAAAAGCCTCCGGCTAAGGATCGCCATAGCAAGGTAGATGGTCGTGGCCGCCGAATCCGCATGCCGATCATATGCGCCGCCAGAGTATTCCAGCTTACTCGTGAGCTTGGCCACAAGTCTGATGGTCAGACCATCGAGTGGCTCCTTCGTCAAGCTGAACCCTCAATTATTGCCGCCACCGGTACCGGAACAACACCTGCTAGCTTCTCTACCGTTTCAGTTGCGGTTCGGAATTCGAATAACTCGTCGCTTTCAGCACTTGACCAGAAATCTTCGGCGCAGCATCACCAGCACTTAATCTCT…		11	12	2	F0 S0 S1 S2
	Toff_WURv1_g34652	SS_2000004032	complement(1023720..1024445)	XP_023738189.1transcription factor TCP7	TCP	Class I	PCF	TCP7-Like	To_PCF_CL15	PCF_TCP07L_Tof-g34652	1023719	1024445	1	t1	t1	726	1	726			ATGTCAACATCCGACGCCAAGCAGCCGGCCGGTAACGGTGCTTTAGTGGTCAAGAAGCCGCCGGCGAAGGACCGACACAGCAAGGTTGATGGCCGTGGTCGCCGTATACGTATGCCTATCATCTGCGCCGCTAGGGTTTTCCAGCTCACCCGTGAGCTTGGCCACAAGTCTGATGGTCAGACAATCGAATGGCTGCTCCGGCAAGCGGAACCCTCGATTATCGCCGCTACCGGAACCGGCACAAATCCAGCTAGCTTCTCCGGTGTTTCAGTTGCGCTTCGTAACTCCAATGCCAATTGCTCACTCTCCGCCGCACTGGATCAGAAACCCCCTTCCCAACACCTGTTCTCTCCTACTCCGTTTATACTCGGGAAACGACTCCGGGCGAATGAAGATGGC…		15	15	2	F0 S0 S1 S2
	Toff_WURv1_g37899	SS_20000015799	200275..201855	XP_024980203.1transcription factor TCP8	TCP	Class I	PCF	TCP8-Like	To_PCF_CL11	PCF_TCP08L_Tof-g37899	200274	201855	1	t1	t1	1581	1	1581			ATGGAACGAACAGATTTGCAGAGCAATAATAAACAAAGCACCACTGCTCCCACCTCCAACACTAGTTCTTCTCACCACCACCACCACCATCACCTCTCCCACCACCTCCACCACCAACCCATGGTGGTCCCATTTGATGCTCGATCTGGAACCCCATTCATGGGCTCCATATCCATCCAACCCGGTCCATCTACCACTCCTACTACTACTAGTGGAGCTTCTTCTTCTCTTTCTTCTCCTTCTAACCAACACCCAACAACCTCCTCCGCCACACAGCTCTCTCCGCCGCATCCACACCTCGTCGACGCCTCCCTCGCCATCGCCACTAGATCCGAAGCTCTAACGGATCTTCCGAAAGAAAACCCTCAACCTGTCGCTGCTGTTCCTCCCAAGCGGTCA…		12	11	2	F0 S0 S1 S2
	Toff_WURv1_g6945	SS_108	complement(1765999..1766820)	XP_023764346.1transcription factor TCP9-like	TCP	Class I	PCF	TCP8-Like	To_PCF_CL9	PCF_TCP08L_Tof-g06945	1765998	1766820	1	t1	t1	822	1	822			ATGAACTCACCATCGCCGCCGTACACAACCCATCAACCACCACCGGAAAATGGTGCTTCCATACGTGGGTTTCCTTTGCTTACATTAAAGAAAGAAGCTTTATTGGAAGAAAAGGTATATAATTCGGCTCCGGCTGCGGCTCCGCCGCCGAGGAGGTCATCCACCAAGGACCGCCACACAAAAGTGGAGGGTAGAGGAAGAAGGATCCGAATGCCGGCCACCTGCGCCGCGAGGATATTCCAGCTGACGAGAGAACTTGGGCATAAATCCGACGGCGAAACAATCCAGTGGCTTTTACAGCACGCTGAGCCATCCATTATCGCCGCCACTGGTACAGGTACTATTCCGGCCATCGCTATGTCAGTCAACGGTACTCTCAAAATCCCCACCACCACAACT…		4	9	4	F1 F2
	Toff_WURv1_g12978	SS_187	complement(3339122..3340312)	XP_023738585.1transcription factor TCP14-like	TCP	Class I	PCF	TCP14-Like	To_PCF_CL8	PCF_TCP14L_Tof-g12978	3339121	3340312	1	t1	t1	1191	1	1191			ATGGATGGTGGTGACGACCATTTCAACCATCGCCCGAACTTCCCTTTTCAATTACTTGAAAAGAAAGACGACGAAGCGTGCTCCTCCTCCGCCACCGTCTCAGCTACCACTGGCTACCCTTCTCGCCCCATCGCCACCGACACTAACAACCCGGCACTTCGATCCAACAGTTCAAACCTGCAAATAACCACCGTCGCCACCACGTCTTCAGCCGACGCATCTAAGAAATTGGCGCCCAAGAGAACTTCAACCAAGGACCGCCACACAAAGGTTGATGGACGAGGCCGCCGTATCCGTATGCCAGCGCTATGCGCCGCCAGGGTTTTTCAGCTCACCAGAGAGCTTGGTCATAAGACTGACGGTGAAACCATTGAGTGGCTCCTTCAACAAGCGGAACCC…		3	8	10	F3 F7
	Toff_WURv1_g28293	SS_200000396	complement(join(434228..434781,434840..434952,435970..436013))	XP_023738585.1transcription factor TCP14-like	TCP	Class I	PCF	TCP14-Like		PCF_TCP14L_Tof-g28293	434227	436013	1	t1	t1	1786	3	711			ATGGATTGGGGTGGGGTCATAGGTTCATACTTTGGTGTTTTGTGGTAGGCCTATGTTTGCAGTCAAATCATGGGTCTGGTGTTTGTTTTAGTTCCGATGGTAGACATCAAATACGTCTATGGTCGGCAAACATTAGCATTTTCTCACATGTCCTTTCTTGCGGGTAAATTTGGGATACGAGGGTTCAATTAGTTTGTGTTTTCTTTGCTCCATATGTGTTGTATCAAAAACATTATATAGGTCATCACACATACAAAGGAAAATTACGACTTTCTACACTTCTACGGTGTTGTTCATATTTTTCTCGACAACTTTTCTCTATGAGTTTTGGTTTTAAGTATTAAATATAACTCAGATGAAGAAAATTCAGTTTTCATAGATGATGTGATATTTTTTTGA…
	Toff_WURv1_g37792	SS_20000012100	complement(564050..565264)	XP_023763001.1transcription factor TCP14-like	TCP	Class I	PCF	TCP14-Like	To_PCF_CL8	PCF_TCP14L_Tof-g37792	564049	565264	1	t1	t1	1215	1	1215			ATGGATGGTGGTGATGATCACTTCCACCACCGCCCTAGCTTCCCTTTTAAATTACTTGAAAAGAAAGACGATGAAGCTGCCAGCTGCTCCTCCTCCTCCGTCTCCGCCTCCGCTGCGTACCCTTCTCTCGCCATCTCCGCCGACACTAATCTAAGCCCTGGTACTGTTAGATCCAACGCTTCTAATATGCAGATTATAACCACCGCTACGAATTCCTCCGGCGAGCCCTCAAAGAAACAACCCCCGAAGAGAACTTCGACAAAAGATCGGCATACAAAGGTCGACGGCCGCGGCCGCCGTATCCGTATGCCGGCGTTATGTGCCGCGAGAGTTTTCCAGCTTACACGTGAGCTTGGACACAAGTCTGACGGCGAAACAATTGAGTGGCTCCTGCAACAG…		3	8	3	F1
	Toff_WURv1_g41820	s3706	complement(1068..2204)	XP_023768181.1transcription factor TCP14-like	TCP	Class I	PCF	TCP14-Like		PCF_TCP14L_Tof-g41820	1067	2204	1	t1	t1	1137	1	1137			ATGGTCATGGATGATGATCATTTCCACCGCATGCGTAACTTCCCCTTCCAACTACTCGAAAAGAAAGACGAAGACGTTTGTTCCTCCTCCGCAGCTACTGCAGCATACGCCATCGACAACTCCTCCACCCTCCTAACATCAACCGCCGCCGCCGCCGCATCATCCACAGACCTCTCCAAGAAACAACCCCCGAAGCGAACTTCAACCAAAGACCGACACACAAAAGTCGACGGCCGCGGCCGACGCATCCGTATGCCGGCGCTGTGCGCCGCCAGGGTGTTCCAACTCACTCGGGAACTAGGACACAAATCCGACGGCGAGACCATCGAGTGGCTACTTCAACAAGCGGAACCCGCCGTCATAGCAGCGACAGGCACCGGCACCATTCCGGCGAACTTC…				10	F3 F7
	Toff_WURv1_g35213/g45767*	SS_2000004157/s2713	complement(825642..826610)/complement(16893..17861)	XP_023731371.1transcription factor TCP15-like	TCP	Class I	PCF	TCP15-Like	To_PCF_CL8	PCF_TCP15L_Tof-g35213/g45767	825641/16892	826610/17861	1	t1	t1	969	1	969	Toff_WURv1_g35213/g45767*		see alleles below	r	3	8
	Toff_WURv1_g34756/g41357*	SS_2000004053/s2744	complement(176200..177303)/complement(14556..15653)	XP_023753343.1transcription factor TCP19-like	TCP	Class I	PCF	TCP18-Like	To_PCF_CL9	PCF_TCP18L_Tof-g34756/g41357	14555/176199	15653/177303	1	t1	t1	1098	1	1098	Toff_WURv1_g34756/g41357*		see alleles below	q	4	9	6	F2
	Toff_WURv1_g32216	SS_200000839	complement(310031..310951)	XP_023755568.1transcription factor TCP19-like	TCP	Class I	PCF	TCP19-Like	To_PCF_CL9	PCF_TCP19L_Tof-g32216	310030	310951	1	t1	t1	921	1	921			ATGGCGAATCATGAATCGGAATCGGAATCGGAAGCGGAAGAAGGTACCAACACCACTACAATTTTATCAACGTCTGATCGGTTAATTGGCGATCCAGTGCTGTTGAAGGAAGAGCCGGCGGATAATAATGAGTTGGAGGGGTCGATACCGGTTGCAATGGTGCCGATGTCAACGTCGCAGAAACAAATGACGGTGGCGCCGCCGCGGAGGTGCTCAAAGGATCGCCATACGAAGGTGGAGGGACGCGGTCGGAGAATCCGCATGCCGGCTGCTTGTGCTGCGAGGATCTTTCAGTTAACTCGGGAACTCGGGCATAAATCAGACGGAGAGACGATTCGATGGTTGTTGGAGCACGCAGAGCCGGCTATCGTAAAAGCTACCGGCACCGGGACGGTGCCG…		4	9	6	F2
	Toff_WURv1_g37087	SS_2000008175	complement(381..1361)	XP_023754782.1transcription factor TCP19-like	TCP	Class I	PCF	TCP19-Like	To_PCF_CL9	PCF_TCP19L_Tof-g37087	380	1361	1	t1	t1	981	1	981			ATGGCGTCGATTGAGAAGGCGAATATGGAATCTGAAGAGGAAGCTGTTAGCAACACCGCTAATATTCTATCAAAAACTGATCCCTTGCTCGGAGATCGACCGTCGTATACCATAACGCCAATTCCACAACGTCCGCCACCGCCGCCAGTAGAAGTTACCGAGTTCAAGGAGGAGCCAAAGGAAACTTATTCAAAAGGTTCCACGCTCGTGCCAAAGCAAATGCTGGTGGCGCCATCACGGAGAGTTACTAAGGACCGCCACACGAAGGTGGAGGGCCGTGGAAGGAGAATCCGCATGCCGGCGGTGTGTGCTGCTAGAATCTTCCAGTTAACTCGGGAACTCGGTCACAAGTCAGACGGCGAGACGATTCGGTGGTTGTTGGAGCACGCGGAGCCAGCT…		4	9	1	F0 S0
	Toff_WURv1_g22919	SS_20000080	complement(72136..73047)	XP_021982451.1transcription factor TCP20	TCP	Class I	PCF	TCP20-Like	To_PCF_CL10	PCF_TCP20L_Tof-g22919	72135	73047	1	t1	t1	912	1	912			ATGGATCCCAAGGGTTCAAACCAACAACATCATCAGCAGCCACATGAGGTTTCAAGGATCTTAAGCCTCCCTCACCCGAACACCAACAATATGGGAGATACCAGCATGAACAACAACAAGGCTTCTGAAATCAAAGATTTACAGATTGCGATTCCCGAAAAAGAAAGCACGAAGAAGCAACAACAGTTAGCACCCAAGCGCGCCTCCAACAAGGACAGACACACAAAGGTCGAAGGGCGAGGTCGGAGGATTAGGATGCCCGCTCTGTGTGCTGCGAGAATCTTTCAGCTGACTAGGGAATTAGGTCATAAATCCGATGGGGAAACAATTCAATGGCTCCTACAGCACGCGGAGCCTTCCATTATAGCCGCCACCGGAACCGGAACGATACCTGCTTCA…		6	10	10	F3 F7
	Toff_WURv1_g34873	SS_2000004083	complement(76273..77202)	XP_023740808.1transcription factor TCP20	TCP	Class I	PCF	TCP20-Like	To_PCF_CL10	PCF_TCP20L_Tof-g34873	76272	77202	1	t1	t1	930	1	930			ATGGATCCCAAGGGCTCTCAGCAGCCACACCAAGTTTCAAGTTTTTTGACTCTTCCCCAACCCACCACCACCACCACCATGGCTGATCACACCAACAAGTCTTCTCAAGAACCCAGAGATTTACAAATAGTAATCGCCGAGAAAGACGACGGCGGAACCAAAAAGCAACAAAGTTTATCAGTCAAACGGAGCTCCAACAAAGACCGGCACACCAAAGTTGAAGGTCGTGGTCGTCGGATAAGGATGCCTGCACTTTGTGCGGCGAGGATTTTTCAACTCACCAGAGAATTAGGTCACAAATCCGATGGGGAAACTATTCAGTGGTTGCTACAGCAGGCGGAGCCGTCTATCATTGCCGCCACCGGAACCGGAACAATCCCTGCTTCCGCGATGGGGGCA…		6	10	10	F3 F7
	Toff_WURv1_g8470	SS_139	complement(3442907..3443419)	XP_023749418.1transcription factor PCF1-like	TCP	Class I	PCF		To_PCF_CL13	PCF_TCPLike_Tof-g08470	3442906	3443419	1	t1	t1	513	1	513			ATGGACCCGGTCCCAGATAAAATCTTCATAGAAAGATTTGACCAAACCCCACAACAACCACCGCCGCCGCCGCCTACTTCCTCCACAGACATGCATAAACAACTTGTTCCGTTTCAAATGGGTCCTTCCAATAGTCTGGTTCCAATCCAAACCCCCCAAATCATTCAGTCAAAGAAGAAAAAGGACCGCCATGCGAAGGTGAACGGGAGGGGCCGGAGAGTGAGGGTCCCGGCGCTGTGTGCGGCTCGCATATTCCAGCTCACCCGAGAGCTCGGTCACAGCACCGACGGACAGACAATCGACTGGCTACTTCACCATGTCGACCCATCGTTGTTTCCACCTTCTTCCGCTGCCGGAGGTGCTTCTCAGACGGTGGTTCCCGAGAACCGGGGAGTGGTG…		10	13	2	F0 S0 S1 S2
	Toff_WURv1_g12085/g26404*	SS_186/SS_200000273	13039493..13040836/join(1488586..1489852,1489920..1489993,1492928..1492981)	XP_023732997.1transcription factor TCP2-like	TCP	Class II	CIN	TCP2-Like		CIN_TCP02L_Tof-g12085/g26404	1488585/13039492	1492981/13040836	1	t1	t1	4396	3	1395	Toff_WURv1_g12085/g26404*		see alleles below	o	9		1	F0 S0
	Toff_WURv1_g23422	SS_100000479	complement(join(403357..403982,404085..404589))	XP_023771333.1transcription factor TCP4-like isoform X2	TCP	Class II	CIN	TCP4-Like		CIN_TCP04L_Tof-g23422	403356	404589	1	t1	t1	1233	2	1131			ATGGGAGAAAGTTATCAGTATCACAACCAACAACTCCAGCAGCAGCAGCAGCAGCAGCAGCAAGCAAGTGGGTCGTCGAGATTGGGATTGAGGGGAGCAGGTGGTGGAGGAGGTGGCGAGATTGTGGAAGTTCAGGGCGGCCACATTGTACGATCCACTGGCCGGAAAGACCGACACAGCAAGGTATGCACAGCGAAAGGACCAAGGGACCGCCGTGTTCGTCTCTCAGCTCACACCGCCATCCAATTCTACGACGTGCAAGACCGACTTGGCTACGACCGTCCAAGCAAAGCCGTCGATTGGCTTATTAAAAAAGCCAAGGCCGCTATTGATGAACTCGCGGAACTTCCGGCATGGAAGCCCACTGCCACCACGGCGACGACAACCCCAAATTTGACC…		1
	Toff_WURv1_g33083	SS_1000001363	53259..54383	XP_023768308.1transcription factor TCP4-like	TCP	Class II	CIN	TCP4-Like		CIN_TCP04L_Tof-g33083	53258	54383	1	t1	t1	1125	1	1125			ATGGAAGGAAATTATCAGTACGAACAGCAAGGACTCCACCAGCAGCCGTCGCCAGCAGGTGGATCGTCGAGATTGGGGTCGAGGAACTGCGTTGGTGAAATTGTGGAAGTTCAGGGCGGTCACATTGTACGGGCAACTGGCCGGAAAGATAGACACAGTAAGGTATGCACTGCTAAAGGACCGAGAGACCGCCGTGTCCGTCTCGCGGCCCACACCGCCATCCAGTTCTACGACGTACAAGACCGCCTTGGGTATGACCGTCCGAGCAAAGCCGTCGATTGGCTTATTAAAAAAGCTAAAACTGCCATTGATGAGCTTGCGGAGCTTCCCGCCTGGAATCCAACTTCCACCACCACCGCCACCACAATTTCAACTACAAATTTGAATTTTGAGCAAAGT…		1		10	F3 F7
	Toff_WURv1_g12894	SS_187	complement(join(2132013..2133103,2133566..2133716,2133834..2133836))	XP_023753897.1transcription factor TCP5-like	TCP	Class II	CIN	TCP5-Like		CIN_TCP05L_Tof-g12894	2132012	2133836	1	t1	t1	1824	3	1245			ATGGTAAGATTCTAAGAAATATCATCTTTTCACATAAAGAAAAAAAAAAAAGTATTATGATTTCTTTTATATGTGACTGAGATATAATGCTTTCTTTTGTTGCACATAATTGGAAATCAGGTTCATACACAGCTTGCCAAAGAACTTGCACACGGATTCATTAACAAGTGCATTTTAGAGACTGGAGCTTTTCCTCTTTCTTTACAGGAAACTTTACCATTGAATGCTCCCCGATCTGCAGTACCAAAGGCACATGATAGTTATAATCGATGTGAGTTCATTTTTATGATCTATACCTTTCCATAAAAGTACTATCATGTACAAATTGAAATTTGCAGGTTCAAATTATTCTTCAGATGTAAATAATCTCAAACTGTACTTGTTTGTTCTTGTTCCTCT…		2		10	F3 F7
	Toff_WURv1_g42808	s2_411747_582110	complement(29059..29715)	XP_023743898.1transcription factor PCF6-like	TCP	Class II	CIN	TCP6-Like		CIN_TCP06L_Tof-g42808	29058	29715	1	t1	t1	657	1	657			ATGAGGAAAAGTAAAGGAATCGGAGAGATAGTTGAAGTGGAAGGAGGTGGTCGACTCGTTAGGTCATTGAGAAGAAAAGATCGGCATAGCAAAGTCTGCACATCGAAGGGTCCGAGAGATCGGCGTCTTCGTTTATCAGCTAATACGGCGATACAGTTTTATGATGTTCAAGATAGGCTTGGGTATGATCGACCCAGTAAAGCCATTGATTGGTTGATGAAGGAAGCGAAACCTGTCATTGACGCACTTAAAAATGATAACCACCATCAGGATACATCTGAGGCATTTCATCGAGCAGGTGGTGAGCGGAACCAGGAGATTTCCATTCACCCGAAGATCGGCGGTTTCGGAGACTACCCGATGGGGTTGATTGATTTAAGAGGTAAAAGGCAGGAGAAT…		1		1	F0 S0
	Toff_WURv1_g19601	SS_345	complement(join(805185..805203,805296..805321,805398..805895))	XP_023771178.1transcription factor TCP10-like	TCP	Class II	CIN	TCP10-Like		CIN_TCP10L_Tof-g19601	805184	805895	1	t1	t1	711	3	543			ATGATATTGCCTCTAAAGATGAGAAAGAATGGAGCCAAAGGAGTGACTGTTGAAGGTCGACTTGTTCGGCCAATTCATCGAAAAGACAAGAACAGCAAGATTTGTACATCGAAGGGGGCAAGGGACAGGCGTATTCGATTATCAGCCAACACTGCTATTCAGTTCTATGATGTGCAAGACCGGCTAGGATATGATAGGCCTAGTAATGCTATTGATTGGCTCATGAAAGAAGCAAAAATTGCCATTGATGTGCTGAATGCCGAACACTACCATCCTTCAGAGACATTGCATCGCACACCCGGTGATCGGAATCAGCTGAATTTGAATCACAATATATCAAATGGTTCCAACAACTACCCATTTGAGGCCATCAATCAAAAATTACACGAAGATATTAAC…		16		2	F0 S0 S1 S2
	Toff_WURv1_g10404/g32550*	SS_170/SS_200000893	join(739072..739630,739691..740071,740152..740168)/join(696012..696570,696631..697011,697092..697108)	XP_023756208.1transcription factor TCP13-like isoform X1	TCP	Class II	CIN	TCP13-Like		CIN_TCP13L_Tof-g10404/g32550	739071/696011	740168/697108	1	t1	t1	1097	3	957	Toff_WURv1_g10404/g32550*	Toff_WURv1_g32550.t1	see alleles below	n	2
	Toff_WURv1_g37194	SS_2000008303	complement(388883..389824)	XP_023770796.1transcription factor TCP17-like	TCP	Class II	CIN	TCP17-Like		CIN_TCP17L_Tof-g37194	388882	389824	1	t1	t1	942	1	942			ATGAATATCTCGAATTCACGAGAATCCGATGAAGAAAAAAACACAAACAACGGCAAGAAGATCACCCCAAACCCTAATTTAGCAACATCTTCGTGGACAAAGCTTCGAGATCCAAGAATCGTTCGAGTTTCACGAGCTTTTGGTGGGAAAGACCGGCATAGTAAAGTTTGTACAGTGAGAGGATTAAGAGATAGGCGAGTGCGGTTATCTGTTCAGACGGCTATTCAGTTATATGATCTTCAAGAACGCTTAGGTCTTAATCAACCTAGCAAGGTTGTTGATTGGTTGCTTGATGTCGCTAAGCATGAAATCAACGAACTTCCACCTCTTCAAATCCCATCTGGGAATTTCGGTCAAAATCTTCAATCGATGATCAATCTTGCTTCTTCTCAATCCGAA…		2		6	F2
	Toff_WURv1_g25570	SS_200000216	join(208213..208471,213276..213356,213557..214434)	PWA77131.1Transcription factor	TCP	Class II	CIN			CIN_TCPLike_Tof-g25570	208212	214434	1	t1	t1	6222	3	1218			ATGTTCCACCATCGCCTCACCTCAGTCCTCACGTCAAACGCACGAAGCAAGTCACGGCTCACCTTAGTCCTCACGCAACCACCGAATCAGCCAATCAGGCATTCACGCAACCAGTTCCACCATCGCCTGATCCTCCATCGCATCATTGCTGCATCTCGCAATATCATTCATTGCTGCATCTCGCAATCTCATTCCTCCATTCTTCCAAGTTCCATCGATGATCAAAACTCAGAATTGGTTGTCGCCTGTCGCTTAATCAGTGAGTTTTTGGCATCATAAATTGCAATTTGTTAGTTCATTATCAGTTTGTTAGTTCCTTATCAGATTCTTATCAGATTGCAATCAGTGAGTTAATCCTTAGATGCTTAATCAGTGAGTTTTTGGCATCAGAATTCTGAA…		2		6	F2
	Toff_WURv1_g44836	s1752	complement(join(27404..28281,28485..28565,28910..28925))	PWA77131.1Transcription factor	TCP	Class II	CIN			CIN_TCPLike_Tof-g44836	27403	28925	1	t1	t1	1522	3	975			ATGGCCGCAGTACATGGTCCCCAGCTGAGACTCCCCATCCATCCATATCATTAATTAACGTAATTATACATCACTCACACGTACCTAAAAAGAATGACCTATATATATATATATATATATATATATATATATATATATATATATATATATATATATATATATATATAACCAATTTCATCAATCAAAGATTGTTCAGTTTGTGGTGTATACTTATCTTCATCGCTTTGTCGGTGTGACATTGACACCACTGGTACCAAAAAAATTCAATCTTTAATTCATCATTCTTTAATATAACCCAACATTCATAACATTCTTGAATTCCTTAGTTTACTCAAGGTGCGATTAATTAATCTTCTGTAGCTCATATACAGGAATTAAAGATCAAACTAATTGTGTTCT…		2		6	F2
	Toff_WURv1_g12302	SS_186	complement(15674299..15675495)	XP_023748252.1transcription factor TCP12-like	TCP	Class II	CYC/TB1	TCP12-Like		CYC_TCP12L_Tof-g12302	15674298	15675495	1	t1	t1	1197	1	1197			ATGGATTACGAATTTCCTACGAGCAACAACGAAACCGTCATGGTCTATTCAAACAAGGAACCAAATAGTGAAAATCTTGACTCAAATCACGAACAAGAGGCAGCGATGTTTGGGAATTTTCCGTTGCCTTTCCATGATGAGATATCTTCTAACACAAAACCGCAAAACCACCATGGACATCGGCTTAGCACCGATAGATCAAAAACACCAAGAAGCAGCACGGCAAACGATCCAGCTGATCAACCTCCGCCATCGCTGGCCACTAAAACAGTACGTGTACGAAAGAAAAGAAGCGCCGGGAAGAAAGACCGACATAGCAAGATTCACACAGCTCAAGGCCTCAGAGACCGACGAATGCGTTTGTCTCTCCATATTGCTCGCAAGTTTTTTGGTCTTCAA…		7		2	F0 S0 S1 S2
	Toff_WURv1_g2202	SS_14	join(33374..34465,34639..34698)	XP_023767137.1transcription factor TCP18-like	TCP	Class II	CYC/TB1	TCP18-Like		CYC_TCP18L_Tof-g02202	33373	34698	1	t1	t1	1325	2	1152			ATGCATCCCTCTTCCAACAACAATGGCTGTAAACCACCAAAGACTTCTCTTTTTGGTAATTACTACAACGATACGAACCATTCAAGAACCCCTCAAGAACATTATTATCCTCCATCTTCTTTTTCCTCCTTCCTCCTTCCATCCCCTAATTACATTCCTTTAGAAGATGAAGCTCTCTTCTGCGAGTCCTTCCAACAGCAACAGTATTTCGCCAATGATCATACCCACCTCGATGCAATCATTCTCACTCATGCGAATGTGGAATCTATCAAGGGAGAGTGTGGTAGCAACAATGGCGTACAGGTAGCTAGGAATAACATCAATGATGGAGACGATGAACACTACGAGTTTATAAGTACTCACGGTGAGCCTGAAAGTAGCACTCCAAGGAAACGACAT…		5
	Toff_WURv1_g2203/g28306*	SS_14/SS_200000396	join(578425..579423,579518..579574)/55686..56477	XP_023767137.1transcription factor TCP18-like	TCP	Class II	CYC/TB1	TCP18-Like		CYC_TCP18L_Tof-g02203/g28306	578424/55685	579574/56477	1	t1	t1	1150	2	1056	Toff_WURv1_g2203/g28306*		see alleles below	p			2	F0 S0 S1 S2
	Toff_WURv1_g12841	SS_187	join(982855..983643,983775..983831)	XP_023747679.1transcription factor TCP18-like isoform X1	TCP	Class II	CYC/TB1	TCP18-Like		CYC_TCP18L_Tof-g12841	982854	983831	1	t1	t1	977	2	846			ATGGAGAAATCAAGCTACAATAACAGAAAATATGCTACAGTTGCTAGCGCCGATCACTTTAACAATCATGCGATTCTTCAAAATAACTCTACAATGAGAAAGATCGGAGCTTCCAAGAAAGACCGCCACAGCAAAATAAACACAGCCCAAGGCCCTAGGGACCGCCGGATGAGACTATCTCTTGATGTCGCAAAGAAGTTCTTCAAGTTGCAAGACATGCTAGGGTTCGATAGGGCCAGCAATACAATCGAGTGGCTGCTCACGAAATCAAAACCCGCAATCCAAGATCTACTTTCCCTGCAACTGAACCGTACTTGCAGTCTCCTTGGTCTTTCAGACACTTCATCTTCTTCATCAGAATGTGAAGTTATGTCTGGAATTGATAGTCAACCGATAGTA…		5
	Toff_WURv1_g28305	SS_200000396	join(546007..547101,547307..547366)	XP_023767137.1transcription factor TCP18-like	TCP	Class II	CYC/TB1	TCP18-Like		CYC_TCP18L_Tof-g28305	546006	547366	1	N/A	t1	1360	2	1155			see alleles below		5
	Toff_WURv1_g24074	SS_200000137	complement(join(15649..15740,15799..15957,16144..16714))	XP_023747491.1protein JINGUBANG-like	TCP	Class II	CYC/TB1			CYC_TCPLike_Tof-g24074	15648	16714	1	t1	t1	1066	3	822			ATGACTGCGTTTTTGCAGAACAACAATCTTCCCCGACGACAGAAACTCGCCATTTTCCTCCACAACTCAGAACCAGATCTTTTCTTCACCACCCAACAACCACCGAAAAACACCGAAAACAATTGCAGTCACCGCCGTAGCAACGCCTCAGTTCCTAGCCCTGTTTCGTCTACAAATTCATCCCCAGTCCACTTCATGTCTCCAATAAACCATATGCCGTCGCCTTACTCCAAATCTCCATGGATTCTTCCTCACAACGACGGCAGCATTCAGAACAATTGCTTGATCGGGACTTTGATACGTGAAGAGGGTCATATTTATTCGTTGGCTTCGTCTGGTTATTTGCTGTTCACTGGTTCGGACTCCAAGAACATTAGAGTGTGGAAATATTTGATGGAG…
	Toff_WURv1_g37866	SS_20000015766	292200..293087	KVI03076.1Zinc finger	TCP	Class II/I	PCF/CYC/TB1			CYC_TCPLike_Tof-g37866	292199	293087	1	t1	t1	888	1	888			ATGCCAAACACATTCACGGAGGCGGTCATTTGGTATTGTGAAACCTGCAAACCAGCGGTTCAAAATGAGGTTAAATCTTCACCATCCCATAAAACCATCGATCCGATATGGAGTGACACATCATCATCAGACTCCGATTCAAGTTCCAGTAGTTGTTCCAATTGGAAGGAATTTGACGAATGGCAAGCACGAATTTCCCAACAAATTCTCCACTTCAACGCCGCAAGGATATCCTTCGCACCCTTCAATCACCGATCGCTACCTGAAAACCTAAAGGGCATGGAAACAAATAGTTGGGTTCCGAAGGGGGGCGTCGTATGTGAGACGTGCGGTGATAAAGGATTCACCAATGCTTTTGTTTACTGTGTTAAGTGCTTGGAATATGTCATTCACAGGTAC…
	Toff_WURv1_g36520	SS_2000004994	join(261545..261685,261770..262111,262460..262735,262995..263000)	AXM05000.1cycloidea-like protein	TCP	Class II	CYC/TB1			CYC_Tof-TCPLike_g36520	261544	263000	1	t1	t1	1456	4	765			ATGTTTTCCTCAAACCCTTCTCAAGAAATTCCCTACTCTTCCGTTCATGTCTCCCCTCCTTTCAGCTCCTTCTTTGACCACGACATAAATGGCGATTATTTTATTCACCAAGAACACGGGAGTACTAATAACCCAGTTAATGTGTCTGCCGATTGTTTTTTAAATTCATACGAAAGTACTCCATATCCACCACCTCCCTCAAATTCGCAAGATTTGATTTGTCAGGATCAACAGATTAATCGTGAAGGGTGTTTGTTGCAGTACGGTGATGATTACGATGATCTTTTGGAGTCGATAGTTTATCCCTGTAAGAAGAAACCGGTGAACAGTAAGAAAGACGGGCATAGTAAAATCTACACGGCGCAAGGTCCGAGAGATCGGAGGGTGCGATTGTCCATT…				3	F1
	Toff_WURv1_g3253	SS_53	join(3791200..3791234,3791509..3791583,3791670..3791761,3794179..3794317,3794655..3794750,3794826..3795070,3797590..3797647,3798367..3798484)	XP_016438555.1 floral homeotic protein APETALA 2-like	TF		AP2			AP2_Tof-g03253	3791199	3798484	1	t1	t1	7285	8	858			ATGTTGAATCACCAATTTAAGAGACCTACTTTGAGGTGTGTATCACTATTTACAGTTCTTTTGCCATCAATCACGTGTTCTACTTGTTCAGCCATAACTTATGCATTTTCTGATTTGTTATATTGGTGAGAGTTGAAGCTGCACATGTGTTGATTTTTTTTTCATAATTTGTGGGTGGTAAATGGTGATTGTTCCTAATCAGTTTACTTCCTTTAGACTAATTTTAATTGTTTTTATATTTACTATTGTTTGTTTTTTAATTGTAACTAAAAGGTTTATTGACATTTAATCCATGTTTTCATGAGTCAGTGATTGTGGGAAGAAACATGTGTATATTGGTATGCTGTATATGGATCTTTTTGACACTAAAGTTGAAGCTGCTTGGTAAATGTGTGTTTT…				6	F2
	Toff_WURv1_g17984	SS_286	complement(join(181086..181307,181553..181711,181790..181911,182131..182222,182310..182354,183457..183602,183887..183974,184068..184098,184203..184228,184453..185018))	XP_023731385.1floral homeotic protein APETALA 2 isoform X2	TF		AP2			AP2_Tof-g17984	181085	185018	2	t2	t1	3933	10	1497			ATGTGGGATCTAAACGGGTCACCCGATCTGAGAAAGGATCACGAAGAATCAAACGGTTGTTCGACGCCGGTGGAAGCAGACGACGACGATAATAGTAAAGGTAAAGCGGTTGGATCCGTGTCAAATTCGAGCTCTTCCGTGGTGGTTATGGAGGAAGACGACGGCTCCGACGATGATGATTCCGAGAAAGGAGGGAGTTCAAGAAAACGAAGCAGTAGGTTGTTTGGCTTCTCCATCGACGGAGACGGCGATCCACCGGTAACCCATCAGTTTTTCCCCGTTGATGGTTCTGAAATGGGCCCCACAACCTCTCTTGCTGTTGGTATGCCGTCGGTAACTTCTTTCCCGGCGGCTCACTGGGTCGGTGTTCAATTTTGTCACCAGTCACCGGTGCCTGTT…				10	F3 F7
	Toff_WURv1_g20880	SS_365	complement(join(276444..276574,276641..276732,276824..276868,276944..277089,277178..277265,277349..277379,277477..277502,277642..278108))	XP_023744961.1floral homeotic protein APETALA 2-like	TF		AP2			AP2_Tof-g20880	276443	278108	1	t1	t1	1665	8	1026			ATGATGTTAGACCTCAATCTGAATCTTCACCAGAGCGATTTGAGGCCGAATTATGTGACTGACGACGGAGGTAAGTTGGAATACTCTGATGATGTCACCTGGAATTCATCCGCCGTTAATGTGGAGACAGCTAGCAACGCCGGAGACGACGAGAACGCTGACGCTTGCTCGAATCTCGAGTATGCCTTTGACATACTTAAACGAAATAATCTAGAAGACGATAAGAGCGCAACGAAGCAGCTCTTCCCTGAGGTTGGTGGAGATAGCGGTGTTAGGTACAGTAACTGGCTGGATTTTGATGGTGGCAGTGCGGTGGATGGAAGAGAATTTATCGTAAGGCAACAAAGCTATCAGCAGCAGGATAGCCAGCAGATGAAGAAAGGTAGGAGAGGACCTAGA…				4	F1 F2
	Toff_WURv1_g21085	SS_378	join(511859..512442,512845..512870,512951..512981,513067..513154,513236..513381,513495..513539,513626..513720,513797..513882,513965..514021,514094..514378)	XP_023740230.1floral homeotic protein APETALA 2-like isoform X1	TF		AP2			AP2_Tof-g21085	511858	514378	1	t1	t1	2520	10	1443			ATGCGTGAAGGATTGATGAAGATGTTTGATCTTAATGTTGATGTTCTGCTCTCTGTTCCTGATACAAATAATAAACGCGATCGAAATGTTAGTGCGACTAATGGCTATATCACTGTTAGAACGAACGAACAAGAAGATCGTCAATCGGGAATTCATTCCGGTACCTCAGTTTCCTCTGACGTACTCAACGTCACCGTTGACGATGACGACTCAGTATCATATGGTGCCCTTGATAAGCAGTCTTCTCGTATTGACATCTTAAGTCAAATTGGGGAATCGAAGGAAAATTCAAATCGAGCATCTGTCGGCTTGACTACGCGGCAGTTTTTTCCTGTTGCGAGTTATTTGGAGCTGGAGGAGGAGTTAGGTTCCCGATTAATAACATCCCGGTCGACGATA…				1	F0 S0
	Toff_WURv1_g27799	SS_200000363	complement(join(50615..50800,50874..50930,51021..51106,51183..51277,51364..51408,51522..51667,51749..51836,51923..51953,52034..52059,52462..53045))	XP_023740230.1floral homeotic protein APETALA 2-like isoform X1	TF		AP2			AP2_Tof-g27799	50614	53045	1	t1	t1	2431	10	1344			ATGCGTGAAGGATTGATGAAGATGTTTGATCTTAATGTTGATGTTCTGCTCTCTGTTCCTGATACAAATAATAAACGCGATCGGAATGTTAGTGCGACTAATGGCTATATCACTGTTAGAACGAACGAACAAGAAGATCGTCAATCGGGAATTCATTCCGGTACCTCAGTTTCCTCTGACGTACTCAACGTCACCGTTGACGATGACGACTCAGTATCATATGGTGCCCTTGATAAGCAGTCTTCTCGTATTGACATCTTAAGTCAAATTGGGGAATCGAAGGAAAATTCAAATCGAGCATCTGTCGGCTTGACTACGCGGCAGTTTTTTCCTGTTGCGAGTTATTTGGAGCTGGAGGAGGAGTTAGGTTCCCGATTAATAACATATCGGTCGACGATA…				1	F0 S0
	Toff_WURv1_g36682	SS_2000007940	complement(join(261315..261437,261548..261763,261867..262033,262145..262236,262326..262370,262660..262805,263061..263148,263254..263284,263385..263410,263602..264206))	XP_023754311.1floral homeotic protein APETALA 2-like	TF		AP2			AP2_Tof-g36682	261314	264206	1	t1	t1	2892	10	1539			ATGTGGGATCTAAACGGGTCACCCGATCGGAGGAGGAGAGACGAAGAGGAAGCTGAGGGGTTTTCTTCGGTGCCGGTGGAAGGGGAGGAGGAATATAATAATCCGAAGGGTAAAAGGATTGGAGGATCCGTGTCCAATTCCAGCTCATCGATCATAGTTATTGATCAGGACGACGGTTCTGACGGTGACGAGGATTCCGACGAGGGTGGTTTAAGGAAACTCACAACCACCGGCGATAGCAGGTTGTTTGGGTTTTCAATGACCGACAACTTATCATGGGACTACAATCCGCCGGTGACTCATCAGTTCTTCCCCCTGGAGGATTCTGAAGTAGGGTCCACCACCACCTTCGTCGGAGTAGGTAGAGAAACGACATCGCTACCCACAACTTTCCCGACA…				2	F0 S0 S1 S2
	Toff_WURv1_g37523	SS_20000011830	complement(join(1337353..1337409,1337827..1338030,1338108..1338182,1338278..1338420,1338509..1338612,1338695..1338973,1339059..1339089,1339221..1339246,1339474..1339970))	XP_023767853.1floral homeotic protein APETALA 2-like	TF		AP2			AP2_Tof-g37523	1337352	1339970	2	t2	t1	2618	9	1416			ATGTTGGACCTTAATCTGAGTGTTGATCAGAGCGGTTTGATGTCAAAATATGCAGAGGACGATAGCGGTAAGCAGCTTCTCGAGGTATGCGGCAGCGGCGGTCAGTTGGAACACTCCGGCGGTACCTCGAATTCCTCCGTCGTCAATGTAGAGATATCGAGTAACGCTGGCGATGAGGAGCACTCGTACTCATGTCCAGATTTCGCTTATAGCTTCGATATATTGAAACCTGGTCACCGAGAAGATAATCAGAATTTTAGGTCAGGGAGTGTGGTAACAAAACAGTTCTTCCCGGAGACTGATGGAGACGAAGGCCTGCAGCAGCATCAGTTGTTGGAGGCTGTTAATGGAAGCGCTGTAGACGAAAGAGATTTCATGTTAAGGCAACAACACAAGCAG…				8	F2 F3 F7
	*Alleles are merged into one gene (indicated with a double number in Column B)
	Toff_WURv1_g11476	SS_186	complement(4436750..4437349)	XP_024965069.1agamous-like MADS-box protein AGL29	MADS	Type I/II	Mα	AGL29		Mα_AGL29_Tof-g11476	4436749	4437349	1	t1	t1	600	1	600	Toff_WURv1_g11476/g37222*	Toff_WURv1_g37222.t1	ATGTCAGGATTACCAAAAACAGGTGGTCGCAAGAAAATACAAATGAAAAAGATTGAAAGTGGAAGGGAGCGTGCAGTTACCCTGACAAAGAGACAGAATGGCTTATTCAAGAAGGCGCATGAGCTCGCCACATTATGTGGCGTACAAATTGCAGTTATTTGCTTCTCCTTAAGTGGAAAGCCTTTGTCTTTTGGAAGCCCAAATGTGCCTTTCATCATTAACAAATTTCTAAACACAAATCAAGTTGAACAACAACCGAATGATTCAATCACAAGGTTTATCAATTCTTACCATGAATCCGAACTGCAGGTACTCAACCGAAAACTTGATGAACTAAAGGAGGAACTGGCAAAGGAGACAAAAAAAGGACAAATACTGCAAGAACGTTTAAGGGATTCA…	a_1	23
	Toff_WURv1_g37222	SS_2000008310	complement(92993..93592)	XP_024965069.1agamous-like MADS-box protein AGL29	MADS	Type I/II	Mα	AGL29		Mα_AGL29_Tof-g37222	92992	93592	1	t1	t1	600	1	600	Toff_WURv1_g11476/g37222*	Toff_WURv1_g11476.t1	ATGTCAGGATTACCAAAAACAGGTGGTCGCAAGAAAATACAAATGAAAAAGATTGAAAGTGGAAGGGAGCGTGCAGTTACCCTGACAAAGAGACACAATGGCTTATTCAAGAAGGCGCATGAGCTCGCCACATTATGTGGCGTACAAATTGCAGTCATTTGCTTCTCCTTAAGTGGAAAGCCTTTGTCTTTTGGAAGCCCAAATGTGCCTTTCATCATTAACAAATTTCTAAACACAAATCAAGTTGAACAACAACCGAATGATTCAATCACAAGGTTTATCAATTCTTACCATGAATCCGAATTGCAGGTACTCAACCGAAAACTTGATGAACTAAAGGAGGAACTGGCAAAGGAGACAAAAAAAGGACAAATACTGCAAGAACGTTTAAGGGATTCA…	a_2
	Toff_WURv1_g14087	SS_193	join(169939..170120,174632..174710,184294..184355,184496..184595,184712..184753,184827..184910,186307..186425,186513..186516)	XP_023764793.1MADS-box transcription factor 23-like	MADS	Type II	AGL17	AGL21		M_AGL17_Tof-g14087	169938	186516	3	t2	t1	16578	8	672	Toff_WURv1_g14087/g30672*		ATGGGGAGAGGGAAGATTGTAATTCGAAGGATCGATAACTCAACCAGCAGGCAAGTTACTTTCTCTAAGAGAAGAAATGGGTTGTTGAAGAAGGCGAAGGAGTTGGCTATCTTGTGCGATGCTGAAGTCGGACTCATTGTCTTCTCTAGCACTGGGAAGCTCCACGAGTTCGCTAGCTCAAGGTTTGGTCAACTTTCTTTTACATATATCTTTCTCTTGTTTAATTTACATATATATGTACTTATCACTTGACCTTCATACCTGCGAAAATGTTAGTTTGTCATATATACTGCACAATAAATGAAAACTAGGGCTTCTATACCAATTAATTATACGGTCTTTAGAGGGTAGAGGATCGATGTCATTGACTTTTAGTTTTTGTTTTTGATTTTGATTTTT…	b_1	13		4	F1 F2
	Toff_WURv1_g30672	SS_200000655	complement(join(102512..102539,102620..102738,104115..104198,104272..104313,104430..104529,104669..104730,108184..108262,112319..112500))	XP_023764793.1MADS-box transcription factor 23-like	MADS	Type II	AGL17	AGL21		M_AGL17_Tof-g30672	102511	112500	1	t1	t1	9989	8	696	Toff_WURv1_g14087/g30672*		ATGGGGAGAGGGAAGATTGTAATTCGAAGGATCGATAACTCAACCAGCAGGCAAGTTACTTTTTCTAAAAGAAGAAATGGGTTGTTGAAGAAGGCGAAGGAGTTGGCTATCTTGTGCGATGCTGAAGTCGGACTCGTTGTCTTCTCTAGCACTGGGAAGCTCCACGAGTTCGCTAGCTCAAGGTTTGGTCAACTTTCTTTTACATATATCTTTCTCTTGTTTAATTTACATATATATGTACTTATCACTTGACCTTCATATATACCTGCGAAAATGTTAGTTTGTCATACTGCACAATAAATGAAAACTAGGGCTTCTATACCAATTAATTATACGGTCTTTAGAGGGTAGAGGATCGATGTCATTGACTTTTAGTTTTTGTTTTTGATTTTGATTTTT…	b_2			4	F1 F2
	Toff_WURv1_g39646	SS_200000101520	join(62041..62225,63806..63884,64121..64182,64283..64382,64497..64538,64657..64698,64794..64930,65024..65126)	XP_023762114.1MADS-box protein EJ2-like	MADS	Type II	SEP	AGL4		E2_SEP2_Tof-g39646	62040	65126	1	t1	t1	3086	8	750	Toff_WURv1_g15439/g39646*	Toff_WURv1_g15439.t1	ATGGGAAGAGGGAGAGTAGAACTGAAGAGAATAGAGAACAAAATTAACCGGCAGGTTACTTTTGCTAAGAGAAGAAATGGACTTCTCAAGAAAGCCTATGAACTCTCAGTTCTCTGTGATGCTGAGGTTGCTCTCATCATCTTCTCCAATCGCGGCAAGCTTTATGAATTCTGTAGCAGCTCTAGGTATATACATATATGTATATATATCTATATCTATATGTATACTTTTTCTTTCTCTATCTTGATTTCATGAAAGTTCTTCATCTTGTGTGTGTGTATGTGTGTTTTTGTTAGTTTTCTTAAATTCTATTGTACTTCACACACAAAATCTATGAAATCTTTTTGTTTGTAGTAGATTTACATACGATCTACCTCTTTCTTGTTTTAAAATCTTGGA…	c_1			10	F3 F7
	Toff_WURv1_g15439	SS_219	join(611123..611307,612870..612948,613187..613248,613349..613448,613563..613604,613721..613762,613856..613992,614090..614192)	XP_023762114.1MADS-box protein EJ2-like	MADS	Type II	SEP	AGL4		E2_SEP2_Tof-g15439	611122	614192	1	t1	t1	3070	8	750	Toff_WURv1_g15439/g39646*	Toff_WURv1_g39646.t1	ATGGGAAGAGGGAGAGTAGAACTGAAGAGAATAGAGAACAAAATTAACCGGCAGGTTACTTTTGCTAAGAGAAGAAATGGACTGCTCAAGAAAGCCTATGAACTCTCAGTTCTCTGTGATGCTGAGGTTGCTCTCATCATCTTCTCCAATCGCGGCAAGCTTTATGAATTCTGTAGCAGCTCTAGGTATATACATATATATATCTATATCTATATGTATACTTTTTCTTTCTCTATCTTGATTTCATGAAAATTCTTCATCTTGTGTGTGTGTGTGTGTGTTTTTGTTAGTTTTCTTAAATTCTATTGTACTTCACACACAAAATCTATGAAATCTTTTTGTTTGTAGTAGATTTACATACGATCTACCTCTTTCTTGTTTTAAAATCTTGGAAAAAAG…	c_2	1		10	F3 F7
	Toff_WURv1_g15985	SS_243	join(65192..65373,68599..68680,77996..78057,78155..78254,78592..78633,86264..86305,86473..86565)	XP_024962343.1agamous-like MADS-box protein AGL12	MADS	Type II	AGL12	AGL12		M_AGL12_Tof-g15985	65191	86565	1	t1	t1	21374	7	603	Toff_WURv1_g15985/g72653*		ATGGCAAGAGGTAAGGTGCAGATGAGGAGGATCGAGAACCCAGTGCATAGGCAGGTGACCTTCTGTAAGCGCCGGTCTGGTCTTCTGAAGAAGGCCAAAGAGCTTTCTATTTTGTGTGATGCTGAAGTTGGTCTCATCATTTTCTCAAGCCATGGCAAGCTCTATGAGCTTGCCACCAACGGGTATGCACACCATCTCATCTCCTTGTAGCCTTTAACTACATAAAACTACACAACATACTCCCTATTGATAGATAAGTTGTGTTTTATTGTCATGTAAACAAACCGTACTACAGTCGTAATGGCATCAACCAAATAACAACTCAAAAGAAGAACCCATTCCATGATGGCATAATGGTAGAGTTGTGTGACTTCTACGTAGAAAGTAATCTTAATATAA…	d_1			2	F0 S0 S1 S2
	Toff_WURv1_g72653	SS_200000794	261176..261385	XP_021983520.1agamous-like MADS-box protein AGL12 isoform X1	MADS	Type II/I	AGL12	AGL12		M_AGL12_Tof-g72653	261175	261385	1	t1	t1	210	1	210	Toff_WURv1_g15985/g72653*	partial	ATGGCAAGAGGTAAGGTGCAGATGAGGAGGATCGAGAACCCAGTGCATAGGCAGGTGACCTTCTGTAAGCGCCGGTCTGGTCTTCTGAAGAAGGCCAAAGAGCTTTCTATTTTGTGTGATGCTGAAGTTGGTCTCATCATTTTCTCAAGCCATGGCAAGCTCTATGAGCTTGCCACCAACGGGTATGCACACCATCTCATCTCCTTGTAG	d_2
	Toff_WURv1_g17003	SS_265	join(579305..579486,581363..581444,582010..582071,587037..587136,587280..587321,587416..587457,587562..587722,587802..587805)	XP_024963778.1agamous-like MADS-box protein AGL11	MADS	Type II	AG	AGL11/STK		D3_AGL11_Tof-g17003	579304	587805	2	t1	t1	8501	8	681	Toff_WURv1_g17003/g64139*		ATGGGGAGAGGAAAGATTGAGATAAAGAGGATCGAAAACAACACAAATCGACAGGTCACCTTCTGCAAGAGGAGGAATGGGCTTCTAAAAAAGGCTTATGAGCTTTCAGTTCTTTGTGACGCCGAAATTACCCTAATTGTCTTCTCTAGCAGAGGAAGAGTCTACGAGTACGCCAATAACAAGTAAATATTTTTCAACGTCGTTAACATTTAATCCCTGACCCTTTTATATTACGCTCACCAAGCATACAATCATTTTCCTTCAAAAATAATGGTGCATGTGTCTGGTATTATAGAATGTTAATTTCCGTATAGTTTTAAGCACAAAATTTTTCATGGCTGTGTTTTTTTTATCTATTTGGAACGGTATGCAAGTATTTCATTTTCATATTTACACATA…	e_1	143	5	11	S1 S2
	Toff_WURv1_g64139	SS_370	complement(join(225..285,739..920))	PWA39740.1Transcription factor	MADS	Type II/I	AG	AGL11/STK		D3_AGL11_Tof-g64139	224	920	1	t1	t1	696	2	243	Toff_WURv1_g17003/g64139*	partial	ATGGGGAGAGGAAAGATTGAGATAAAGAGGATCGAAAACAACACAAATCGACAGGTCACCTTCTGCAAGAGGAGGAATGGGCTTCTAAAAAAGGCTTATGAGCTTTCAGTTCTTTGTGACGCCGAAATTACCCTAATTGTCTTCTCTAGCAGAGGAAGAGTCTACGAGTACGCCAATAACAAGTAAATATTTTTCAACGTCGTTAACATTTAATCCCTGACCCTTTTATATTACGCTCACCAAGCATACAATCATTTTCCTTCAAAAATAATGGTGCATGTGTCTGGTATTATAGAATGTTAATTTCCGTATAGTTTTAAGCACAAAATTTTTCATGGCTGTGTTTTTTTTATCTATTTGGAACGGTATGCAAGTATTTCATTTTCATATTTACACATA…	e_2			11	S1 S2
	Toff_WURv1_g31756	SS_200000782	complement(join(216013..216073,216168..216295,216647..216688,217055..217096,217230..217329,218131..218195,218526..218601,219247..219527))	XP_023731673.1MADS-box transcription factor 23-like	MADS	Type II	AGL15	AGL15		M_AGL15_Tof-g31756	216012	219527	1	t1	t1	3515	8	795	Toff_WURv1_g31755/g31756*		ATGTGTAGTTCTTCATCATCTTCCTCAAGTGGAGGTCGTGGTGGTGGCAACGACAGTGGTGGTGGAGCTTGTGGAGGAGAAGAGAGACGGAGGAAGACGATGGGTCGGGGGAGGATTGAGATAAAAAAGATTGAGAATGTCAGTAGTCGACAGGTAACGTTTTCAAAACGTCGTGCTGGACTTATGAAGAAAGCTAAAGAGTTGGCAATTCTGTGTGATGCGGAGGTGGGCGTTATCATATTTTCCAGTACTGGAAAACTCTATGAATTTGCTAGTTCTCGGTATGTACATATTATATTTCCTCAACTCCTTCTAGCTTCTAGGGAACATTGTGTATTTTTGTTATTTTTTTATGAATACATTTTACCTCAGGAATTATAAAAACAAATTATTCATAAA…	f_1			2	F0 S0 S1 S2
	Toff_WURv1_g31755	SS_200000782	complement(join(205035..205095,205393..205520,205872..205913,206282..206323,206457..206556,207356..207420,207749..207824,208468..208748))	XP_023731673.1MADS-box transcription factor 23-like	MADS	Type II	AGL15	AGL15		M_AGL15_Tof-g31755	205034	208748	1	t1	t1	3714	8	795	Toff_WURv1_g31755/g31756*		ATGTGTAGTTCTTCATCATCTTCCTCAAGTGGAGGTCGTGGTGGTGGCGACGACAGTGGTGGTGGAGCTTGTGGAGGAGAAGAGAGACGGAGGAAGACGATGGGTCGGGGGAGGATTGAGATAAAAAAGATTGAGAATGTCAGTAGTCGACAGGTAACGTTTTCAAAACGTCGTGCTGGACTTATGAAGAAAGCTAAAGAGTTGGCAATTCTGTGTGATGCGGAGGTGGGCGTTATCATATTTTCCAGTACGGGAAAACTCTATGAATTTGCTAGTTCTCGGTATGTACATATTATATTTCCTCAACTCCTTCTAGCTTCTAGGGAACATTGTGTCTTTTTGTTATTTTTTTATGAATACATTTTACCTCAGGAATTATAAAAACAAATTATTCATAAA…	f_2	12		2	F0 S0 S1 S2
	Toff_WURv1_g40380	SS_200000113693	complement(join(1532..1585,1855..2466))	XP_023763222.1agamous-like MADS-box protein AGL62	MADS	Type I	Mα	AGL62		Mα_AGL62_Tof-g40380	1531	2466	1	t1	t1	935	2	666	Toff_WURv1_g40380/g40384*		ATGACAAGAATGGCGAAAGAAAGTAACTTATTAGTTACTTTCTCAAAACGCCGTTCTGGCCTTTTCAAAAAAGCAAGTGAACTAAGCATCTTATGTGGGGCCGAAATCACAATCATCGTCTTCTCCCCTGGCAAAAAGGTGTTCTCCTTTGGCCATCCATCTGTTGAGATGGTCGTCGATCGCTTTTTATCTCAAAATCCCCCGCCGAATTCCAGCACATCGCAGCTTGTTGAGGCTCATCGGAATGCCAATATCCATGAACTCAATCGGCAACTTACTTATGTAATTGGTCAATTTGAATTTGAGAAGAACCAAAGTGAGCATCTTAGCAATATCAGGAAAGCGGGAGAAGATAATCACTGGTGGGAAGCTCCAATTGAGAGCTTAAGATTAACTGAA…	g_1	121		11	S1 S2
	Toff_WURv1_g40384	SS_200000113693	join(27842..28122,28179..28452,28722..28775)	XP_023763222.1agamous-like MADS-box protein AGL62	MADS	Type I	Mα	AGL62		Mα_AGL62_Tof-g40384	27841	28775	1	t1	t1	934	3	609	Toff_WURv1_g40380/g40384*		ATGACAAGAATGGCGAAAGAAAGTAACTTATTAGTTACTTTCTCAAAACGCCGTTCTGGCCTTTTCAAAAAAGCAAGTGAACTAAGCATCTTATGTGGGGCCGAAATCACAATCATCGTCTTCTCCCCTGGCAAAAAGGTGTTCTCCTTTGGCCATCCATCTGTTGAGATGGTCGTCGATCGCTTTTTATCTCAAAATCCCCGCCGAATTCCAGCACATCGCAGCTTGTTGAGGCTCATCGGAATGCCAATATCCATGAACTCAATCGGCAACTTACTTATGTAATTGGTCAATTTGAATTTGAGAAGAACCAAAGTGAGCATCTTAGCAATATCAGGAAAGCGGGAGAAGATAATCACTGGTGGGAAGCTCCAATTGAGAGCTTAAGATTAACTGAAC…	g_2
	Toff_WURv1_g40774	s319_494470_512826	8039..8704	XP_023763224.1agamous-like MADS-box protein AGL62	MADS	Type I	Mα	AGL62		Mα_AGL62_Tof-g40774	8038	8704	1	t1	t1	666	1	666	Toff_WURv1_g40385/g40774*		ATGGCGCCTAAGAGAAGTTTGGGTCGGCAAAAGATTAAAATCGCTCAAATCCAGAAAAAATCCGATCTCCAAGTAACTTTCTCAAAAAGACGGGTAGGGCTCTTTAAGAAAGCTAGCGAGCTTTGCACATTGTGTGGGGTTGAGATCGCCATTATCGTCTTTTCTCCAGCTCGGAAAGTTTACTCCTTCGGCCACCCTAAAGTTGAGTCAATTGTTGATAGATTCCTGACCCGGAACCCAAATCTAAACTCTACAAGTTTACATCTTGTAGAGGCGCATATGATAGCTTCCATTCCTGATCTAAACGTGCAGCAAACGCACATGCGTGACGAATTAGAAGCCGAGAAAAAAAGAAGCGAAACCCTAGATGAAATGAGAAAGGCTAGCCAGAGCCAGTTC…	h_1			4	F1 F2
	Toff_WURv1_g40385	SS_200000113693	36030..36695	XP_023763224.1agamous-like MADS-box protein AGL62	MADS	Type I	Mα	AGL62		Mα_AGL62_Tof-g40385	36029	36695	1	t1	t1	666	1	666	Toff_WURv1_g40385/g40774*		ATGGCGCCTAAGAGAAGTTTGGGTCGGCAAAAGATTAAAATCGCTCAAATCCAGAAAAAATCCGATCTCCAAGTAACTTTCTCAAAAAGACGGGTAGGGCTCTTTAAGAAAGCTAGCGAGCTTTGCACATTGTGTGGGGTTGAGATCGCCATTATCGTCTTTTCTCCAGCTCGGAAAGTTTACTCCTTCGGCCACCCTAAAGTTGAGTCAATTGTTGATAGATTCCTGACCCGGAACCCAAATCTAAACTCTACAAGTTTACATCTTGTAGAGGCGCATATGATAGCTTCCATTCCTGATCTAAACGTGCAGCAAACGCACATGCGTGACGAATTAGAAGCCGAGAAAAAAAGAAGCGAAACCCTAGATGAAATGAGAAAGGCTAGCCAGAGCCAGTTC…	h_2	20
	Toff_WURv1_g40387	SS_200000113693	42296..42961	PWA81446.1Transcription factor	MADS	Type I	Mα	AGL61		Mα_AGL61_Tof-g40387	42295	42961	1	t1	t1	666	1	666	Toff_WURv1_g40387/g40775*		ATGGCGCCTAAGAGAAGTTTGGGTCGCCAAAAAATCAAAAACGAAAAAATCCAGATAAAAAACCATCTGCAAGTGACTTTCTCAAAACGAAGGACCGGGCTTTTGAAAAAGGCTAGCGAGCTATGCACATTATGTGGAGTTGAAATCGCTATTATCGTATTTTCTCCCGCGGGGAAAGTTTACTCATTTGGGCATCCAAATGTTGAGTCAATTGTTGATAGATTTCTTACTCGAAACCTAAATATCAACTCTACAAGTTTACATCTTGTAGAGGCGCATAGGATAGCTACTATTCCTGACCTAAACATTCAGCAAACGCACATGAGCGACGAATTAGAAGCAGAGAAAAAAAGAAGTGAAACCCTAGATGAAATGAGAAAGGCTAGCCAGAGTCAGTTC…	i_1			1	F0 S0
	Toff_WURv1_g40775	s319_494470_512826	11219..11884	PWA81446.1Transcription factor	MADS	Type I	Mα	AGL61		Mα_AGL61_Tof-g40775	11218	11884	1	t1	t1	666	1	666	Toff_WURv1_g40387/g40775*		ATGGCGCCTAAGAGAAGTTTGGGTCGCCGAAAAATCAAAAACGAAAAAATCCAGATAAAAAACCATCTCCAAGTGACTTTCTCAAAACGAAGGACCGGGCTTTTGAAAAAGGCTAGCGAGCTATGCACATTATGTGGGGTTGAAATCGCTATTATCGTATTTTCTCCCGCGGGAAAAGTTTACTCATTTGGGCATCCAAATGTTGAGTCGATTGTTGATAGATTTCTTACTCGAAACCTAAATATCAACTCTACAAGTTTACATCTTGTAGAGGCGCATAGGATAGCTACAATTCCTGACCTAAACATCCAGCAAACGCACATGAGCGACGAATTAGTAGCAGAGAAAAAAAGAAGTGAAACCCTAGATGAAATGAGAAAGGCTAGCCAGAGTCAGTTC…	i_2			1	F0 S0
	Toff_WURv1_g40602	s2081	join(20107..20291,22290..22368,22627..22691,25402..25501,25592..25633,25796..25837,25987..26111,26184..26289)	XP_023771445.1truncated transcription factor CAULIFLOWER A-like	MADS	Type II	AP1/FUL	AGL8		A2_AP1/FUL_Tof-g40602	20106	26289	1	t1	t1	6183	8	744	Toff_WURv1_g40602/g40612*		ATGGGGAGAGGAAGGGTGCAGTTGAAGCGGATCGAGAACAAGATTAGCCGACAAGTAACGTTCTCCAAAAGAAGAACAGGTTTGCTCAAGAAAGCTCATGAGATCTCGGTCTTGTGCGATGCTGATGTTGCTCTCATCGTCTTTTCCACTAAAGGAAAACTTTTTGAGTACGCAACTCACTCCAGGTATTTGCTAACCCCCATACTTTCTTCTTCTTCATCTTCTTCAACTTCTTAAAACACAATTTTCACTTTATTGTTTGAGATCGGTTTGTAATTATAAATCTTTTTAAAGTTATTTTCATCTGTTCAAGATTTCAACTTCTTAATTTCTGTCTTGATTTTGTTTTTTGAGTTTTGTTTATGTTTGGATACAGTCATCCAAACGTACATACCTACT…	j_1	1		2	F0 S0 S1 S2
	Toff_WURv1_g40612	s2081	complement(join(62351..62456,62528..62652,62802..62843,63007..63048,63139..63238,65910..65974,66233..66311,68312..68496))	XP_023771445.1truncated transcription factor CAULIFLOWER A-like	MADS	Type II	AP1/FUL	AGL7		A2_AP1/FUL_Tof-g40612	62350	68496	1	t1	t1	6146	8	744	Toff_WURv1_g40602/g40612*		ATGGGGAGAGGAAGGGTGCAGTTGAAGCGGATCGAGAACAAGATTAGCCGACAAGTAACGTTCTCCAAAAGAAGAACAGGTTTGCTCAAGAAAGCTCATGAGATCTCGGTCTTGTGCGATGCTGATGTTGCTCTCATCGTCTTTTCCACTAAAGGAAAACTTTTTGAGTACGCAACTCACTCCAGGTATTTGCTAACCCCCATACTTTCTTCTTCTTCATCTTCTTCAACTTCTTAAAACACAATTTTCACTTTATTGTTTGAGATCGGTTTGTAATTATAAATCTTTTTAAAGTTATTTTCATAAAGATGTGTATGCATCTGTTCAAGATTTCAACTTCTTAATTTCTGTCTTGATTTTGTTTTTTGAGTTTTGTTTATGTTTGGATACAGTCATCCA…	j_2			2	F0 S0 S1 S2
	Toff_WURv1_g42125	s3678	complement(join(3813..3897,3982..4148,4242..4283,4345..4386,4487..4586,4678..4742,4812..4890,8315..8499))	XP_023728966.1MADS-box protein CMB1-like isoform X2	MADS	Type II	SEP	AGL4		E3_SEP2_Tof-g42125	3812	8499	1	t1	t1	4687	8	765	Toff_WURv1_g40941/g42125*		ATGGGTAGAGGAAGAGTAGAGTTGAAGAGGATAGAAAACAAGATCAACAGGCAGGTGACTTTTGCTAAAAGAAGAAACGGACTTTTGAAGAAAGCTTATGAACTCTCTGTTCTTTGTGATGCTGAAGTTGCTCTCATCATCTTCTCCAACCGTGGCAAGCTCTATGAGTTCTGCAGTACCTCCAAGTACTTTCTCTCTCTAGATCTTCCCTTCTCTCTTTCTCTTTCTCTTTCTCTTTGTTGGTGTTTTCTTGTTTTATCTTTTGTGAATTGATGGGTTTAGGTGTTTCGGGTTTTGAGGTAAAAGTTTAGAGTTGTGGTTATTTAAACGAAGTTGTCTCGAAGGTTTTGCATGTCGGTTAGATCTAGGCTTTCGATCTGTCGGTTTATTATCCAAATC…	k_1			6	F2
	Toff_WURv1_g40941	s68_1540738_1585332	join(23755..23758,23848..23938,27358..27436,27506..27570,27662..27761,27862..27903,27965..28006,28100..28266,28351..28435)	XP_023728966.1MADS-box protein CMB1-like isoform X2	MADS	Type II	SEP	AGL4		E3_SEP2_Tof-g40941	23754	28435	1	t1	t1	4681	9	675	Toff_WURv1_g40941/g42125*		ATGGGTAGAGGAAGAGTAGAGTTGAAGAGGATAGAAACAAGATCAACAGGCAGGTGACTTTTGCTAAAAGAAGAAACGGACTTTTGAAGAAAGCTTATGAACTCTCTGTTCTTTGTGATGCTGAAGTTGCTCTCATCATCTTCTCCAACCGTGGCAAGCTCTATGAGTTCTGCAGTACCTCCAAGTACTTTCTCTCTCTAGATCTTCCCTTCTCTCTTTCTCTTTCTCTTTCTCTTTGTTGGTGTTTTCTTGTTTTATCTTTTGTGAATTGATGGGTTTAGGTGTTTCGGGTTTTGAGGTAAAAGTTTAGAGTTGTGGTTATTTAAACGAAGTTGTCTCGAAGGTTTTGCATGTCGGTTAGATCTAGGCTTTCGATCTGTCGGTTTATTATCCAAATCT…	k_2
	Toff_WURv1_g47577	SS_4	join(2088848..2088890,2090439..2090467,2091001..2091075,2091124..2091203,2092640..2092724,2092826..2092944,2093296..2093308)	XP_023760420.1agamous-like MADS-box protein AGL11	MADS	Type II/I	AG	AGL11/STK		D2_AGL11_Tof-g47577_	2088847	2093308	1	t1	t1	4461	7	444	Toff_WURv1_g47577/g72631*		ATGCTCGTCGGCGAGATTACTTGCGGCGCTCCGCCACGTACTAGTGAGCAAAAATTAAGACTTCAATGACCATTTAAGTCGAAAACTCCTATATTAAAAAAGAAATATGTAAGAGACCTACTGGCTTGATGCTCGCGAACCAACAAAGTATAATCTGAAAACTAGGGATGCCAAGGGAACCGGACCGACCCGGCTGTGGAACCGGAAGCGAAAAATGTCAAAAGGTGGAACCGGAACCGGACCGCCGGTTTGACCAAGGGAACCGAAATCAGACCGACTAGAACTGGTGTTGCATATATATGTTGGTTTACTTAATATATGAATACGATGATAAGCAACGGAACCGGAATCGGCCCGACTAAAAGAAACGGACCTGCTCTGGAACCGGAACCGAAAACA…	l_1	5		6	F2
	Toff_WURv1_g72631	SS_200000791	complement(join(31956..31968,32169..32230,32332..32416,33883..33962,34011..34085,34629..34657,35254..35257))	XP_023760420.1agamous-like MADS-box protein AGL11	MADS	Type II	AG	AGL11/STK		D2_AGL11_Tof-g72631_	31955	35257	1	t1	t1	3302	7	348	Toff_WURv1_g47577/g72631*		ATGGGTATAGTACTTGGTGGTGTGTTCGTGAATAGGGAAGAAAGGGAAGGGTAGAATGGTAAATTGATTGAATTACCAGTTTAGGGTGAATTCTCCCTCCATTGCTTTTCTGTACAATACATCAAATATGGGAAAGGACGAAAGGTCATTGTCTCCGCCAGCTAGCAATAACATGATGAGATGAGGGATGGTTTGTACTTTGTAGCGTTTTTAAGACTATAATACCTTCTTCCATTGAAGAGAGATTAAAAGAGAGGTGATCGTTTTCTTCTTTCTTCTTCAAAGGTACTGTTTTTGGTCTGTTTATATATACCCATTTACATGTTCATACAGATTCTATATCTTCATCCGTAGATTAATTATATGCATACAGTATGGAGTTCTTTCAGTCTCTTTTCT…	l_2			3	F1
	Toff_WURv1_g40264	SS_200000104812	join(78251..78438,78600..78666,79301..79362,79487..79586,79681..79710,79791..79835,79981..80079)	XP_023762568.1floral homeotic protein PMADS 2-like	MADS	Type II	PI	PI		B1_PI_Tof-g40264_Ls03	78250	80079	1	t1	t1	1829	7	591	Toff_WURv1_g8985/g40264*	Toff_WURv1_g8985.t1	ATGGGAAGAGGAAAGACAGAGATCAAGAGGATAGAAAACATTAGCAACAGGCAAGTCACATACTCAAAGAGAAAAAATGGAATCATCAAGAAAGCTAAAGAAATCACTGTTCTTTGTGATGCTAATGTCTCTCTTGTTATCTGCGGCTCTTCCGGAAAGATGTATGAATACTGTAGCCCCAAAACCAAGTATGTACCTTCAGAATTTTGCTTTTGTGTGTTTTAGGGTTTTCATTCTTTTAATCATATATACCTTTTTTGTTTCCATGTTTAGCTCAAGTACTTTCTGTTTGTGGGTTGTTGCTAATTATTTGGTTCTTTTCATTTTGTGTAACAATTTAAATTGGAAGCTTGATTGACATGGTGGATCGATATCAAAGGCTTTCTGGAAATAAGTTGT…	m_1	10		3	F1
	Toff_WURv1_g8985	SS_146	complement(join(32143..32241,32387..32431,32513..32542,33141..33240,33356..33417,34046..34112,34271..34458))	XP_023762568.1floral homeotic protein PMADS 2-like	MADS	Type II	PI	PI		B1_PI_Tof-g08985_LS03	32142	34458	1	t1	t1	2316	7	591	Toff_WURv1_g8985/g40264*	Toff_WURv1_g40264.t1	ATGGGAAGAGGAAAGACAGAGATCAAGAGGATAGAAAACATTAGCAACAGGCAAGTCACATACTCAAAGAGAAAAAATGGAATCATCAAGAAAGCTAAAGAAATCACTGTTCTTTGTGATGCTAATGTCTCTCTTGTTATCTGCGGCTCTTCCGGAAAGATGTATGAATACTGTAGCCCCAAAACCAAGTATGTACCTTCAGAATTTTGCTTTTGTGTGTTTTAGGGTTTTCATTCTTTTAATCATATATGCCTTTTTTGTTTCCATGTTTAGCTCAAGTTTCTGTTTGTGGGTTGTTGCTAATTATTTGGTTCTTTTCATTTTGTGTAACAATTTAAATTGGAAGCTTGATTGACATGGTGGATCGATATCAAAGGCTTTCTGGAAATAAGTTGTGGG…	m_2	10		3	F1
	Toff_WURv1_g10404	SS_170	join(739072..739630,739691..740071,740152..740168)	XP_023756208.1transcription factor TCP13-like isoform X1	TCP	Class II	CIN	TCP13-Like		CIN_TCP13L_Tof-g10404	739071	740168	1	t1	t1	1097	3	957	Toff_WURv1_g10404/g32550*	Toff_WURv1_g32550.t1	ATGAACATCTCAAATAATTTAAGAGAATCAGACCACGAATCAAAGCAAGAAGGTAGTGCTAACGATGGTAGTAGCAAAATTACCCCTAGACCAAACTTCACCACATCATCATGGTCCCGATTGAAAGACCCAAGAATTGTTCGAGTTTCTAGAGCTTTTGGTGGAAAAGATCGACATAGTAAAGTGTGTACGGTTAGGGGCTTAAGAGACCGGCGAGTTAGGCTTTCAGTTCCCACCGCTATCCAATTGTATGATCTTCAAGATCGATTAGGACTCAAGCAACCTAGTAAAGTTGTCGATTGGTTACTTGATGCAGCTAAACATGAAATCGATGAACTCCCTCCTCTCCAAATCCCGCCAGGTAGCTTCGGACAAAATCTTCAAGCAATGTTTAATAAT…	n_1	2
	Toff_WURv1_g32550	SS_200000893	join(696012..696570,696631..697011,697092..697108)	XP_023756208.1transcription factor TCP13-like isoform X1	TCP	Class II	CIN	TCP13-Like		CIN_TCP13L_Tof-g32550	696011	697108	1	t1	t1	1097	3	957	Toff_WURv1_g10404/g32550*	Toff_WURv1_g10404.t1	ATGAACATCTCAAATAATTTAAGAGAATCAGACCACGAATCAAAGCAAGAAGGTAGTGCTAACGATGGTAGTAGCAAAATTACCCCTAGACCAAACTTCACCACATCATCATGGTCCCGATTGAAAGACCCAAGAATTGTTCGAGTTTCTAGAGCTTTTGGTGGAAAAGATCGACATAGTAAAGTGTGTACGGTTAGGGGCTTAAGAGACCGGCGAGTTAGGCTTTCAGTTCCCACCGCTATCCAATTATATGATCTTCAAGATCGATTAGGACTCAATCAACCGAGTAAAGTTGTCGATTGGTTACTTGATGCAGCTAAACATGAAATCGATGAACTCCCTCCTCTCCAAATCCCGCCAGGTAGCTTCGGACAAAATCTTCAAGCAATGTTTAATAAT…	n_2	2
	Toff_WURv1_g26404	SS_200000273	join(1488586..1489852,1489920..1489993,1492928..1492981)	XP_023732997.1transcription factor TCP2-like	TCP	Class II	CIN	TCP2-Like		CIN_TCP02L_Tof-g26404	1488585	1492981	1	t1	t1	4396	3	1395	Toff_WURv1_g12085/g26404*		ATGGAGGTGGATGAAATTGAAAGACAGGTGACTAAGTTTCAAAGGGTTGGTTCTAATGGTGATAATTCTTCAAACCCTCATAAGATAGCTACTCTGAGAGGGAATTTGGATGTACGAAACCTGGAGCATCGGTTTCCCGATGAGAATGGCGGCGGCGGCGGCGGTGGAGTTGTTGGGAGGCTTTGTGGATGGCCGTCGTCGCGAATCGTTAGGGTTTCTAGAGCTTCGGGTGGGAAGGATAGACACAGTAAGGTTTTGACATCGAAAGGGTTGAGAGACCGCCGGGTACGGTTGTCGGTAACGACCGCCATCCAGTTTTATGATCTACAAGACCGATTAGGTTATGATCAGCCGAGTAAAGCGGTGGAGTGGTTGATTAAAGCGGCGTCGAGTTCTATT…	o_1	9		1	F0 S0
	Toff_WURv1_g12085	SS_186	13039493..13040836	XP_023766192.1transcription factor TCP2-like	TCP	Class II	CIN	TCP2-Like		CIN_TCP02L_Tof-g12085	13039492	13040836	1	t1	t1	1344	1	1344	Toff_WURv1_g12085/g26404*		ATGGAGGTGGATGAAATTCAAAGACAGGTGCGTAAATTCCAAAGGGTTTCGTCTAATGGTAGTACTACAACTACTGATAATTCTTCAAATCCTCAAAAGATAGCTACTTATAAAGGGAATTTGGAGTTGCAGAAGTTTGATGATGGTGGTGTGGGCGGAGGGGGAATAGATGTTGTTGTGGGTGGAGGTGGTGGCGATGGTGTGGCGAGGCTTTGTGGATGGCCGTCGTCTCGGATTGTTAGGGTTTCGAGGGCGTCTGGAGGGAAGGATAGACACAGCAAGGTTTTGACATCGAAAGGACTGAGAGATCGTCGTGTCCGGCTGTCTGTTAGTACCGCTATCCAGTTTTACGATCTGCAAGACCGATTAGGTTATGATCAGCCGAGCAAGGCGGTAGAG…	o_2	9		2	F0 S0 S1 S2
	Toff_WURv1_g28306	SS_200000396	join(578425..579423,579518..579574)	XP_023767137.1transcription factor TCP18-like	TCP	Class II	CYC/TB1	TCP18-Like		CYC_TCP18L_Tof-g28306	578424	579574	1	t1	t1	1150	2	1056	Toff_WURv1_g2203/g28306*		ATGATATATACCAATCAGTCAAGAATCCCTCAAGAACATCACTATGCTCCATCATCTTTTTCCTCCTTCCTCCTTCCATCCCCTAATTACATTCCTGTAGAAGATGAAACTCTCTTCTGCAGGTCCTTCCAACAACAACAGTATTTCTCCAACGATCATAACCACCTGCAAGATTCAATCATTCTAGGTGATCATGACATGGCTACAAATGTGGAATCTATCATAGGAATGTGTGGTAGCAACAATGGAGTACTACGACAAGTTGCTAGGGTTAACGATGGAGACGATGAACCCTACGAGTTTATAAGCACTCACGCGGGCCCTGAAAGTAGCAGTCCAAGGAAGCGACATTCGAAAGGAGATCGACACAGCAAGATTGACACGGCTCGAGGACCCAGA…	p_1			2	F0 S0 S1 S2
	Toff_WURv1_g2203	SS_14	55686..56477	XP_023767137.1transcription factor TCP18-like	TCP	Class II	CYC/TB1	TCP18-Like		CYC_TCP18L_Tof-g02203	55685	56477	1	t1	t1	792	1	792	Toff_WURv1_g2203/g28306*	partial	ATGATATATACCAATCAGTCAAGAATCCCTCAAGAACATCACTATGCTCCATCATCTTTTTCCTCCTTCCTCCTTCCATCCCCTAATTACATTCCTGTAGAAGATGAAACTCTCTTCTGCAGGTCCTTCCAACAACAACAGTATTTCTCCAACGATCATAACCACCTGCAAGATTCAATCATTCTAGGTGATCATGACATGGCTACAAATGTGGAATCTATCATAGGAATGTGTGGTAGCAACAATGGAGTACTACGACAAGTTGCTAGGGTTAACGATGGAGACGATGAACCCTACGAGTTTATAAGCACTCACGCGGGCCCTGAAAGTAGCAGTCCAAGGAAGCGACATTCGAAAGGAGATCGACACAGCAAAATTGACACGGCTCGAGGACCCAGA…	p_2
	Toff_WURv1_g41357	s2744	complement(14556..15653)	XP_023753343.1transcription factor TCP19-like	TCP	Class I	PCF	TCP18-Like		PCF_TCP18L_Tof-g41357	14555	15653	1	t1	t1	1098	1	1098	Toff_WURv1_g34756/g41357*		ATGGCGTCGATTGATAGCAGGAGTATTGAATCAGAAGACGAAGAAGGTGGCAACACCGCCAAAATTTTGTCAGCATCTGATCCATTACTTGGTGATCCGGCGGTGTATACTATAACAGCGGTTCCTCACCGTCATAACTCGCCGCCCCCAATGGAAGTTAATCTTATGAAGGAAGAACCACCGGAGAACGATTTGGATGGTTCAATACCCTTAGCCATCGTCCCAATGCCAACACCTAATAAACAAATCACGGTGGCAACGCCACGGAGGGCCTCTAAGGACCGACACACGAAGGTGGAGGGCCGTGGCCGGAGAATCCGCATGCCGGCCGCGTGTGCCGCGAGAATATTTCAGTTGACACGAGAACTAGGCCATAAGTCAGACGGCGAGACGATTCGG…	q_1			6	F2
	Toff_WURv1_g34756	SS_2000004053	complement(176200..177303)	XP_023753343.1transcription factor TCP19-like	TCP	Class I	PCF	TCP18-Like		PCF_TCP18L_Tof-g34756	176199	177303	1	t1	t1	1104	1	1104	Toff_WURv1_g34756/g41357*		ATGGCGTCGATTGATAGCAGGAGTATTGAATCAGAAGACGAAGAAGGTGGCAACACCGCCAAAATTTTGTCAGCATCTGATCCATTACTTGGTGATCCGGCGGTGTATACTATAACAGCGGTTCCTCACCGTCATAACTCGCCGCCCCCAATGGAAGTTAATCTTATGAAGGAAGAACCACCGGAGAACGATTTGGATGGTTCAATACCCTTAGCCATCGTCCCAATGCCAACACCTAATAAACAAATCACGGTGGCAACGCCACGGAGGGCTTCTAAGGACCGACACACGAAGGTGGAGGGCCGTGGCCGGAGAATCCGCATGCCGGCCGCGTGTGCCGCGAGAATATTTCAGTTGACACGAGAACTAGGCCATAAGTCAGACGGCGAGACGATTCGG…	q_2	4	9	6	F2
	Toff_WURv1_g35213	SS_2000004157	complement(825642..826610)	XP_023731371.1transcription factor TCP15-like	TCP	Class I	PCF	TCP15-Like		PCF_TCP15L_Tof-g35213	825641	826610	1	t1	t1	969	1	969	Toff_WURv1_g35213/g45767*		ATGGAAGGTCATGAAGATCAAGCTTACTTCCGCCGCCCAAACCACCCATTACAACTGCTTGAAGAAGGATCCGGTTGCGTTAATGGTGAAGATGCTACGGTGGAGCTGCAACCAGCGCCCAAAGCAAGTCTACCGCAAAAGAGAGGAATAACAAAGGACAGACACACCAAAGTCGACGGCAGAGGCCGCCGTATCCGTATGCCCGCCGTGTGTGCTGCCAGAGTCTTCCAGCTGACAAGGGAGCTTGGCCACAAATCCGACGGTGAGACAATCGAGTGGCTGCTACAGCAGGCGGAACCTTCCGTCATTGCCGCTACCGGAACCGGAACAATCCCCGCTAACTTCACTTCCCTTAACATCTCTCTCCGGGGATCGGGCTCCACGATCATGGCGGGACCG…	r_1	3	8
	Toff_WURv1_g45767	s2713	complement(16893..17861)	XP_023731371.1transcription factor TCP15-like	TCP	Class I	PCF	TCP15-Like		PCF_TCP15L_Tof-g45767	16892	17861	1	t1	t1	969	1	969	Toff_WURv1_g35213/g45767*		ATGGAAGGTCATGAAGATCAAGCTTACTTCCGCCGCCCAAACCACCCATTACAACTGCTTGAAGAAGGATCCGGTTGCGTTAATGGTGAAGATGCTACGGTGGAGCTGCAACCAGCGCCCAAAGCAAGTCTACCGCAAAAGAGAGGAATAACAAAGGACAGACACACCAAAGTCGACGGCAGAGGCCGCCGTATCCGTATGCCCGCCGTGTGTGCTGCCAGAGTCTTCCAGCTGACAAGGGAGCTTGGCCACAAATCCGACGGTGAGACAATCGAGTGGCTGCTACAGCAGGCGGAACCTTCCGTCATTGCCGCTACCGGAACCGGAACAATCCCCGCTAACTTCACTTCCCTTAACATCTCTCTCCGGGGATCGGGCTCCACGATCATGGCGGGACCG…	r_2			5	F1 F2 F3
	**Reference genes are taken together per type
	Toff_WURv1_g12576	SS_186	join(19682662..19682914,19683130..19683244,19685372..19685480,19685581..19685658,19685746..19685937,19686004..19686177)	XP_023761316.1serine/threonine-protein phosphatase PP2A-2 catalytic subunit	REF		PP2A			REF_PP2A_Tof-g12576	19682661	19686177	1	t1	t1	3516	6	921			ATGCCGTCGCACGCGGATGTAGATAGGCAGATAGAGCAGTTGATGGAGTGCAAGGCGTTGACGGAATCGGAGGTGAAAACCCTTTGCGATCAAGCTAGGGCTATACTTGTAGAGGAATATAATGTGCAACCGGTGAAGTGTCCGGTCACGGTTTGTGGTGATATCCATGGTCAGTTTTACGATCTCATCGAGCTGTTCCGGATTGGTGGAAGTACTCCTGATACCAATTATCTCTTCATGGGTGATTACGTCGGTGAGTTAATTGTTCTTCCATTACTGAATTTCTTAAATTTGGGCATTTTGTAATTGTACTAATGTGGAGCTATCAGTGTTGAAAATTGGGTTTATTATCCACATGATTTTGTGGGGAATTTGGATGTCTATGCAAATATTGAAGGC…				7	F2 F3
	Toff_WURv1_g38505	SS_200000100448	join(20860..21112,21445..21559,21645..21753,21826..21903,21993..22184,22277..22450)	XP_023740301.1serine/threonine-protein phosphatase PP2A-2 catalytic subunit-like	REF		PP2A			REF_PP2A_Tof-g38505	20859	22450	1	t1	t1	1591	6	921			ATGCCGTCGCACGCAGATGTAGATCGGCAGATAGAGCAATTGATGGAGTGCAAACCGTTGACGGAATCGGAGGTGAAAATTCTTTGCGATCAAGCTAGGGCCATACTTGTAGAGGAATGGAATGTCCAGCCGGTCAAATGTCCTGTTACCGTTTGTGGCGATATTCATGGTCAGTTTTACGATCTGATCGAGCTGTTTCGGATAGGCGGAAATCCTCCCGATACCAATTACCTCTTCATGGGCGATTACGTTGGTAAGATCTCAATTTTCCGATTTTACGCTTCGTAAATCTCGTGCCTTAGTTAAACGCTAGCGACGTGTTGAAAATTTTGGGGCTTATTAAGGATCGCTTATAGGAATCGAATTCATTTTCTCAGAAGCTCGAAATTTATGACAGAT…				7	F2 F3
	Toff_WURv1_g29996	SS_200000576	join(291206..291208,291324..291440,291552..291643,291817..291887,292242..292369,292548..292652,292737..292880)/join(305492..305561,306159..306286,306465..306569,306659..306802)	TEY72157.1ubiquitin-conjugating enzyme E2 D/E	REF		UBC			REF_UBC_Tof-g29996	291205	292880	1	t1	t1	1675	7	660			ATGGTAAAAAAAAATGTAATGATGTATTATAGTGGATAGGAATATGATATAACTCTTTTACCGAAGAAGAAATTAAAAATACACGGTACATTCCATTGTTTCCTTTGCGACGACGGAGGGTCGATCTGGAGACGGTATCTATATAAAGCCCATTTCTACGAACACCATTATATTCCTCCGGTTACCTCCGGTTATTTACAGAATCTTGATAACCAGAGGTGAGGGGATCTTCAAGGTAATTGATTCTACCTTTTTCTCTTGATTTTCTCTTCGATCTCTACTGCATATACGTAGCTACTACGTCTTCTAATCTGAGTTAGGGTTTGTATAATTTGCTGAAATCCAGGATTTCCTTGTGGTGTTGAGCGATGGCTTCCAAGCGGATCTTGAAGGAGCTCA…				7	F2 F3
	Toff_WURv1_g78847	SS_200000101236	join(305492..305561,306159..306286,306465..306569,306659..306802)	XP_021909131.1SUMO-conjugating enzyme UBC9	REF		UBC9			REF_UBC9_Tof-g78847	305491	306802	1	t1	t1	1311	4	447		Toff_WURv1_g68113.t1	ATGGCTTCCAAGCGGATCTTGAAGGAGCTCAAGGATCTTCAGAAAGATCCTCCTACCTCTTGCAGCGCAGGTACGTCATCGATATCGATCTGTTAGATCCTTGTTTTCGATGTTTTTTATATGGACGTATGGTTTTGATCTCTTATCTTCCGTGTTCATAGTCGTCTAGTGAGGTGATAGATGTCTTTTTGCTGGAATTTTGCTTTCTTTTGGTGTTTGCTTTGTGGAAAAGCTAAATTGCAGGGTTTTCCTTCTCGATTCTGGTCAAATATTTCGAGAAAACTTGTCTGTTTATAGGTGTAGGGTAGGAGTTGATGATTTAGATTTAGTCGTTGTTGATATATGGTAGATCATGGTCAGCTTGTGCTTTTTCAAGGTTTTCACCTGTGTATGTCCAAT…				7	F2 F3
	***These FLC-like genes were excluded from the phylogeny (Figure 1B) and expression visualization (Figure 5C) due to a lacking k-box domain.
